# Supplementary material for: Visible-light-induced direct 3-ethoxycarbonylmethylation of 2-aryl-2H-indazoles in water
Source: Royal Society of Chemistry journal article supplement (doi:10.1039/d1qo01870a), 2022-01-01
Supplement: d1qo01870a1.pdf [file d1qo01870a1.pdf]

## Supporting Information

### Visible-light-induced Direct 3-Ethoxycarbonylmethylation of 2-Aryl- 2*H*-Indazoles in Water

Chun-Hua Ma,<sup>a</sup> Lu Zhao,<sup>a</sup> Xing He,<sup>a</sup> Yu-Qin Jiang,<sup>a\*</sup> and Bing Yu<sup>b\*</sup>

<sup>a</sup> Collaborative Innovation Centre of Henan Province for Green Manufacturing of Fine Chemicals, Key Laboratory of Green Chemical Media and Reactions, Ministry of Education, Henan Engineering Research Centre of Chiral Hydroxyl Pharmaceutical, Henan Engineering Laboratory of Chemical Pharmaceutical and Biomedical Materials, School of Chemistry and Chemical Engineering, Henan Normal University, Xixiang 453007, China. E-mail: jiangyuqin@htu.cn

<sup>b</sup> Green Catalysis Centre, College of Chemistry, Zhengzhou University. Zhengzhou 450001, China. E-mail: bingyu@zzu.edu.cn

### Table of Contents

|                                                                 |           |
|-----------------------------------------------------------------|-----------|
| <b>1. General information .....</b>                             | <b>2</b>  |
| <b>2. Experimental procedures .....</b>                         | <b>3</b>  |
| <b>3. Procedure and Results of Sensitivity Assessment .....</b> | <b>7</b>  |
| <b>4. Characterization of compounds.....</b>                    | <b>8</b>  |
| <b>5. NMR copies of products .....</b>                          | <b>26</b> |

## 1. General information

Dilauroyl peroxide (DLP) was purchased from damas-beta, Shanghai, China. Other reagents were purchased from Bidepharm.com. Unless otherwise stated, all commercially available reagents were directly used without further purification. All solvents were purified by standard methods before use. All reactions were monitored by thin-layer chromatography (TLC), and column chromatography was carried out on 100-200 mesh of silica gel purchased from Tansoole, Shanghai, China. All nuclear magnetic resonance (NMR) spectra were recorded on a Bruker Avance 400 MHz or 600 MHz in  $\text{CDCl}_3$  at room temperature ( $20 \pm 3$  °C), using tetramethylsilane as internal standard. High-resolution mass spectra (HRMS) were conducted on a 3000-mass spectrometer, using Bruker compact Qq TOF MS/MS system with the ESI technique.

The photochemical reactions were carried out under visible light irradiation by a white LED at r.t. RLH-18 8-position Photo Reaction System manufactured by Beijing Roger Tech Ltd. was used in this system (See Figure A). Eight 10 W white LEDs were equipped in this Photo reactor.

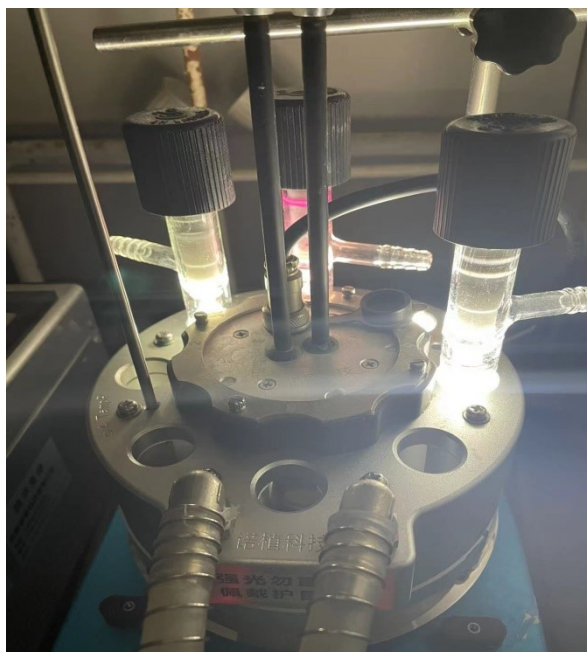

**Figure A**

## 2. Experimental procedures

### 2.1 General experimental procedures for 3-ethoxycarbonylmethylation of 2-aryl-2*H*-indazoles

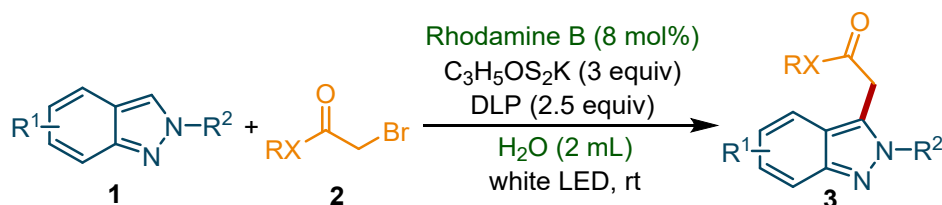

In a 10 mL reaction vial with a stirring bar, 2-aryl-2*H*-indazole **1** (0.2 mmol), ethyl 2-bromoacetate **2** (3.0 equiv.), potassium ethylxanthate (3.0 equiv.), DLP (2.5 equiv.) and Rhodamine B (8 mol%) were added, followed by adding H<sub>2</sub>O (2 mL). The mixture was stirred at room temperature with 10 W white LED irradiation for 12 h. After the reaction was completed, ethyl acetate (15 mL) was added to the residue for extraction. The combined organic layer was dried with anhydrous Na<sub>2</sub>SO<sub>4</sub> and evaporated. Then dissolved the residue in MeOH, added a few drops of Et<sub>3</sub>N and stirred for 10 minutes, the solvent was evaporated under vacuum. The residue was purified by silica gel chromatography (petroleum ether/ethyl acetate=20/1) to provide the desired product **3**.

### 2.2 General experimental procedures for ethoxycarbonylmethylated imidazo[1,2-*a*]pyridines

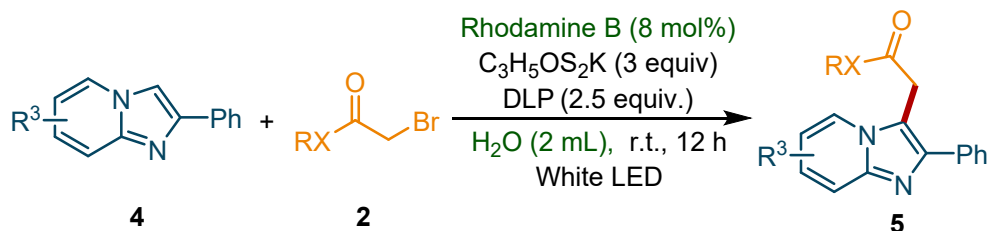

In a 10 mL reaction vial with a stirring bar, ethoxycarbonylmethylated imidazo[1,2-*a*]pyridines **4** (0.2 mmol), ethyl 2-bromoacetate **2** (3.0 equiv.), potassium ethylxanthate (3.0 equiv.), DLP (2.5 equiv.) and Rhodamine B (8 mol%) were added, followed by adding H<sub>2</sub>O (2 mL). The mixture was stirred at room temperature with 10

W white LED irradiation for 12 h. After the reaction was completed, ethyl acetate (15 mL) was added to the residue for extraction. The combined organic layer was dried with anhydrous Na<sub>2</sub>SO<sub>4</sub> and evaporated. Then dissolved the residue in MeOH, added a few drops of Et<sub>3</sub>N and stirred for 10 minutes, the solvent was evaporated under vacuum. The residue was purified by silica gel chromatography (petroleum ether/ethyl acetate=20/1) to provide the desired product **5**.

### 2.3 Control experiments

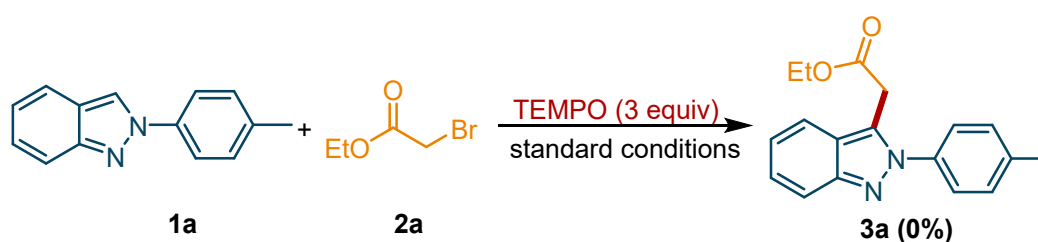

**Control experiments with TEMPO:** In a 10 mL reaction vial with a stirring bar, 2-phenyl-2*H*-indazole **1a** (0.2 mmol), ethyl 2-bromoacetate **2a** (3.0 equiv.), potassium ethylxanthate (3.0 equiv.), DLP (2.5 equiv.), Rhodamine B (8 mol%) and 2,2,6,6-tetramethyl-1-piperidinyloxy (TEMPO, 3.0 equiv.) were added, followed by adding H<sub>2</sub>O (2 mL). The mixture was stirred at room temperature with 10 W white LED irradiation for 12 h. After the reaction was completed, ethyl acetate (15 mL) was added to the residue for extraction. The combined organic layer was dried with anhydrous Na<sub>2</sub>SO<sub>4</sub> and evaporated. Then dissolved the residue in MeOH, added a few drops of Et<sub>3</sub>N and stirred for 10 minutes, the solvent was evaporated under vacuum. No target product **3a** was generated, it indicated that a radical pathway should be involved in this photocatalytic reaction.

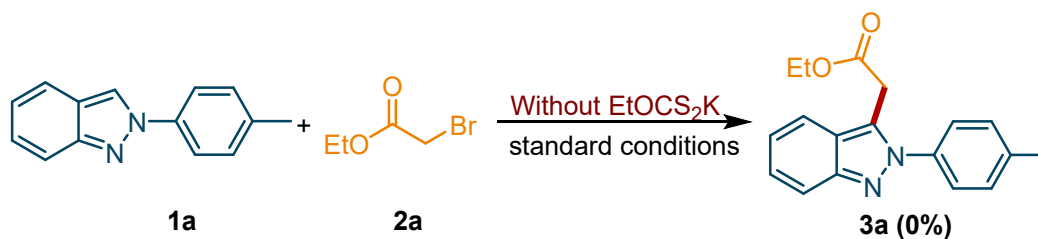

**Control experiments without EtOCS<sub>2</sub>K:** In a 10 mL reaction vial with a stirring bar, 2-phenyl-2*H*-indazole **1a** (0.2 mmol), ethyl 2-bromoacetate **2a** (3.0

equiv.), potassium ethylxanthate (3.0 equiv.), DLP (2.5 equiv.) and Rhodamine B (8 mol%) were added, followed by adding H<sub>2</sub>O (2 mL). The mixture was stirred at room temperature with 10 W white LED irradiation for 12 h. After the reaction was completed, ethyl acetate (15 mL) was added to the residue for extraction. The combined organic layer was dried with anhydrous Na<sub>2</sub>SO<sub>4</sub> and evaporated. Then dissolved the residue in MeOH, added a few drops of Et<sub>3</sub>N and stirred for 10 minutes, the solvent was evaporated under vacuum. No target product **3a** was generated, it indicated that EtOCS<sub>2</sub>K is necessary for the photocatalytic reaction.

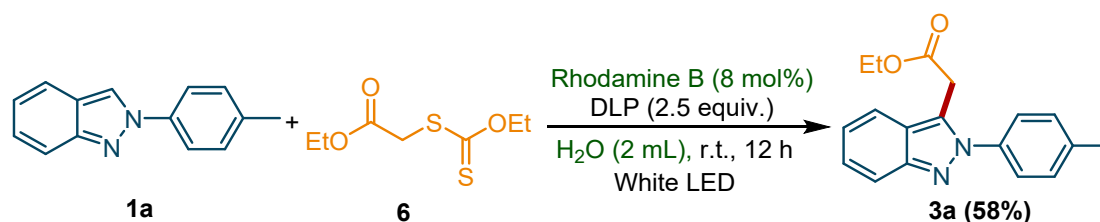

**Control experiments with ethyl 2-((ethoxycarbonothioyl)thio)acetate:** In a 10 mL reaction vial with a stirring bar, 2-phenyl-2*H*-indazole **1a** (0.2 mmol), ethyl 2-((ethoxycarbonothioyl)thio)acetate **6** (3.0 equiv.), potassium ethylxanthate (3.0 equiv.), DLP (2.5 equiv.) and Rhodamine B (8 mol%) were added, followed by adding H<sub>2</sub>O (2 mL). The mixture was stirred at room temperature with 10 W white LED irradiation for 12 h. After the reaction was completed, ethyl acetate (15 mL) was added to the residue for extraction. The combined organic layer was dried with anhydrous Na<sub>2</sub>SO<sub>4</sub> and evaporated. Then dissolved the residue in MeOH, added a few drops of Et<sub>3</sub>N and stirred for 10 minutes, the solvent was evaporated under vacuum. The yield of the target product **3a** decreased significantly, it indicated that the *in situ* generated xanthate ester **6** probably is a key intermediate in the ethoxycarbonylmethylation reaction.

## 2.4 Procedure for emission quenching experiment

Stern-Volmer fluorescence quenching experiments were conducted via adding the appropriate amount of 2-phenyl-2*H*-indazole to a freshly prepared solution of Rhodamine B ( $1 \times 10^{-4}$  M) in dry MeCN in a screw-top quartz cuvette at room

temperature. After degassing with a stream of  $N_2$  for 10 minutes, the sample was irradiated at 365 nm and the fluorescence was measured from 500 nm to 700 nm.

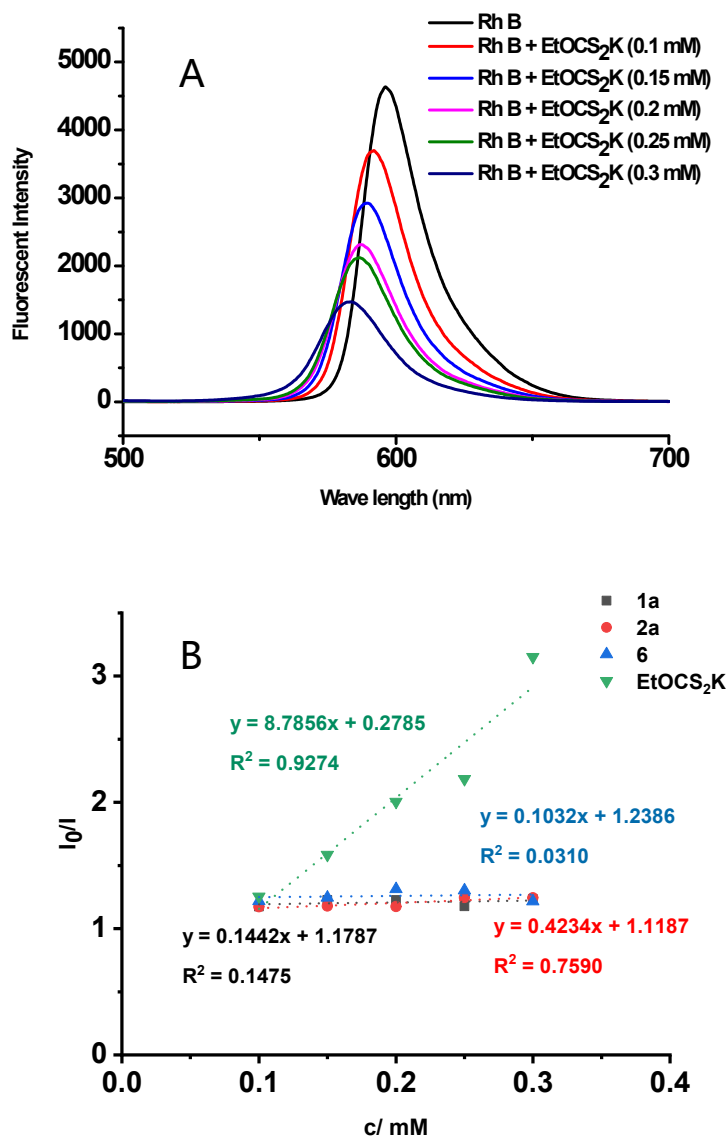

Figure S1. (A) The emission spectra of  $1 \times 10^{-4}$  M solution of Rhodamine B with various concentrations of EtOCS<sub>2</sub>K. (B) The linear relationship between  $I_0/I$  ( $I_0$  and  $I$  are the fluorescence intensities before and after adding the different components of various concentrations, respectively) and the concentration.

## 2.5 Procedure for cyclic voltametric experiment

Cyclic voltammetry analysis of 2*H*-indazole **1a**, ethyl 2-bromoacetate **2a** and EtOCS<sub>2</sub>K were conducted by a potentiostat (CH instrument, 660E) with a three-electrode system (Reference electrode: SCE, working electrode: Glassy carbon,

counter electrode: Pt wire). 0.1 M Bu<sub>4</sub>NPF<sub>6</sub> in CH<sub>3</sub>CN was used as a supporting electrolyte. The Pt disk was polished by using an alumina suspension ( $d = 50$  nm) before each CV experiment.

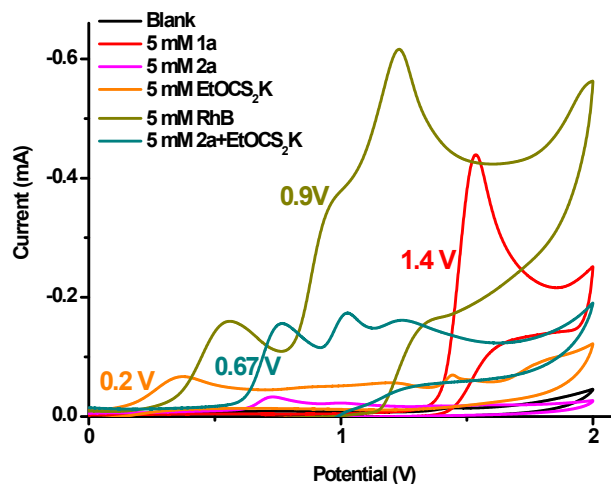

Figure S2. CV of **1a** (5 mM in CH<sub>3</sub>CN), **2a** (5 mM in CH<sub>3</sub>CN), EtOCS<sub>2</sub>K (5 mM in CH<sub>3</sub>CN), RhB (5 mM in CH<sub>3</sub>CN) and blank (only 0.1 M Bu<sub>4</sub>NPF<sub>6</sub>) under nitrogen atmosphere at room temperature. The scan rate was 0.10 V/s, ranging from 0 V to 2 V.

### 3. Procedure and Results of Sensitivity Assessment

#### General Procedure:

The influence of parameter variations as shown in Table S1 on the reaction was investigated. Only one parameter, such as concentration, water level, oxygen level, light intensity, oxidant dosage and catalyst dosage, was deliberately changed per experiment while maintaining the others at the standard level. Each experiment was carried out twice at the same time in order to reduce the error.

**Table S1.** Preparation of sensitivity assessment.

| # | Experiment          | Preparation             |
|---|---------------------|-------------------------|
| 1 | High $c$            | 1.6 mL H <sub>2</sub> O |
| 2 | Low $c$             | 2.4 mL H <sub>2</sub> O |
| 3 | High O <sub>2</sub> | Under air               |
| 4 | Low $I$             | 9W white LED            |
| 5 | High oxidant        | 3 eq DLP                |
| 6 | Low oxidant         | 2 eq DLP                |

|   |               |                    |
|---|---------------|--------------------|
| 7 | High catalyst | 10% Rhodamine B    |
| 8 | Low catalyst  | 5% Rhodamine B     |
| 9 | Control       | Standard procedure |

### Results:

$$\text{Deviation\%} = (\text{Average Y.} - \text{Standard Y.}) / \text{Standard Y.}$$

**Table S2.** Results of sensitivity assessment.

| # | Experiment          | Yield 1 / % | Yield 2 / % | Average Y. / % | Deviation / % |
|---|---------------------|-------------|-------------|----------------|---------------|
| 1 | High <i>c</i>       | 68          | 69          | 69             | -15.9%        |
| 2 | Low <i>c</i>        | 70          | 73          | 72             | -12.2%        |
| 3 | High O <sub>2</sub> | 43          | 45          | 44             | -46.3%        |
| 4 | Low <i>I</i>        | 58          | 56          | 57             | -30.5%        |
| 5 | High oxidant        | 71          | 69          | 70             | -14.6%        |
| 6 | Low oxidant         | 73          | 70          | 71             | -13.4%        |
| 7 | High catalyst       | 66          | 67          | 67             | -18.3%        |
| 8 | Low catalyst        | 71          | 74          | 73             | -11.0%        |
| 9 | Control             | 82          | 81          | 82             | -             |

## 4. Characterization of compounds

*ethyl 2-(2-(p-tolyl)-2H-indazol-3-yl)acetate (3a)*

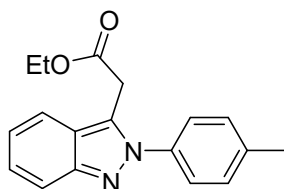

48.0 mg, 82%; Light yellow oil; <sup>1</sup>H NMR (600 MHz, CDCl<sub>3</sub>) δ 7.74 (d, *J* = 8.8 Hz, 1H), 7.66 (d, *J* = 8.5 Hz, 1H), 7.47 (d, *J* = 8.3 Hz, 2H), 7.35 – 7.32 (m, 3H), 7.12 (dd, *J* = 8.1, 6.9 Hz, 1H), 4.14 (q, *J* = 7.1 Hz, 2H), 4.02 (s, 2H), 2.45 (s, 3H), 1.21 (t, *J* = 7.1 Hz, 3H); <sup>13</sup>C NMR (150 MHz, CDCl<sub>3</sub>) δ 169.0, 148.7, 139.4, 137.1, 130.0, 128.4, 126.9, 126.1, 122.0, 119.9, 117.9, 61.7, 31.8, 21.4, 14.2. HRMS (ESI-TOF) *m/z*: [M + H]<sup>+</sup> Calcd for C<sub>18</sub>H<sub>19</sub>N<sub>2</sub>O<sub>2</sub><sup>+</sup> 295.1441, Found: 295.1444.

*ethyl 2-(2-phenyl-2H-indazol-3-yl)acetate (3b)*<sup>[1]</sup>

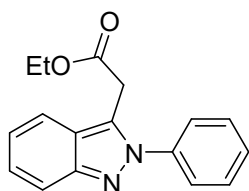



37.0 mg, 62%; Light yellow oil;  $^1\text{H}$  NMR (600 MHz,  $\text{CDCl}_3$ )  $\delta$  7.75 (d,  $J = 8.8$  Hz, 1H), 7.67 (d,  $J = 8.5$  Hz, 1H), 7.62 – 7.60 (m, 2H), 7.56 – 7.53 (m, 2H), 7.52 – 7.49 (m, 1H), 7.34 (ddd,  $J = 8.7, 6.6, 0.9$  Hz, 1H), 7.14 – 7.12 (m, 1H), 4.14 (q,  $J = 7.1$  Hz, 2H), 4.04 (s, 2H), 1.20 (t,  $J = 7.1$  Hz, 3H);  $^{13}\text{C}$  NMR (150 MHz,  $\text{CDCl}_3$ )  $\delta$  169.0, 148.8, 139.6, 129.4, 129.3, 128.4, 127.0, 126.3, 122.1, 122.0, 119.9, 118.0, 61.7, 31.8, 14.2. HRMS (ESI-TOF)  $m/z$ :  $[\text{M} + \text{H}]^+$  Calcd for  $\text{C}_{17}\text{H}_{17}\text{N}_2\text{O}_2^+$  281.1285, Found: 281.1287.

*ethyl 2-(2-(4-ethylphenyl)-2H-indazol-3-yl)acetate (3c)*

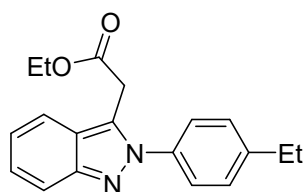

41.3 mg, 67%; Light yellow oil;  $^1\text{H}$  NMR (600 MHz,  $\text{CDCl}_3$ )  $\delta$  7.75 (d,  $J = 8.8$  Hz, 1H), 7.66 (d,  $J = 8.5$  Hz, 1H), 7.50 (d,  $J = 8.3$  Hz, 2H), 7.36 – 7.32 (m, 3H), 7.12 (dd,  $J = 8.0, 6.9$  Hz, 1H), 4.14 (q,  $J = 7.1$  Hz, 2H), 4.03 (s, 2H), 2.75 (q,  $J = 7.6$  Hz, 2H), 1.30 (t,  $J = 7.6$  Hz, 3H), 1.21 (t,  $J = 7.1$  Hz, 3H);  $^{13}\text{C}$  NMR (150 MHz,  $\text{CDCl}_3$ )  $\delta$  169.1, 148.7, 145.6, 137.2, 128.8, 128.3, 126.8, 126.2, 121.9, 119.8, 117.9, 61.7, 31.8, 28.7, 15.6, 14.2. HRMS (ESI-TOF)  $m/z$ :  $[\text{M} + \text{H}]^+$  Calcd for  $\text{C}_{19}\text{H}_{21}\text{N}_2\text{O}_2^+$  309.1598, Found: 309.1600.

*ethyl 2-(2-(4-methoxyphenyl)-2H-indazol-3-yl)acetate (3d)*

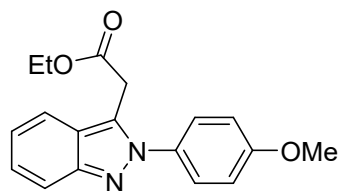

39.0 mg, 63%; Light yellow oil;  $^1\text{H}$  NMR (600 MHz,  $\text{CDCl}_3$ )  $\delta$  7.74 (d,  $J = 8.8$  Hz, 1H), 7.66 (d,  $J = 8.5$  Hz, 1H), 7.53 – 7.50 (m, 2H), 7.35 – 7.32 (m, 1H), 7.12 (dd,  $J = 8.0, 6.9$  Hz, 1H), 7.04 – 7.02 (m, 2H), 4.14 (t,  $J = 7.1$  Hz, 2H), 4.01 (s, 2H), 3.88 (s, 3H), 1.22 (t,  $J = 7.1$  Hz, 3H);  $^{13}\text{C}$  NMR (150 MHz,  $\text{CDCl}_3$ )  $\delta$  169.1, 160.2, 148.6, 132.6, 128.5, 127.6, 126.8, 121.9, 121.8, 119.8, 117.9, 114.5, 61.7, 55.8, 31.8, 14.3.

HRMS (ESI-TOF)  $m/z$ :  $[M + H]^+$  Calcd for  $C_{18}H_{19}N_2O_3^+$  311.1390, Found: 311.1391.

*ethyl 2-(2-(4-fluorophenyl)-2H-indazol-3-yl)acetate (3e)*

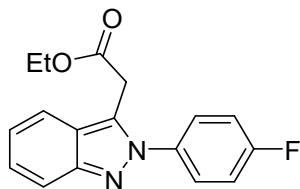

42.0 mg, 70%; Light yellow oil;  $^1H$  NMR (600 MHz,  $CDCl_3$ )  $\delta$  7.73 (d,  $J = 8.8$  Hz, 1H), 7.66 (d,  $J = 8.5$  Hz, 1H), 7.62 – 7.59 (m, 2H), 7.35 – 7.33 (m, 1H), 7.25 – 7.21 (m, 2H), 7.13 (dd,  $J = 8.1, 6.9$  Hz, 1H), 4.14 (q,  $J = 7.1$  Hz, 2H), 4.01 (s, 2H), 1.22 (t,  $J = 7.1$  Hz, 3H);  $^{13}C$  NMR (150 MHz,  $CDCl_3$ )  $\delta$  168.8, 162.9 (d,  $J = 249.0$  Hz), 148.8, 136.2 (d,  $J = 3.0$  Hz), 128.6, 128.2 (d,  $J = 9.0$  Hz), 127.1, 122.2, 121.9, 119.8, 117.9, 116.4 (d,  $J = 22.5$  Hz), 61.8, 31.7, 14.2.  $^{19}F$  NMR (564 MHz,  $CDCl_3$ )  $\delta$  -111.5. HRMS (ESI-TOF)  $m/z$ :  $[M + H]^+$  Calcd for  $C_{17}H_{16}FN_2O_2^+$  299.1190, Found: 299.1189.

*ethyl 2-(2-(4-chlorophenyl)-2H-indazol-3-yl)acetate (3f)*

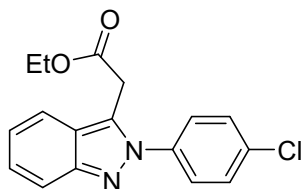

47.8 mg, 76%; Light yellow oil;  $^1H$  NMR (600 MHz,  $CDCl_3$ )  $\delta$  7.73 (d,  $J = 8.8$  Hz, 1H), 7.66 (d,  $J = 8.5$  Hz, 1H), 7.59 – 7.57 (m, 2H), 7.53 – 7.51 (m, 2H), 7.35 (ddd,  $J = 8.6, 6.6, 0.8$  Hz, 1H), 7.13 (dd,  $J = 8.1, 6.9$  Hz, 1H), 4.15 (q,  $J = 7.1$  Hz, 2H), 4.02 (s, 2H), 1.22 (t,  $J = 7.1$  Hz, 3H);  $^{13}C$  NMR (150 MHz,  $CDCl_3$ )  $\delta$  168.9, 148.9, 138.1, 135.3, 129.6, 128.5, 127.5, 127.3, 122.3, 122.1, 119.8, 117.9, 61.9, 31.7, 14.2. HRMS (ESI-TOF)  $m/z$ :  $[M + H]^+$  Calcd for  $C_{17}H_{16}ClN_2O_2^+$  315.0895, Found: 315.0893.

*ethyl 2-(2-(4-bromophenyl)-2H-indazol-3-yl)acetate (3g)*

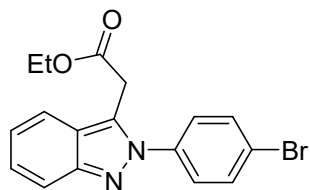

50.8 mg, 71%; Light yellow oil;  $^1\text{H}$  NMR (600 MHz,  $\text{CDCl}_3$ )  $\delta$  7.73 (d,  $J = 8.8$  Hz, 1H), 7.69 – 7.65 (m, 3H), 7.53 – 7.51 (m, 2H), 7.35 (ddd,  $J = 8.6, 6.6, 0.7$  Hz, 1H), 7.13 (dd,  $J = 8.1, 6.9$  Hz, 1H), 4.15 (q,  $J = 7.1$  Hz, 2H), 4.02 (s, 2H), 1.22 (t,  $J = 7.1$  Hz, 3H);  $^{13}\text{C}$  NMR (150 MHz,  $\text{CDCl}_3$ )  $\delta$  168.8, 148.9, 138.6, 132.6, 128.4, 127.8, 127.3, 123.3, 122.3, 122.1, 119.8, 117.9, 61.8, 31.7, 14.2. HRMS (ESI-TOF)  $m/z$ :  $[\text{M} + \text{H}]^+$  Calcd for  $\text{C}_{17}\text{H}_{16}\text{BrN}_2\text{O}_2^+$  359.0390, Found: 359.0392.

*ethyl 2-(2-(4-(trifluoromethyl)phenyl)-2H-indazol-3-yl)acetate (3h)*

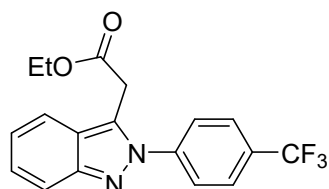

30.2 mg, 43%; Light yellow oil;  $^1\text{H}$  NMR (400 MHz,  $\text{CDCl}_3$ )  $\delta$  7.81 (t,  $J = 5.3$  Hz, 4H), 7.75 (d,  $J = 8.8$  Hz, 1H), 7.68 (d,  $J = 8.5$  Hz, 1H), 7.36 (ddd,  $J = 8.7, 6.6, 0.8$  Hz, 1H), 7.17 – 7.13 (m, 1H), 4.16 (q,  $J = 7.1$  Hz, 2H), 4.06 (s, 2H), 1.22 (t,  $J = 7.1$  Hz, 3H);  $^{13}\text{C}$  NMR (150 MHz,  $\text{CDCl}_3$ )  $\delta$  168.8, 149.2, 142.5, 131.2 (q,  $J = 33.0$  Hz), 128.5, 127.5, 126.7 (q,  $J = 4.5$  Hz), 126.6, 123.8 (q,  $J = 271.5$  Hz), 122.6, 122.4, 119.9, 118.0, 61.9, 31.8, 14.2.  $^{19}\text{F}$  NMR (564 MHz,  $\text{CDCl}_3$ )  $\delta$  -62.6. HRMS (ESI-TOF)  $m/z$ :  $[\text{M} + \text{H}]^+$  Calcd for  $\text{C}_{18}\text{H}_{16}\text{F}_3\text{N}_2\text{O}_2^+$  349.1158, Found: 349.1156.

*ethyl 2-(2-(m-tolyl)-2H-indazol-3-yl)acetate (3i)*

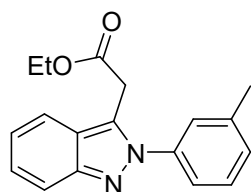

41.8 mg, 71%; Light yellow oil;  $^1\text{H}$  NMR (600 MHz,  $\text{CDCl}_3$ )  $\delta$  7.75 (d,  $J = 8.7$  Hz, 1H), 7.67 (d,  $J = 8.5$  Hz, 1H), 7.43 – 7.38 (m, 3H), 7.35 – 7.31 (m, 2H), 7.13 (dd,  $J = 8.1, 6.9$  Hz, 1H), 4.15 (q,  $J = 7.1$  Hz, 2H), 4.04 (s, 2H), 2.45 (s, 3H), 1.22 (t,  $J = 7.1$

Hz, 3H);  $^{13}\text{C}$  NMR (150 MHz,  $\text{CDCl}_3$ )  $\delta$  169.0, 148.7, 139.7, 139.5, 130.0, 129.1, 128.3, 127.0, 126.9, 123.2, 122.01, 121.99, 119.9, 117.9, 61.7, 31.9, 21.5, 14.2. HRMS (ESI-TOF)  $m/z$ :  $[\text{M} + \text{H}]^+$  Calcd for  $\text{C}_{18}\text{H}_{19}\text{N}_2\text{O}_2^+$  295.1441, Found: 295.1442.

*ethyl 2-(2-(3-fluorophenyl)-2H-indazol-3-yl)acetate (3j)*

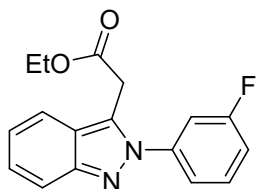

29.9 mg, 50%; Light yellow oil;  $^1\text{H}$  NMR (600 MHz,  $\text{CDCl}_3$ )  $\delta$  7.74 (d,  $J = 8.8$  Hz, 1H), 7.67 (d,  $J = 8.5$  Hz, 1H), 7.51 (td,  $J = 8.1, 6.1$  Hz, 1H), 7.43 (ddd,  $J = 9.2, 6.5, 5.0$  Hz, 2H), 7.35 (dd,  $J = 7.9, 6.9$  Hz, 1H), 7.22 (td,  $J = 8.3, 1.9$  Hz, 1H), 7.14 (dd,  $J = 8.1, 6.9$  Hz, 1H), 4.16 (q,  $J = 7.1$  Hz, 2H), 4.06 (s, 2H), 1.22 (t,  $J = 7.1$  Hz, 3H);  $^{13}\text{C}$  NMR (150 MHz,  $\text{CDCl}_3$ )  $\delta$  168.8, 162.8 (d,  $J = 247.5$  Hz), 148.9, 140.9 (d,  $J = 10.5$  Hz), 130.7 (d,  $J = 9.0$  Hz), 128.4, 127.3, 122.4, 122.2, 121.9 (d,  $J = 3.0$  Hz), 119.8, 118.0, 116.3 (d,  $J = 21.0$  Hz), 114.0 (d,  $J = 25.5$  Hz), 61.8, 31.7, 14.2.  $^{19}\text{F}$  NMR (564 MHz,  $\text{CDCl}_3$ )  $\delta$  -110.5. HRMS (ESI-TOF)  $m/z$ :  $[\text{M} + \text{H}]^+$  Calcd for  $\text{C}_{17}\text{H}_{16}\text{FN}_2\text{O}_2^+$  299.1190, Found: 299.1190.

*ethyl 2-(2-(3-chlorophenyl)-2H-indazol-3-yl)acetate (3k)*

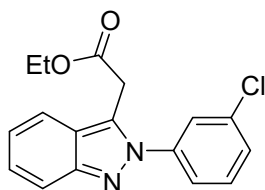

42.8 mg, 68%; Light yellow oil;  $^1\text{H}$  NMR (600 MHz,  $\text{CDCl}_3$ )  $\delta$  7.74 (d,  $J = 8.8$  Hz, 1H), 7.68 (dd,  $J = 10.1, 5.1$  Hz, 2H), 7.55 – 7.54 (m, 1H), 7.50 – 7.47 (m, 2H), 7.35 (dd,  $J = 8.1, 7.1$  Hz, 1H), 7.14 (dd,  $J = 8.1, 6.9$  Hz, 1H), 4.16 (q,  $J = 7.1$  Hz, 2H), 4.05 (s, 2H), 1.23 (t,  $J = 7.1$  Hz, 3H);  $^{13}\text{C}$  NMR (150 MHz,  $\text{CDCl}_3$ )  $\delta$  168.8, 149.0, 140.6, 135.2, 130.4, 129.5, 128.5, 127.4, 126.7, 124.4, 122.4, 122.2, 119.9, 118.0, 61.9, 31.8, 14.2. HRMS (ESI-TOF)  $m/z$ :  $[\text{M} + \text{H}]^+$  Calcd for  $\text{C}_{17}\text{H}_{16}\text{ClN}_2\text{O}_2^+$  315.0895, Found: 315.0894.

*ethyl 2-(2-(3-bromophenyl)-2H-indazol-3-yl)acetate (3l)*

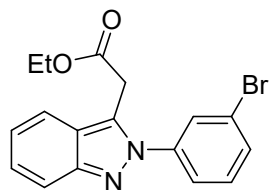

43.0 mg, 60%; Light yellow oil;  $^1\text{H NMR}$  (600 MHz,  $\text{CDCl}_3$ )  $\delta$  7.84 (t,  $J = 1.9$  Hz, 1H), 7.74 (d,  $J = 8.8$  Hz, 1H), 7.67 – 7.64 (m, 2H), 7.59 (dd,  $J = 8.0, 1.0$  Hz, 1H), 7.42 (t,  $J = 8.0$  Hz, 1H), 7.36 – 7.34 (m, 1H), 7.14 (dd,  $J = 8.1, 6.9$  Hz, 1H), 4.16 (q,  $J = 7.1$  Hz, 2H), 4.04 (s, 2H), 1.24 (t,  $J = 7.1$  Hz, 3H);  $^{13}\text{C NMR}$  (150 MHz,  $\text{CDCl}_3$ )  $\delta$  168.8, 149.0, 140.7, 132.4, 130.6, 129.5, 128.5, 127.4, 124.8, 122.9, 122.4, 122.1, 119.9, 118.0, 61.9, 31.8, 14.2. HRMS (ESI-TOF)  $m/z$ :  $[\text{M} + \text{H}]^+$  Calcd for  $\text{C}_{17}\text{H}_{16}\text{BrN}_2\text{O}_2^+$  359.0390, Found: 359.0389.

*ethyl 2-(2-(3,5-dimethylphenyl)-2H-indazol-3-yl)acetate (3m)*

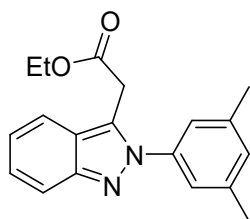

35.2 mg, 57%; Light yellow oil;  $^1\text{H NMR}$  (400 MHz,  $\text{CDCl}_3$ )  $\delta$  7.74 (d,  $J = 8.8$  Hz, 1H), 7.67 (d,  $J = 8.5$  Hz, 1H), 7.34 (dd,  $J = 11.0, 4.3$  Hz, 1H), 7.21 (s, 2H), 7.13 (d,  $J = 6.0$  Hz, 2H), 4.16 (q,  $J = 7.1$  Hz, 2H), 4.04 (s, 2H), 2.40 (s, 6H), 1.22 (t,  $J = 7.1$  Hz, 3H);  $^{13}\text{C NMR}$  (150 MHz,  $\text{CDCl}_3$ )  $\delta$  169.1, 148.6, 139.4, 139.3, 130.9, 128.3, 126.9, 123.9, 122.0, 121.9, 119.9, 117.9, 61.7, 31.9, 21.4, 14.3. HRMS (ESI-TOF)  $m/z$ :  $[\text{M} + \text{H}]^+$  Calcd for  $\text{C}_{19}\text{H}_{21}\text{N}_2\text{O}_2^+$  309.1598, Found: 309.1594.

*ethyl 2-(2-(3-fluoro-4-methylphenyl)-2H-indazol-3-yl)acetate (3n)*

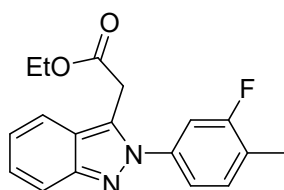

39.3 mg, 63%; Light yellow oil;  $^1\text{H}$  NMR (600 MHz,  $\text{CDCl}_3$ )  $\delta$  7.74 (d,  $J = 8.8$  Hz, 1H), 7.66 (d,  $J = 8.5$  Hz, 1H), 7.36 – 7.31 (m, 4H), 7.13 (dd,  $J = 8.1, 6.9$  Hz, 1H), 4.16 (q,  $J = 7.1$  Hz, 2H), 4.04 (s, 2H), 2.37 (d,  $J = 1.6$  Hz, 3H), 1.23 (t,  $J = 7.1$  Hz, 3H);  $^{13}\text{C}$  NMR (150 MHz,  $\text{CDCl}_3$ )  $\delta$  168.9, 161.0 (d,  $J = 246.0$  Hz), 148.8, 138.4 (d,  $J = 10.5$  Hz), 131.9 (d,  $J = 6.0$  Hz), 128.4, 127.2, 126.4 (d,  $J = 16.5$  Hz), 122.2, 122.0, 121.6 (d,  $J = 4.5$  Hz), 119.8, 117.9, 113.5 (d,  $J = 24.0$  Hz), 61.8, 31.8, 14.6 (d,  $J = 4.5$  Hz), 14.2.  $^{19}\text{F}$  NMR (564 MHz,  $\text{CDCl}_3$ )  $\delta$  -114.4. HRMS (ESI-TOF)  $m/z$ :  $[\text{M} + \text{H}]^+$  Calcd for  $\text{C}_{18}\text{H}_{18}\text{FN}_2\text{O}_2^+$  313.1347, Found: 313.1349.

*ethyl 2-(2-(3,5-difluorophenyl)-2H-indazol-3-yl)acetate (3o)*

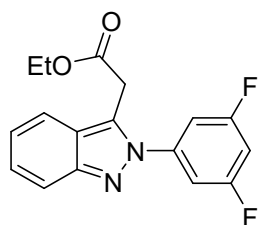

44.6 mg, 71%; Light yellow oil;  $^1\text{H}$  NMR (600 MHz,  $\text{CDCl}_3$ )  $\delta$  7.73 (d,  $J = 8.8$  Hz, 1H), 7.66 (d,  $J = 8.5$  Hz, 1H), 7.37 – 7.35 (m, 1H), 7.29 (dt,  $J = 7.3, 3.6$  Hz, 2H), 7.15 (dd,  $J = 8.1, 7.0$  Hz, 1H), 6.98 (tt,  $J = 8.7, 2.3$  Hz, 1H), 4.18 (q,  $J = 7.1$  Hz, 2H), 4.08 (s, 2H), 1.25 (t,  $J = 7.1$  Hz, 3H);  $^{13}\text{C}$  NMR (150 MHz,  $\text{CDCl}_3$ )  $\delta$  168.7, 163.0 (dd,  $J_1 = 249.0$  Hz,  $J_2 = 13.5$  Hz), 149.1, 141.6 (t,  $J = 13.5$  Hz), 128.5, 127.7, 119.9, 118.0, 110.0 (dd,  $J = 21.0, 6.0$  Hz), 104.8 (t,  $J = 25.5$  Hz), 62.0, 31.7, 14.2;  $^{19}\text{F}$  NMR (564 MHz,  $\text{CDCl}_3$ )  $\delta$  -107.1. HRMS (ESI-TOF)  $m/z$ :  $[\text{M} + \text{H}]^+$  Calcd for  $\text{C}_{17}\text{H}_{15}\text{F}_2\text{N}_2\text{O}_2^+$  317.1096, Found: 345.1097.

*ethyl 2-(5-methoxy-2-phenyl-2H-indazol-3-yl)acetate (3p)*

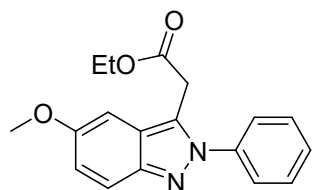

45.1 mg, 73%; Light yellow oil;  $^1\text{H}$  NMR (600 MHz,  $\text{CDCl}_3$ )  $\delta$  7.65 (d,  $J = 9.3$  Hz, 1H), 7.60 – 7.58 (m, 2H), 7.55 – 7.52 (m, 2H), 7.50 – 7.47 (m, 1H), 7.05 (dd,  $J = 9.2,$

2.4 Hz, 1H), 6.84 (d,  $J = 2.2$  Hz, 1H), 4.15 (q,  $J = 7.1$  Hz, 2H), 3.99 (s, 2H), 3.87 (s, 3H), 1.22 (t,  $J = 7.1$  Hz, 3H);  $^{13}\text{C}$  NMR (150 MHz,  $\text{CDCl}_3$ )  $\delta$  169.2, 155.4, 145.7, 139.7, 129.4, 129.1, 127.1, 126.2, 122.1, 121.9, 119.4, 95.8, 61.7, 55.6, 31.8, 14.3. HRMS (ESI-TOF)  $m/z$ :  $[\text{M} + \text{H}]^+$  Calcd for  $\text{C}_{18}\text{H}_{19}\text{N}_2\text{O}_3^+$  311.1390, Found: 311.1386.

*ethyl 2-(5-fluoro-2-phenyl-2H-indazol-3-yl)acetate (3q)*

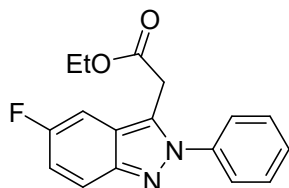

41.2 mg, 69%; Light yellow oil;  $^1\text{H}$  NMR (600 MHz,  $\text{CDCl}_3$ )  $\delta$  7.72 (dd,  $J = 9.2, 4.5$  Hz, 1H), 7.59 – 7.50 (m, 5H), 7.24 (dd,  $J = 8.9, 1.6$  Hz, 1H), 7.14 (td,  $J = 9.2, 1.9$  Hz, 1H), 4.15 (q,  $J = 7.1$  Hz, 2H), 3.98 (s, 2H), 1.22 (t,  $J = 7.1$  Hz, 3H);  $^{13}\text{C}$  NMR (150 MHz,  $\text{CDCl}_3$ )  $\delta$  168.8, 158.5 (d,  $J = 240.0$  Hz), 146.2, 139.4, 129.5, 129.4, 128.5 (d,  $J = 9.0$  Hz), 126.2, 121.3 (d,  $J = 12.0$  Hz), 120.1 (d,  $J = 9.0$  Hz), 118.6 (d,  $J = 28.5$  Hz), 102.4 (d,  $J = 24.0$  Hz), 61.8, 31.8, 14.2.  $^{19}\text{F}$  NMR (564 MHz,  $\text{CDCl}_3$ )  $\delta$  -119.3. HRMS (ESI-TOF)  $m/z$ :  $[\text{M} + \text{H}]^+$  Calcd for  $\text{C}_{17}\text{H}_{16}\text{FN}_2\text{O}_2^+$  299.1190, Found: 299.1191.

*ethyl 2-(5-chloro-2-phenyl-2H-indazol-3-yl)acetate (3r)*

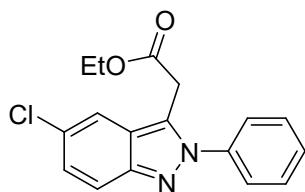

45.8 mg, 73%; Light yellow oil;  $^1\text{H}$  NMR (600 MHz,  $\text{CDCl}_3$ )  $\delta$  7.69 (d,  $J = 9.2$  Hz, 1H), 7.66 (d,  $J = 1.4$  Hz, 1H), 7.60 – 7.51 (m, 5H), 7.28 – 7.26 (m, 1H), 4.16 (q,  $J = 7.1$  Hz, 2H), 3.99 (s, 2H), 1.23 (t,  $J = 7.1$  Hz, 3H);  $^{13}\text{C}$  NMR (150 MHz,  $\text{CDCl}_3$ )  $\delta$  168.7, 147.1, 139.3, 129.6, 129.5, 128.4, 128.2, 127.7, 126.2, 122.4, 119.6, 118.7, 61.9, 31.7, 14.2. HRMS (ESI-TOF)  $m/z$ :  $[\text{M} + \text{H}]^+$  Calcd for  $\text{C}_{17}\text{H}_{16}\text{N}_2\text{O}_2^+$  315.0895, Found: 315.0896.

*ethyl 2-(5-bromo-2-phenyl-2H-indazol-3-yl)acetate (3s)*

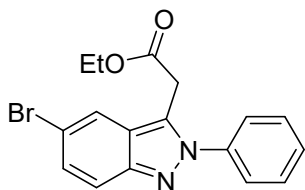

41.6 mg, 58%; Light yellow oil;  $^1\text{H}$  NMR (600 MHz,  $\text{CDCl}_3$ )  $\delta$  7.85 (d,  $J = 1.1$  Hz, 1H), 7.63 (d,  $J = 9.1$  Hz, 1H), 7.59 – 7.51 (m, 5H), 7.39 (dd,  $J = 9.1, 1.7$  Hz, 1H), 4.16 (q,  $J = 7.1$  Hz, 2H), 3.99 (s, 2H), 1.23 (t,  $J = 7.1$  Hz, 3H);  $^{13}\text{C}$  NMR (150 MHz,  $\text{CDCl}_3$ )  $\delta$  168.6, 147.2, 139.3, 130.7, 129.6, 129.5, 128.1, 126.3, 123.3, 122.2, 119.8, 115.6, 61.9, 31.8, 14.2. HRMS (ESI-TOF)  $m/z$ :  $[\text{M} + \text{H}]^+$  Calcd for  $\text{C}_{17}\text{H}_{16}\text{BrN}_2\text{O}_2^+$  359.0390, Found: 359.0387.

*ethyl 2-(6-chloro-2-(p-tolyl)-2H-indazol-3-yl)acetate (3t)*

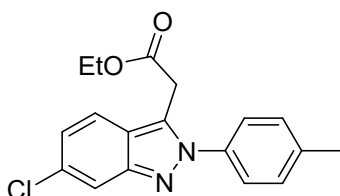

39.5 mg, 60%; Light yellow oil;  $^1\text{H}$  NMR (600 MHz,  $\text{CDCl}_3$ )  $\delta$  7.68 (d,  $J = 9.1$  Hz, 1H), 7.65 (d,  $J = 1.2$  Hz, 1H), 7.45 (d,  $J = 8.2$  Hz, 2H), 7.34 (d,  $J = 8.1$  Hz, 2H), 7.27 (dd,  $J = 9.1, 1.9$  Hz, 1H), 4.16 (q,  $J = 7.1$  Hz, 2H), 3.97 (s, 2H), 2.45 (s, 3H), 1.23 (t,  $J = 7.1$  Hz, 3H);  $^{13}\text{C}$  NMR (150 MHz,  $\text{CDCl}_3$ )  $\delta$  168.8, 147.0, 139.7, 136.8, 130.1, 128.3, 128.2, 127.6, 126.0, 122.4, 119.6, 118.7, 61.9, 31.7, 21.4, 14.2. HRMS (ESI-TOF)  $m/z$ :  $[\text{M} + \text{H}]^+$  Calcd for  $\text{C}_{18}\text{H}_{18}\text{ClN}_2\text{O}_2^+$  329.1051, Found: 329.1051.

*ethyl 2-(6-fluoro-2-(p-tolyl)-2H-indazol-3-yl)acetate (3u)*

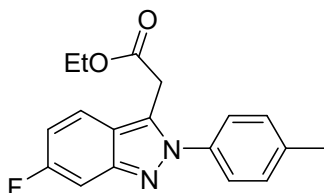

24.3 mg, 39%; Light yellow oil;  $^1\text{H}$  NMR (600 MHz,  $\text{CDCl}_3$ )  $\delta$  7.71 (dd,  $J = 9.3, 4.6$  Hz, 1H), 7.45 (d,  $J = 8.2$  Hz, 2H), 7.33 (d,  $J = 8.1$  Hz, 2H), 7.23 (dd,  $J = 9.0, 2.2$  Hz, 1H), 7.13 (td,  $J = 9.2, 2.4$  Hz, 1H), 4.15 (q,  $J = 7.1$  Hz, 2H), 3.96 (s, 2H), 2.45 (s, 3H), 1.22 (t,  $J = 7.1$  Hz, 3H);  $^{13}\text{C}$  NMR (150 MHz,  $\text{CDCl}_3$ )  $\delta$  168.9, 158.5 (d,  $J = 238.5$  Hz),



146.1, 139.6, 136.9, 130.0, 128.5 (d,  $J = 9.0$  Hz), 126.0, 121.2 (d,  $J = 12.0$  Hz), 120.1 (d,  $J = 10.5$  Hz), 118.5 (d,  $J = 28.5$  Hz), 102.4 (d,  $J = 24.0$  Hz), 61.8, 31.8, 21.4, 14.2.  $^{19}\text{F}$  NMR (564 MHz,  $\text{CDCl}_3$ )  $\delta$  -119.5. HRMS (ESI-TOF)  $m/z$ :  $[\text{M} + \text{H}]^+$  Calcd for  $\text{C}_{18}\text{H}_{18}\text{FN}_2\text{O}_2^+$  313.1347, Found: 313.1336.

*ethyl 2-(6-fluoro-2-(4-methoxyphenyl)-2H-indazol-3-yl)acetate (3v)*

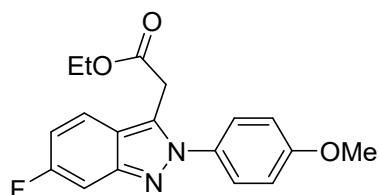

46.0 mg, 70%; Light yellow oil;  $^1\text{H}$  NMR (600 MHz,  $\text{CDCl}_3$ )  $\delta$  7.72 – 7.70 (m, 1H), 7.51 – 7.48 (m, 2H), 7.23 (dd,  $J = 9.0, 2.2$  Hz, 1H), 7.13 (td,  $J = 9.2, 2.4$  Hz, 1H), 7.05 – 7.02 (m, 2H), 4.16 (d,  $J = 7.1$  Hz, 2H), 3.95 (s, 2H), 3.89 (s, 3H), 1.23 (t,  $J = 7.1$  Hz, 3H);  $^{13}\text{C}$  NMR (150 MHz,  $\text{CDCl}_3$ )  $\delta$  168.9, 160.3, 158.5 (d,  $J = 240.0$  Hz), 146.0, 132.4, 128.7 (d,  $J = 9.0$  Hz), 127.5, 121.1 (d,  $J = 10.5$  Hz), 120.0 (d,  $J = 9.0$  Hz), 118.4 (d,  $J = 30.0$  Hz), 114.5, 102.3 (d,  $J = 24.0$  Hz), 61.8, 55.8, 31.8, 14.3;  $^{19}\text{F}$  NMR (564 MHz,  $\text{CDCl}_3$ )  $\delta$  -119.6. HRMS (ESI-TOF)  $m/z$ :  $[\text{M} + \text{H}]^+$  Calcd for  $\text{C}_{18}\text{H}_{18}\text{FN}_2\text{O}_3^+$  329.1296, Found: 329.1298.

*ethyl 2-(2-(4-chlorophenyl)-6-methoxy-2H-indazol-3-yl)acetate (3w)*

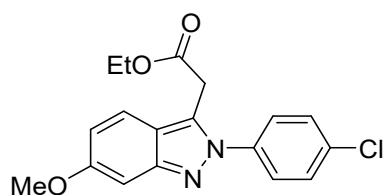

41.2 mg, 60%; Light yellow oil;  $^1\text{H}$  NMR (600 MHz,  $\text{CDCl}_3$ )  $\delta$  7.63 (d,  $J = 9.3$  Hz, 1H), 7.58 – 7.56 (m, 2H), 7.52 – 7.49 (m, 2H), 7.05 (dd,  $J = 9.3, 2.3$  Hz, 1H), 6.82 (d,  $J = 2.2$  Hz, 1H), 4.16 (q,  $J = 7.1$  Hz, 2H), 3.97 (s, 2H), 3.87 (s, 3H), 1.24 (t,  $J = 7.2$  Hz, 3H);  $^{13}\text{C}$  NMR (150 MHz,  $\text{CDCl}_3$ )  $\delta$  169.1, 155.5, 145.8, 138.3, 135.0, 129.6, 127.4, 127.1, 122.5, 122.1, 119.4, 95.7, 61.8, 55.6, 31.8, 14.3. HRMS (ESI-TOF)  $m/z$ :  $[\text{M} + \text{H}]^+$  Calcd for  $\text{C}_{18}\text{H}_{18}\text{ClN}_2\text{O}_3^+$  345.1000, Found: 345.1001.

ethyl 2-(2-methyl-2H-indazol-3-yl)acetate (**3x**)<sup>[2]</sup>

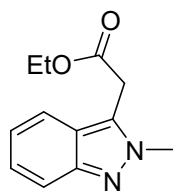

9.2 mg, 21%; White solid, m.p. 66-67 °C; <sup>1</sup>H NMR (400 MHz, CDCl<sub>3</sub>) δ 7.65 (d, *J* = 8.7 Hz, 1H), 7.56 (d, *J* = 8.4 Hz, 1H), 7.28 – 7.24 (m, 1H), 7.08 – 7.03 (m, 1H), 4.17 – 4.12 (m, 5H), 3.99 (s, 2H), 1.23 (t, *J* = 7.1 Hz, 3H); <sup>13</sup>C NMR (100 MHz, CDCl<sub>3</sub>) δ 168.5, 147.8, 127.5, 126.1, 121.5, 121.4, 119.2, 117.2, 61.7, 38.0, 31.0, 14.2. ESI-MS: 218.8 [M + H]<sup>+</sup>

phenyl 2-(2-(*p*-tolyl)-2H-indazol-3-yl)acetate (**3y**)

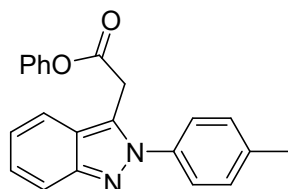

44.8 mg, 65%; Light yellow oil; <sup>1</sup>H NMR (400 MHz, CDCl<sub>3</sub>) δ 7.71 (t, *J* = 9.5 Hz, 2H), 7.46 (d, *J* = 8.2 Hz, 2H), 7.32 – 7.28 (m, 5H), 7.17 – 7.09 (m, 2H), 6.90 (d, *J* = 7.9 Hz, 2H), 4.22 (s, 2H), 2.41 (s, 3H); <sup>13</sup>C NMR (150 MHz, CDCl<sub>3</sub>) δ 167.6, 150.5, 148.7, 139.6, 137.0, 130.1, 129.6, 127.6, 127.0, 126.3, 126.2, 122.3, 122.0, 121.4, 119.7, 118.1, 31.9, 21.4. HRMS (ESI-TOF) *m/z*: [M + H]<sup>+</sup> Calcd for C<sub>22</sub>H<sub>19</sub>N<sub>2</sub>O<sub>2</sub><sup>+</sup> 343.1441, Found: 343.1442.

benzyl 2-(2-(*p*-tolyl)-2H-indazol-3-yl)acetate (**3z**)

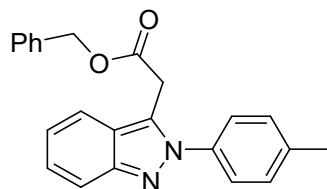

44.4 mg, 76%; Light yellow oil; <sup>1</sup>H NMR (600 MHz, CDCl<sub>3</sub>) δ 7.74 (d, *J* = 8.7 Hz, 1H), 7.62 (d, *J* = 8.4 Hz, 1H), 7.39 (d, *J* = 8.0 Hz, 2H), 7.33 (dd, *J* = 7.6, 4.5 Hz, 4H), 7.24 (d, *J* = 6.8 Hz, 4H), 7.11 – 7.09 (m, 1H), 5.11 (s, 2H), 4.06 (s, 2H), 2.42 (s, 3H); <sup>13</sup>C NMR (150 MHz, CDCl<sub>3</sub>) δ 168.8, 148.6, 139.4, 137.0, 135.4, 130.0, 128.7, 128.6,

128.5, 127.0, 126.1, 122.1, 122.0, 119.8, 117.9, 67.4, 31.8, 21.4. HRMS (ESI-TOF)  $m/z$ :  $[M + H]^+$  Calcd for  $C_{23}H_{21}N_2O_2^+$  357.1598, Found: 357.1596.

*tert*-butyl 2-(2-(*p*-tolyl)-2*H*-indazol-3-yl)acetate (**3aa**)

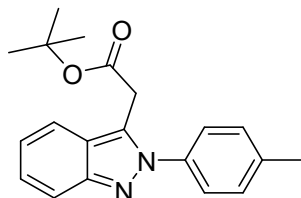

22 mg, 34%; Light yellow oil;  $^1H$  NMR (600 MHz,  $CDCl_3$ )  $\delta$  7.73 (d,  $J = 8.7$  Hz, 1H), 7.68 (d,  $J = 8.5$  Hz, 1H), 7.49 (d,  $J = 8.2$  Hz, 2H), 7.34 – 7.31 (m, 3H), 7.11 (dd,  $J = 8.1, 6.9$  Hz, 1H), 3.94 (s, 2H), 2.45 (s, 3H), 1.39 (s, 9H);  $^{13}C$  NMR (150 MHz,  $CDCl_3$ )  $\delta$  168.2, 148.7, 139.3, 137.2, 129.9, 129.0, 126.8, 126.1, 122.0, 121.8, 120.0, 117.9, 82.1, 33.1, 28.0, 21.4. HRMS (ESI-TOF)  $m/z$ :  $[M + H]^+$  Calcd for  $C_{20}H_{23}N_2O_2^+$  323.1754, Found: 323.1755.

*N*-phenyl-2-(2-(*p*-tolyl)-2*H*-indazol-3-yl)acetamide (**3ab**)

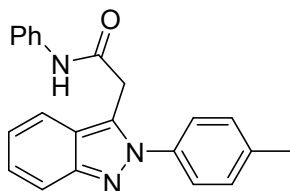

44.2 mg, 65%; Light yellow oil;  $^1H$  NMR (600 MHz,  $CDCl_3$ )  $\delta$  7.80 (d,  $J = 8.8$  Hz, 1H), 7.70 (d,  $J = 8.5$  Hz, 1H), 7.44 (d,  $J = 8.2$  Hz, 2H), 7.40 – 7.38 (m, 1H), 7.35 – 7.31 (m, 4H), 7.28 (d,  $J = 7.5$  Hz, 2H), 7.19 (dd,  $J = 13.9, 6.6$  Hz, 2H), 7.11 (t,  $J = 7.3$  Hz, 1H), 4.13 (s, 2H), 2.45 (s, 3H);  $^{13}C$  NMR (150 MHz,  $CDCl_3$ )  $\delta$  166.0, 148.9, 139.8, 137.2, 136.8, 130.3, 129.2, 128.4, 127.3, 125.8, 125.1, 123.0, 122.0, 120.3, 119.2, 118.4, 34.7, 21.4. HRMS (ESI-TOF)  $m/z$ :  $[M + H]^+$  Calcd for  $C_{22}H_{20}N_3O^+$  342.1601, Found: 342.1600.

*N*-(*p*-tolyl)-2-(2-(*p*-tolyl)-2*H*-indazol-3-yl)acetamide (**3ac**)

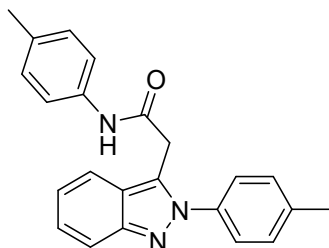

44.2 mg, 62%; Light yellow oil;  $^1\text{H}$  NMR (600 MHz,  $\text{CDCl}_3$ )  $\delta$  7.80 (d,  $J = 8.8$  Hz, 1H), 7.69 (d,  $J = 8.4$  Hz, 1H), 7.44 (d,  $J = 8.0$  Hz, 2H), 7.40 – 7.37 (m, 1H), 7.34 (d,  $J = 7.9$  Hz, 2H), 7.21 – 7.18 (m, 3H), 7.08 (d,  $J = 8.2$  Hz, 3H), 4.12 (s, 2H), 2.45 (s, 3H), 2.29 (s, 3H);  $^{13}\text{C}$  NMR (100 MHz,  $\text{CDCl}_3$ )  $\delta$  165.9, 149.0, 139.8, 136.9, 134.8, 134.7, 130.3, 129.7, 128.5, 127.3, 125.9, 123.0, 122.1, 120.4, 119.2, 118.4, 34.7, 29.9, 21.4, 21.0. HRMS (ESI-TOF)  $m/z$ :  $[\text{M} + \text{H}]^+$  Calcd for  $\text{C}_{23}\text{H}_{22}\text{N}_3\text{O}^+$  356.1757, Found: 356.1758.

*N*-(4-ethylphenyl)-2-(2-(*p*-tolyl)-2H-indazol-3-yl)acetamide (**3ad**)

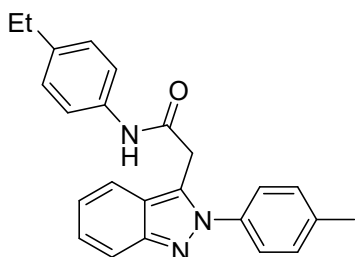

41.1 mg, 56%; Light yellow oil;  $^1\text{H}$  NMR (600 MHz,  $\text{CDCl}_3$ )  $\delta$  7.79 (d,  $J = 8.7$  Hz, 1H), 7.69 (d,  $J = 8.5$  Hz, 1H), 7.44 (d,  $J = 7.9$  Hz, 2H), 7.39 – 7.37 (m, 1H), 7.33 (d,  $J = 7.9$  Hz, 2H), 7.23 (d,  $J = 8.1$  Hz, 2H), 7.18 (t,  $J = 7.2$  Hz, 2H), 7.10 (d,  $J = 8.1$  Hz, 2H), 4.11 (s, 2H), 2.59 (q,  $J = 7.6$  Hz, 2H), 2.44 (s, 3H), 1.19 (t,  $J = 7.6$  Hz, 3H);  $^{13}\text{C}$  NMR (150 MHz,  $\text{CDCl}_3$ )  $\delta$  165.9, 148.9, 141.2, 139.8, 136.8, 134.8, 130.3, 128.53, 128.47, 127.3, 125.8, 122.9, 122.0, 120.5, 119.2, 118.3, 34.6, 28.4, 21.4, 15.8. HRMS (ESI-TOF)  $m/z$ :  $[\text{M} + \text{H}]^+$  Calcd for  $\text{C}_{24}\text{H}_{24}\text{N}_3\text{O}^+$  370.1914, Found: 370.1915.

*N*-(4-methoxyphenyl)-2-(2-(*p*-tolyl)-2H-indazol-3-yl)acetamide (**3ae**)

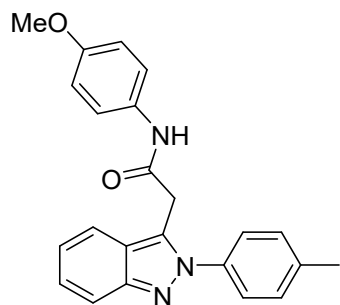

28.3 mg, 38%; Light yellow oil;  $^1\text{H}$  NMR (600 MHz,  $\text{CDCl}_3$ )  $\delta$  7.80 (d,  $J = 8.8$  Hz, 1H), 7.69 (d,  $J = 8.5$  Hz, 1H), 7.44 (d,  $J = 8.3$  Hz, 2H), 7.38 (dd,  $J = 7.9, 6.8$  Hz, 1H), 7.34 (d,  $J = 8.1$  Hz, 2H), 7.23 – 7.21 (m, 2H), 7.19 (dd,  $J = 8.1, 6.9$  Hz, 1H), 7.09 (s, 1H), 6.82 – 6.79 (m, 2H), 4.11 (s, 2H), 3.76 (s, 3H), 2.45 (s, 3H);  $^{13}\text{C}$  NMR (100 MHz,  $\text{CDCl}_3$ )  $\delta$  165.9, 157.1, 149.0, 139.8, 136.9, 130.3, 128.6, 127.3, 125.8, 122.9, 122.3, 122.1, 119.2, 118.4, 114.3, 55.6, 34.5, 21.4. HRMS (ESI-TOF)  $m/z$ :  $[\text{M} + \text{H}]^+$  Calcd for  $\text{C}_{23}\text{H}_{22}\text{N}_3\text{O}_2^+$  372.1707, Found: 372.1707.

*N*-(4-(*tert*-butyl)phenyl)-2-(2-(*p*-tolyl)-2*H*-indazol-3-yl)acetamide (**3af**)

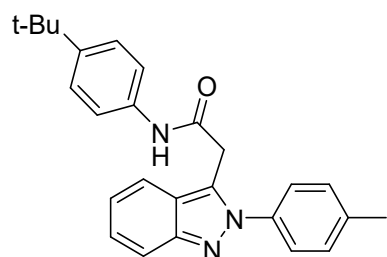

58.0 mg, 73%; Light yellow oil;  $^1\text{H}$  NMR (600 MHz,  $\text{CDCl}_3$ )  $\delta$  7.77 (d,  $J = 8.8$  Hz, 1H), 7.66 (d,  $J = 8.5$  Hz, 1H), 7.43 (d,  $J = 8.2$  Hz, 2H), 7.37 (t,  $J = 7.3$  Hz, 2H), 7.29 (dd,  $J = 15.3, 8.5$  Hz, 5H), 7.25 (d,  $J = 7.9$  Hz, 1H), 7.16 (dd,  $J = 8.0, 7.0$  Hz, 1H), 4.08 (s, 2H), 2.43 (s, 3H), 1.27 (s, 9H);  $^{13}\text{C}$  NMR (150 MHz,  $\text{CDCl}_3$ )  $\delta$  166.0, 148.9, 148.1, 139.7, 136.8, 134.6, 130.2, 128.6, 127.3, 126.0, 125.8, 122.8, 122.0, 120.1, 119.3, 118.2, 34.51, 34.48, 31.4, 21.4. HRMS (ESI-TOF)  $m/z$ :  $[\text{M} + \text{H}]^+$  Calcd for  $\text{C}_{26}\text{H}_{28}\text{N}_3\text{O}^+$  398.2227, Found: 398.2229.

*N*-(4-chlorophenyl)-2-(2-(*p*-tolyl)-2*H*-indazol-3-yl)acetamide (**3ag**)

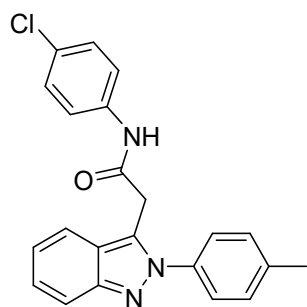

41.2 mg, 55%; Light yellow oil;  $^1\text{H}$  NMR (600 MHz,  $\text{CDCl}_3$ )  $\delta$  7.79 (d,  $J = 8.8$  Hz, 1H), 7.67 (d,  $J = 8.5$  Hz, 1H), 7.41 (d,  $J = 8.2$  Hz, 2H), 7.38 (d,  $J = 8.1$  Hz, 1H), 7.33 (d,  $J = 8.1$  Hz, 2H), 7.28 (d,  $J = 8.9$  Hz, 2H), 7.25 – 7.21 (m, 3H), 7.19 (dd,  $J = 8.0$ , 7.0 Hz, 1H), 4.11 (s, 2H), 2.44 (s, 3H);  $^{13}\text{C}$  NMR (100 MHz,  $\text{CDCl}_3$ )  $\delta$  166.0, 149.0, 139.9, 136.8, 135.8, 130.3, 130.1, 129.2, 128.2, 127.3, 125.8, 123.1, 122.0, 121.5, 119.1, 118.4, 34.6, 21.4. HRMS (ESI-TOF)  $m/z$ :  $[\text{M} + \text{H}]^+$  Calcd for  $\text{C}_{22}\text{H}_{19}\text{ClN}_3\text{O}^+$  376.1211, Found: 376.1213.

*2-(2-(p-tolyl)-2H-indazol-3-yl)-N-(4-(trifluoromethyl)phenyl)acetamide(3ah)*

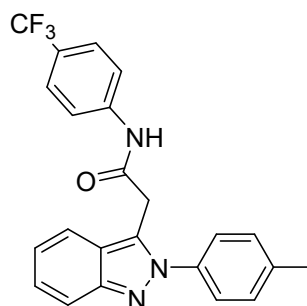

46.7 mg, 57%; Light yellow oil;  $^1\text{H}$  NMR (600 MHz,  $\text{CDCl}_3$ )  $\delta$  7.80 (d,  $J = 8.8$  Hz, 1H), 7.67 (d,  $J = 8.5$  Hz, 1H), 7.53 (d,  $J = 8.6$  Hz, 2H), 7.46 (d,  $J = 8.5$  Hz, 2H), 7.42 – 7.38 (m, 3H), 7.34 (d,  $J = 8.1$  Hz, 3H), 7.22 – 7.19 (m, 1H), 4.15 (s, 2H), 2.45 (s, 3H);  $^{13}\text{C}$  NMR (150 MHz,  $\text{CDCl}_3$ )  $\delta$  166.2, 149.0, 140.2, 140.0, 136.7, 130.4, 127.9, 127.4, 126.8 (q,  $J = 33.0$  Hz), 126.4 (q,  $J = 3.0$  Hz), 125.8, 124.1 (q,  $J = 240.0$  Hz), 123.2, 122.0, 119.7, 119.0, 118.5, 34.7, 21.2.  $^{19}\text{F}$  NMR (564 MHz,  $\text{CDCl}_3$ )  $\delta$  -62.3. HRMS (ESI-TOF)  $m/z$ :  $[\text{M} + \text{H}]^+$  Calcd for  $\text{C}_{23}\text{H}_{19}\text{F}_3\text{N}_3\text{O}^+$  410.1475, Found: 410.1475.

*N-benzyl-2-(2-(p-tolyl)-2H-indazol-3-yl)acetamide(3ai)*

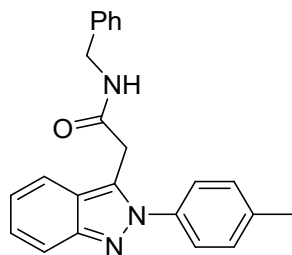

27.0 mg, 38%; Light yellow oil;  $^1\text{H}$  NMR (600 MHz,  $\text{CDCl}_3$ )  $\delta$  7.75 (d,  $J = 8.7$  Hz, 1H), 7.61 (d,  $J = 8.4$  Hz, 1H), 7.36 – 7.34 (m, 3H), 7.30 – 7.24 (m, 5H), 7.14 (t,  $J = 7.5$  Hz, 3H), 5.80 (s, 1H), 4.38 (d,  $J = 5.9$  Hz, 2H), 4.01 (s, 2H), 2.44 (s, 3H);  $^{13}\text{C}$  NMR (150 MHz,  $\text{CDCl}_3$ )  $\delta$  167.8, 148.8, 139.6, 137.8, 136.8, 130.2, 128.8, 128.7, 127.84, 127.78, 127.2, 125.7, 122.6, 122.0, 119.4, 118.2, 43.9, 33.6, 21.4. HRMS (ESI-TOF)  $m/z$ :  $[\text{M} + \text{H}]^+$  Calcd for  $\text{C}_{23}\text{H}_{22}\text{N}_3\text{O}^+$  356.1757, Found: 356.1755.

*N,N*-dimethyl-2-(2-(*p*-tolyl)-2*H*-indazol-3-yl)acetamide (**3aj**)

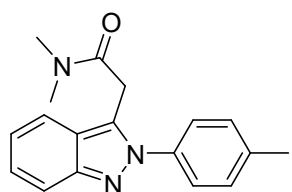

37.0 mg, 63%; Light yellow oil;  $^1\text{H}$  NMR (600 MHz,  $\text{CDCl}_3$ )  $\delta$  7.73 (d,  $J = 8.8$  Hz, 1H), 7.63 (d,  $J = 8.5$  Hz, 1H), 7.45 (d,  $J = 8.2$  Hz, 2H), 7.33 – 7.30 (m, 3H), 7.08 (dd,  $J = 8.0, 7.0$  Hz, 1H), 4.05 (s, 2H), 2.95 (s, 3H), 2.85 (s, 3H), 2.45 (s, 3H);  $^{13}\text{C}$  NMR (150 MHz,  $\text{CDCl}_3$ )  $\delta$  168.2, 148.8, 139.3, 137.3, 130.0, 129.5, 126.8, 126.0, 121.9, 120.0, 117.9, 37.6, 36.0, 31.7, 21.4. HRMS (ESI-TOF)  $m/z$ :  $[\text{M} + \text{H}]^+$  Calcd for  $\text{C}_{18}\text{H}_{20}\text{N}_3\text{O}^+$  294.1601, Found: 294.1602.

*((3aR,5aS,8aS,8bR)*-2,2,7,7-tetramethyltetrahydro-3*aH*-bis([1,3]dioxolo)[4,5-*b*:4',5'-*d*]pyran-3*a*-yl)methyl 2-(2-(*p*-tolyl)-2*H*-indazol-3-yl)acetate (**3ak**)

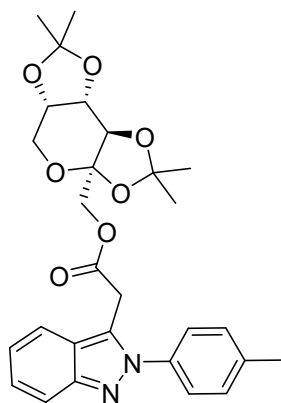

35.6 mg, 35%; Light yellow oil;  $^1\text{H}$  NMR (400 MHz,  $\text{CDCl}_3$ )  $\delta$  7.73 (d,  $J = 8.8$  Hz, 1H), 7.63 (d,  $J = 8.5$  Hz, 1H), 7.45 – 7.42 (m, 2H), 7.34 – 7.30 (m, 3H), 7.12 (ddd,  $J = 8.4, 6.6, 0.6$  Hz, 1H), 4.55 (dd,  $J = 7.9, 2.6$  Hz, 1H), 4.38 (d,  $J = 11.7$  Hz, 1H), 4.21 (dd,  $J = 7.9, 1.1$  Hz, 1H), 4.10 – 4.08 (m, 3H), 4.06 (d,  $J = 11.7$  Hz, 1H), 3.87 (dd,  $J = 13.0, 1.8$  Hz, 1H), 3.74 (d,  $J = 13.0$  Hz, 1H), 2.45 (s, 3H), 1.46 (s, 6H), 1.34 (s, 3H), 0.98 (s, 3H).  $^{13}\text{C}$  NMR (100 MHz,  $\text{CDCl}_3$ )  $\delta$  168.4, 148.7, 139.5, 130.1, 127.9, 126.9, 126.1, 122.1, 122.0, 119.6, 118.0, 109.3, 108.9, 101.3, 70.8, 70.5, 70.1, 66.3, 61.4, 31.5, 26.5, 26.0, 24.8, 24.2, 21.4. HRMS (ESI-TOF)  $m/z$ :  $[\text{M} + \text{H}]^+$  Calcd for  $\text{C}_{28}\text{H}_{33}\text{N}_2\text{O}_7^+$  509.2282, Found: 509.2283.

*ethyl 2-(2-phenylimidazo[1,2-a]pyridin-3-yl)acetate (5a)*<sup>[3]</sup>

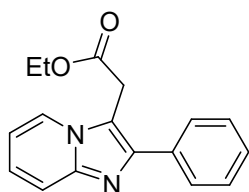

26.3 mg, 47%; Light yellow oil;  $^1\text{H}$  NMR (600 MHz,  $\text{CDCl}_3$ )  $\delta$  8.13 (d,  $J = 6.9$  Hz, 1H), 7.85 – 7.84 (m, 2H), 7.67 (d,  $J = 9.0$  Hz, 1H), 7.49 – 7.47 (m, 2H), 7.40 – 7.37 (m, 1H), 7.23 (ddd,  $J = 9.0, 6.7, 1.2$  Hz, 1H), 6.87 (td,  $J = 6.8, 1.1$  Hz, 1H), 4.23 (q,  $J = 7.1$  Hz, 2H), 4.05 (s, 2H), 1.28 (t,  $J = 7.1$  Hz, 3H);  $^{13}\text{C}$  NMR (150 MHz,  $\text{CDCl}_3$ )  $\delta$  169.6, 145.2, 144.8, 134.2, 128.8, 128.7, 128.0, 124.6, 123.9, 117.8, 113.1, 112.5, 61.8, 31.0, 14.3. HRMS (ESI-TOF)  $m/z$ :  $[\text{M} + \text{H}]^+$  Calcd for  $\text{C}_{17}\text{H}_{17}\text{N}_2\text{O}_2^+$  281.1285, Found: 281.1285.



ethyl 2-(2-(4-(trifluoromethyl)phenyl)imidazo[1,2-a]pyridin-3-yl)acetate (**5b**)<sup>[3]</sup>

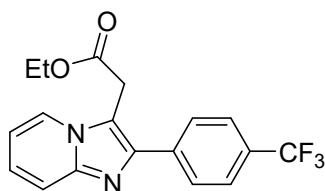

35.6 mg, 51%; Light yellow oil; <sup>1</sup>H NMR (600 MHz, CDCl<sub>3</sub>) δ 8.17 (d, *J* = 6.9 Hz, 1H), 8.00 (d, *J* = 8.1 Hz, 2H), 7.74 (d, *J* = 8.2 Hz, 2H), 7.69 (d, *J* = 9.1 Hz, 1H), 7.29 – 7.27 (m, 1H), 6.91 (td, *J* = 6.8, 0.9 Hz, 1H), 4.24 (q, *J* = 7.1 Hz, 2H), 4.05 (s, 2H), 1.29 (t, *J* = 7.1 Hz, 3H); <sup>13</sup>C NMR (150 MHz, CDCl<sub>3</sub>) δ 169.2, 145.4, 143.3, 137.8, 130.0(q, *J* = 33.0 Hz), 128.9, 125.7 (q, *J* = 3.0 Hz), 125.2, 124.4 (q, *J* = 271.5 Hz), 124.0, 118.0, 113.9, 112.9, 62.0, 31.0, 14.3. <sup>19</sup>F NMR (564 MHz, CDCl<sub>3</sub>) δ -62.5. HRMS (ESI-TOF) *m/z*: [M + H]<sup>+</sup> Calcd for C<sub>18</sub>H<sub>16</sub>F<sub>3</sub>N<sub>2</sub>O<sub>2</sub><sup>+</sup> 349.1158, Found: 349.1157.

*N,N*-dimethyl-2-(6-methyl-2-(*p*-tolyl)imidazo[1,2-*a*]pyridin-3-yl)acetamide (**5c**)<sup>[4]</sup>

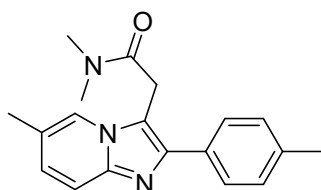

31.2 mg, 51%; Light yellow oil; <sup>1</sup>H NMR (600 MHz, CDCl<sub>3</sub>) δ 8.01 (s, 1H), 7.54 (t, *J* = 9.2 Hz, 3H), 7.27 (s, 1H), 7.25 (s, 1H), 7.04 (dd, *J* = 9.1, 1.5 Hz, 1H), 4.09 (s, 2H), 2.94 (s, 3H), 2.88 (s, 3H), 2.40 (s, 3H), 2.35 (s, 3H). <sup>13</sup>C NMR (150 MHz, CDCl<sub>3</sub>) δ 168.5, 144.3, 137.6, 131.9, 129.5, 128.6, 127.7, 122.4, 121.9, 116.8, 113.7, 37.7, 36.0, 30.5, 21.4, 18.6. HRMS (ESI-TOF) *m/z*: [M + H]<sup>+</sup> Calcd for C<sub>19</sub>H<sub>22</sub>N<sub>3</sub>O<sup>+</sup> 308.1757, Found: 308.1757.

## 5. NMR copies of products

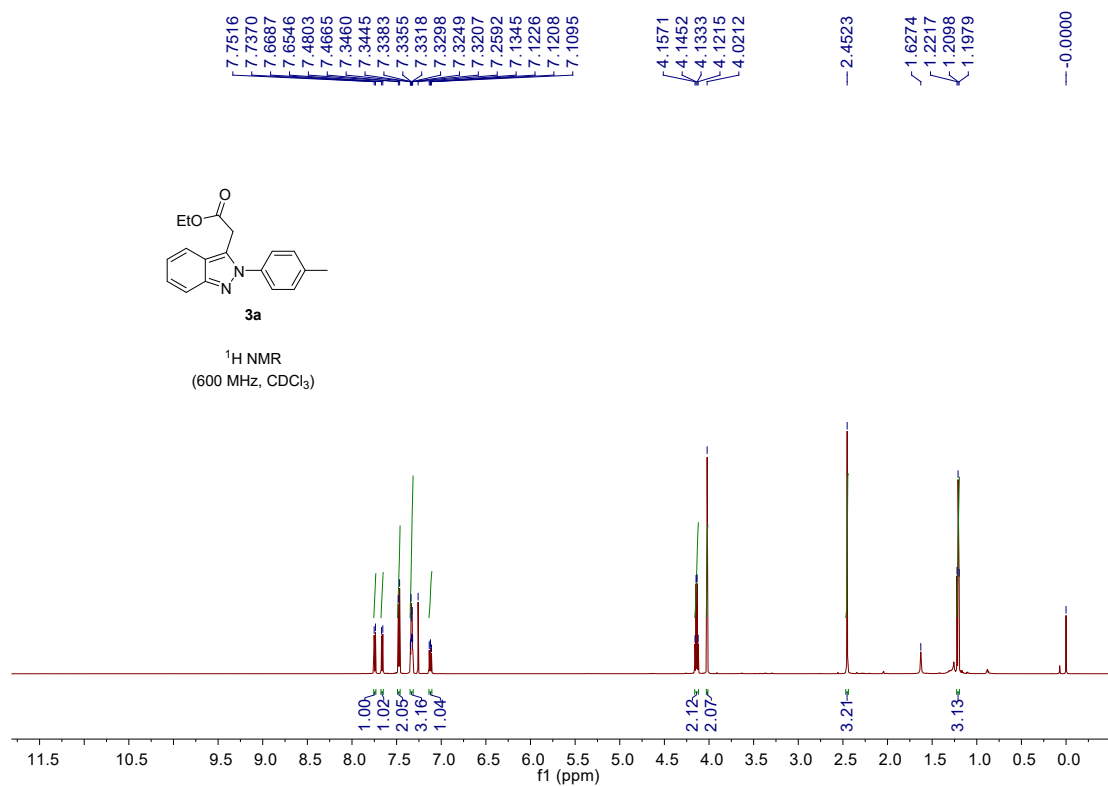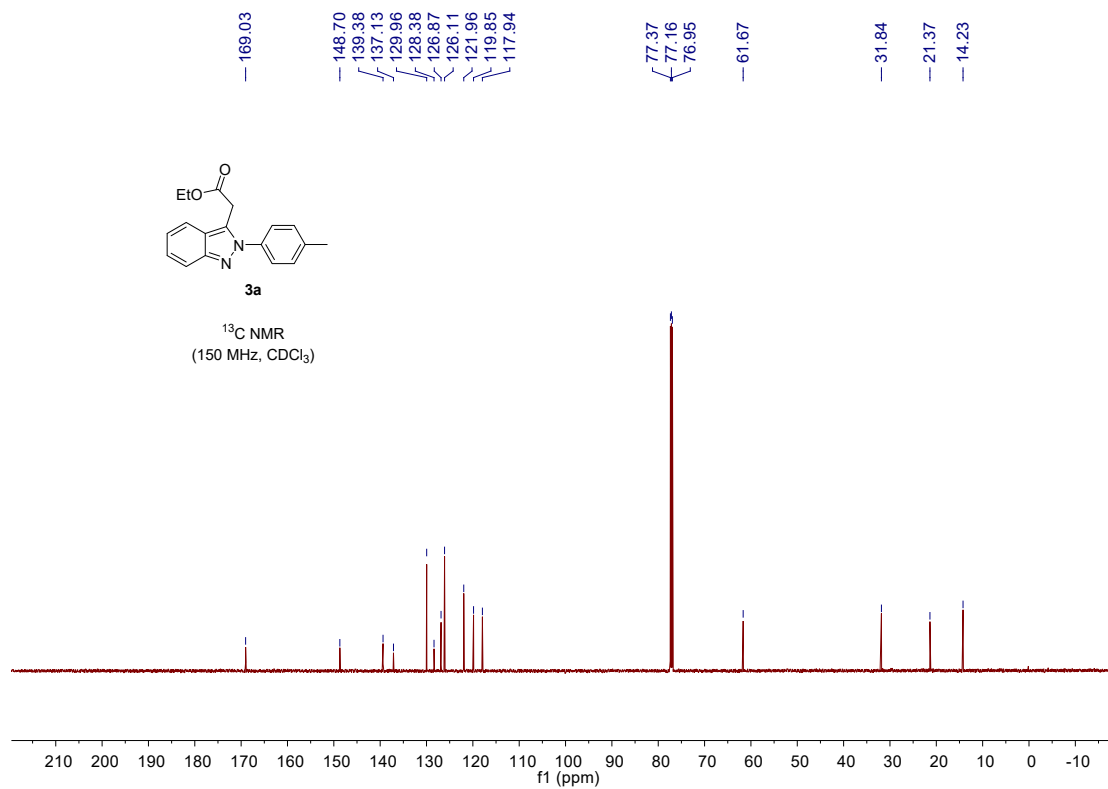

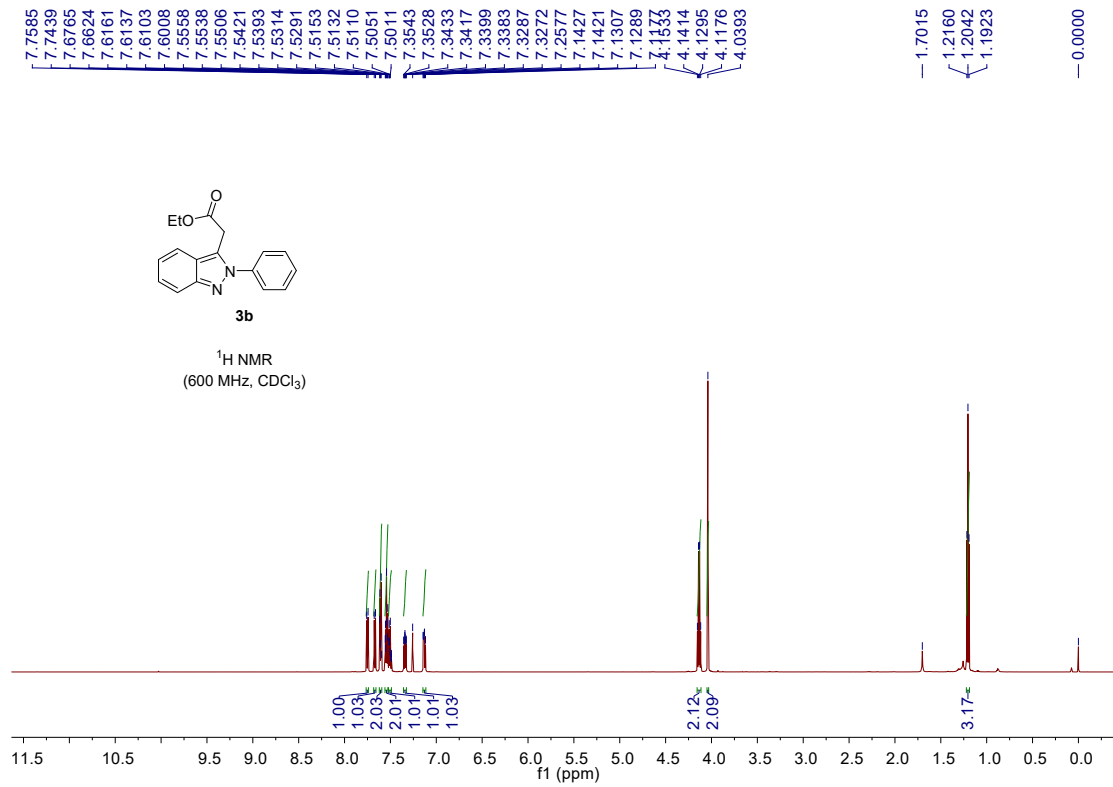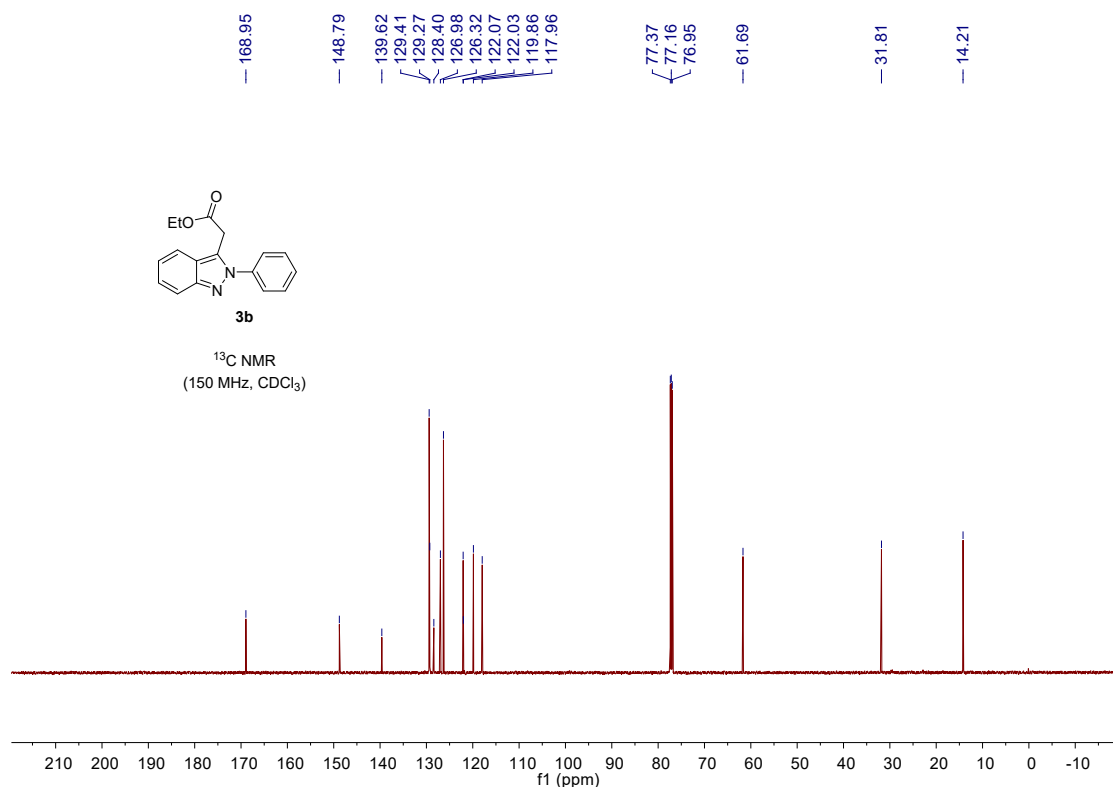

7.7536  
7.7390  
7.6717  
7.6576  
7.5094  
7.4956  
7.3623  
7.3482  
7.3359  
7.3344  
7.3327  
7.3311  
7.3214  
7.3200  
7.2596  
7.1351  
7.1236  
7.1217  
7.1104

4.1591  
4.1472  
4.1354  
4.1235  
4.0343

2.7683  
2.7556  
2.7429  
2.7302

1.3084  
1.2957  
1.2830  
1.2211  
1.2093  
1.1974

— 0.0020

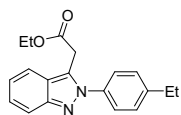

**3c**

<sup>1</sup>H NMR  
(600 MHz, CDCl<sub>3</sub>)

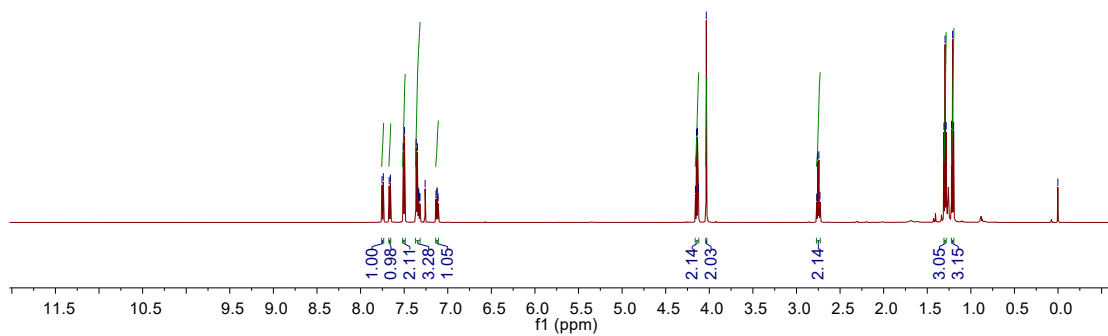

169.05

148.66  
145.63

137.23  
128.79  
128.34  
126.84  
126.15  
121.94  
119.84  
117.91

77.37  
77.16  
76.95

61.66

31.83  
28.71

15.62  
14.22

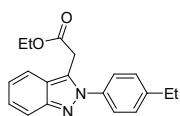

**3c**

<sup>13</sup>C NMR  
(150 MHz, CDCl<sub>3</sub>)

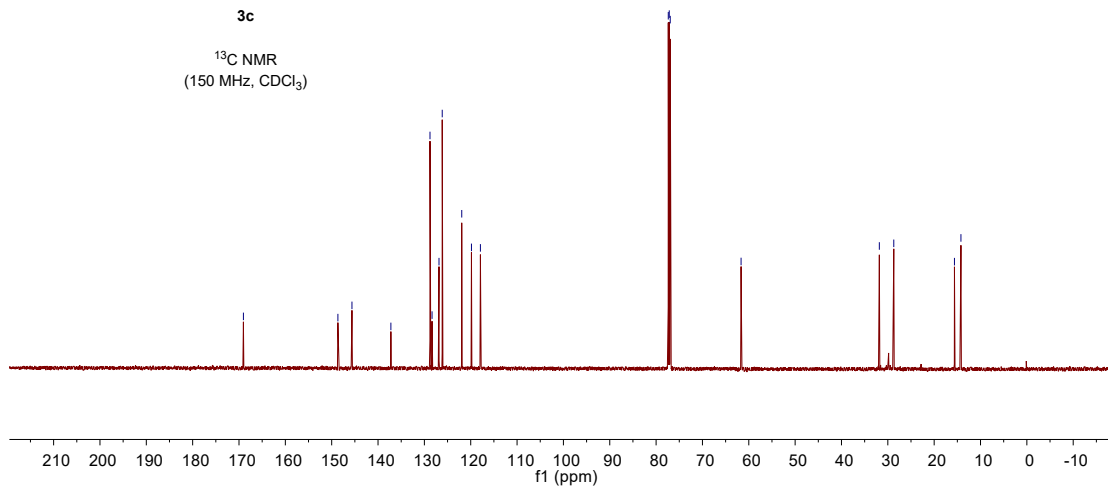

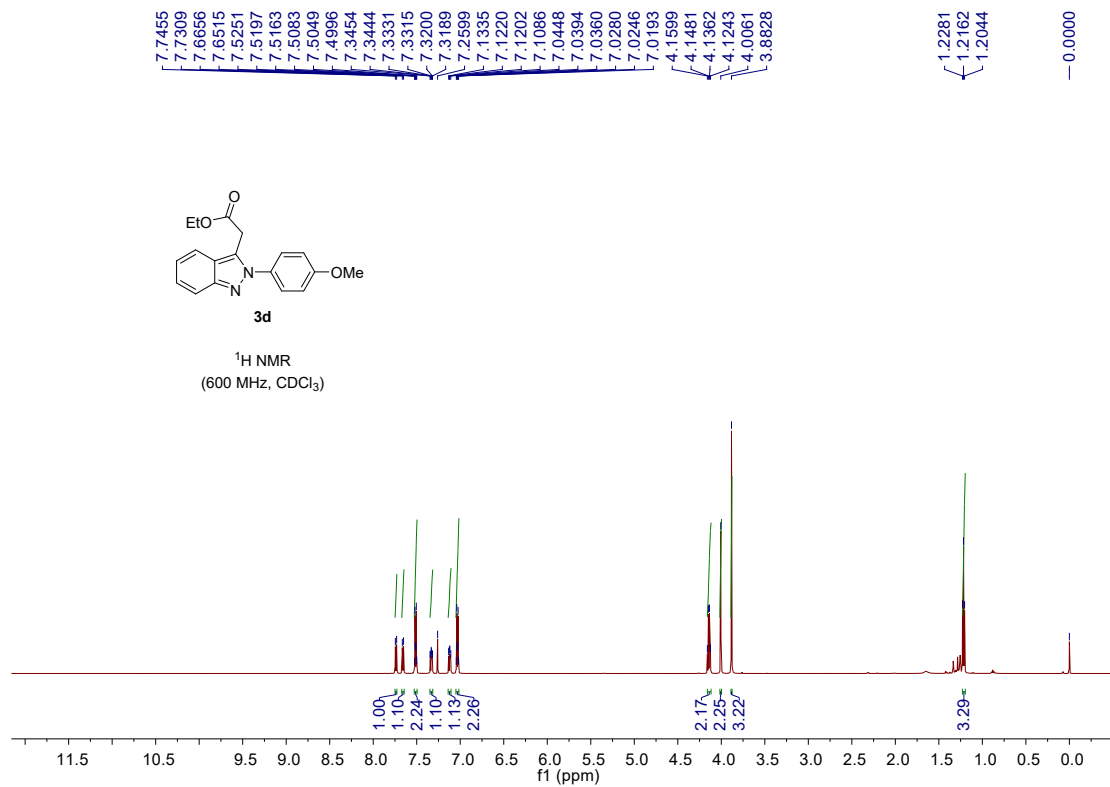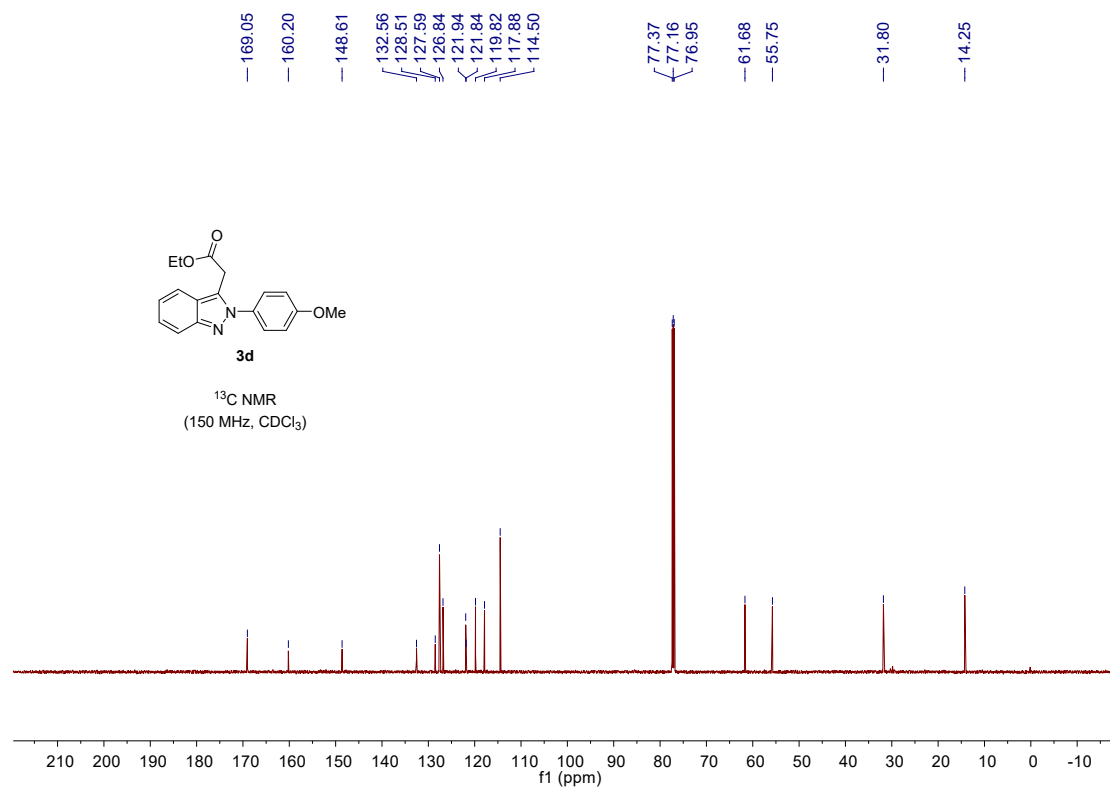

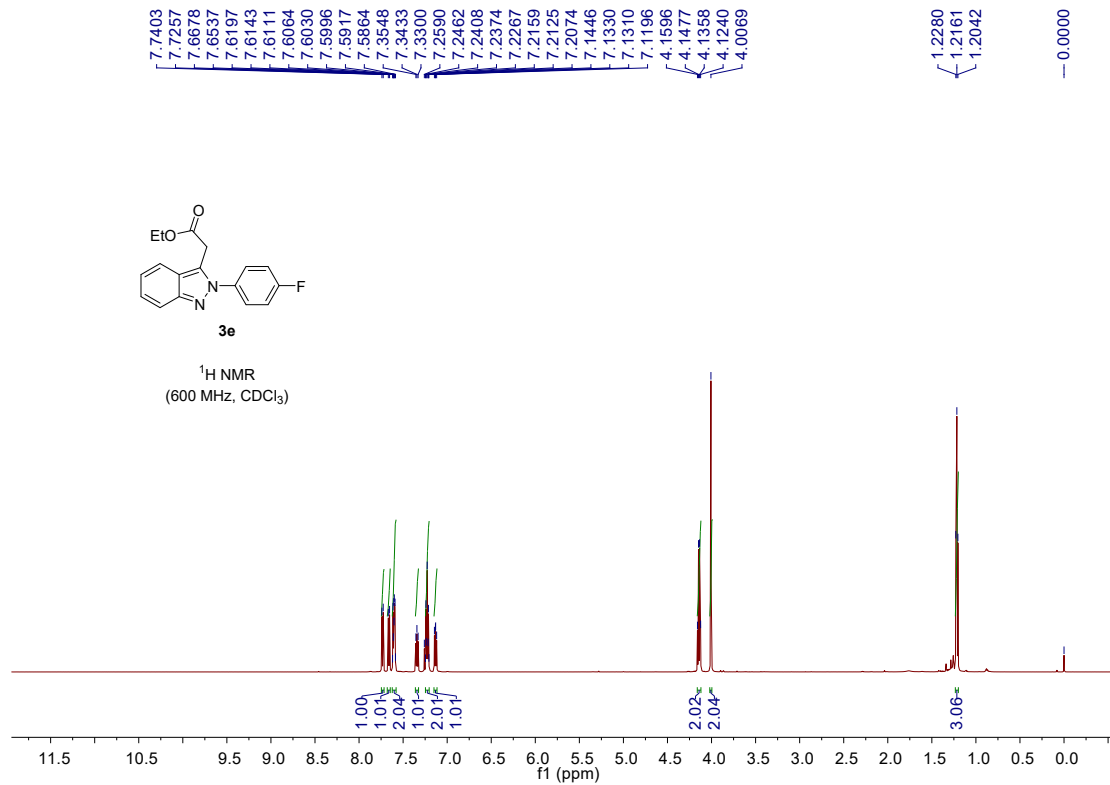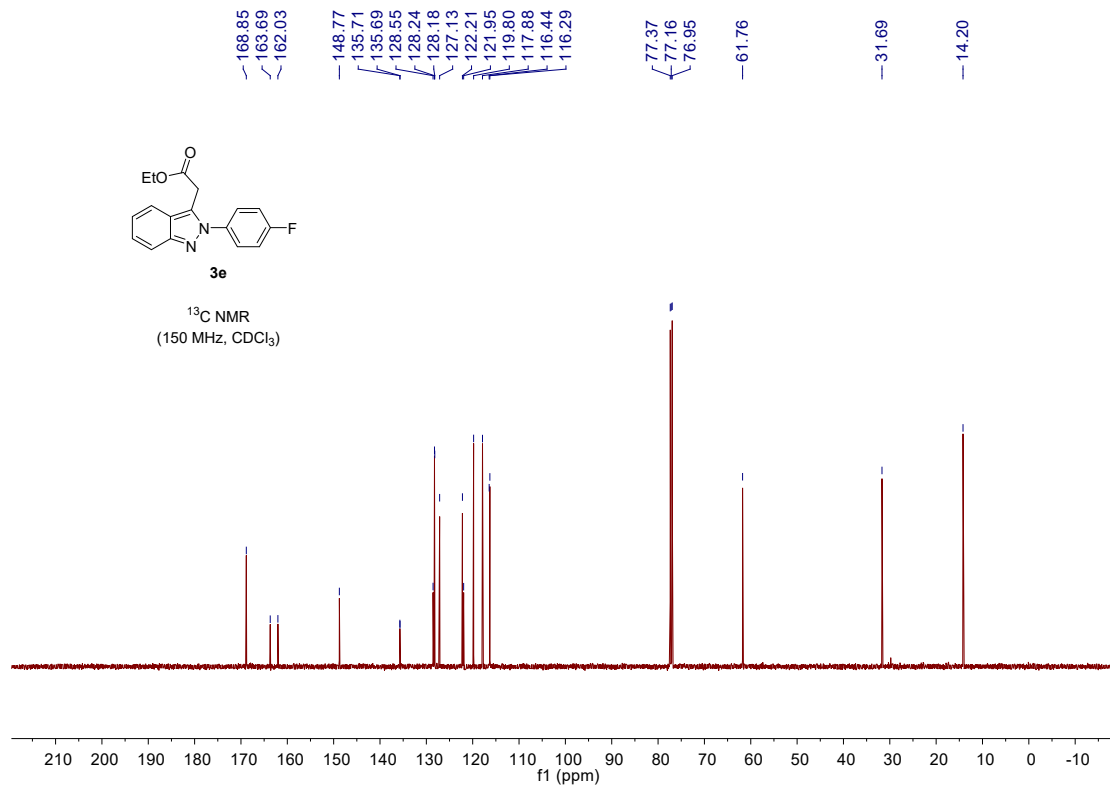

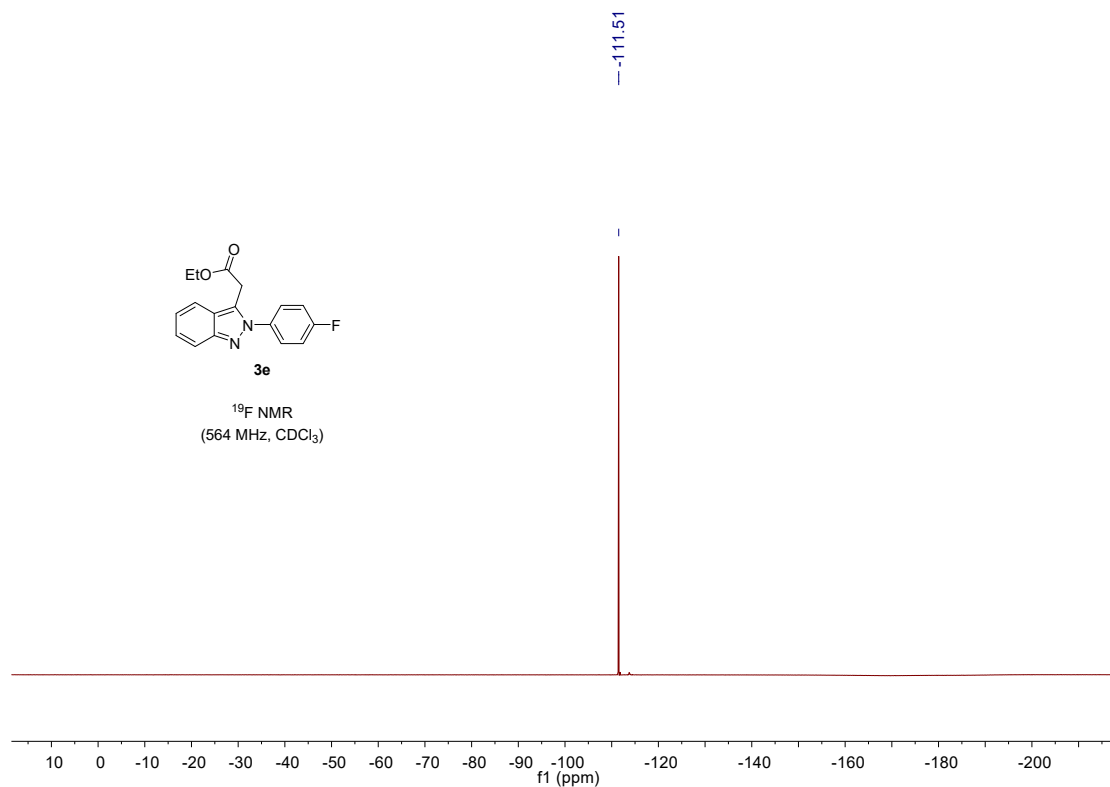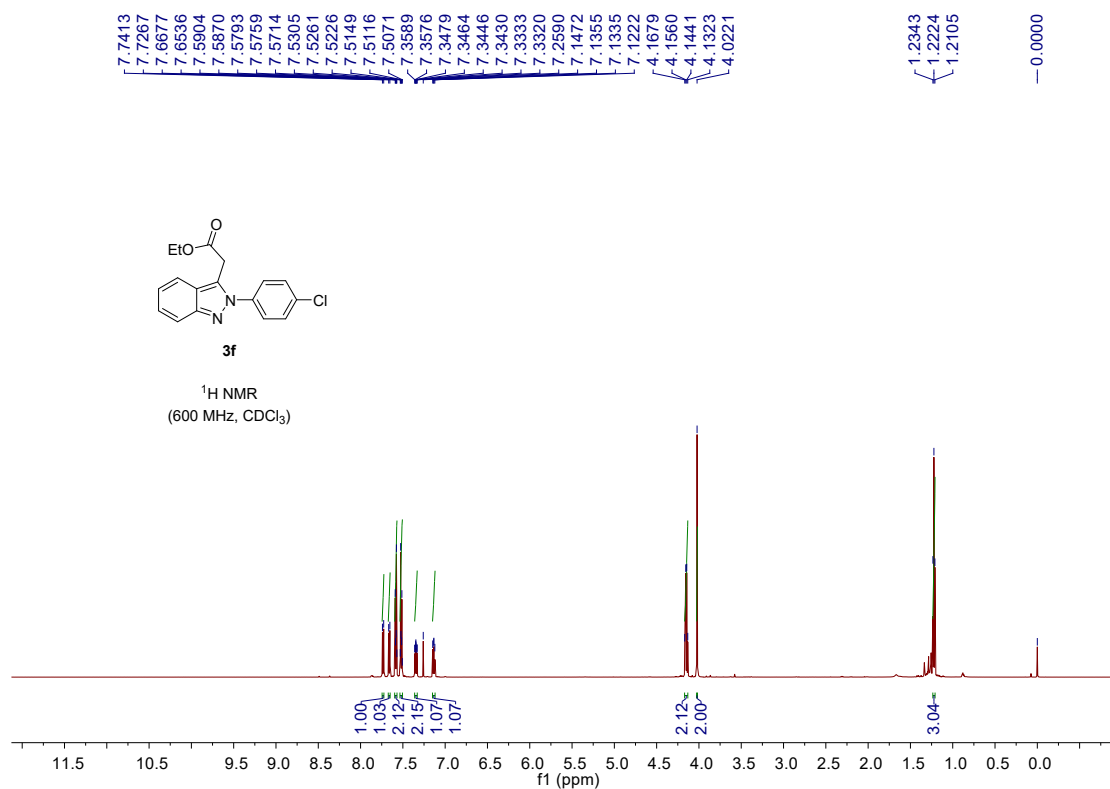

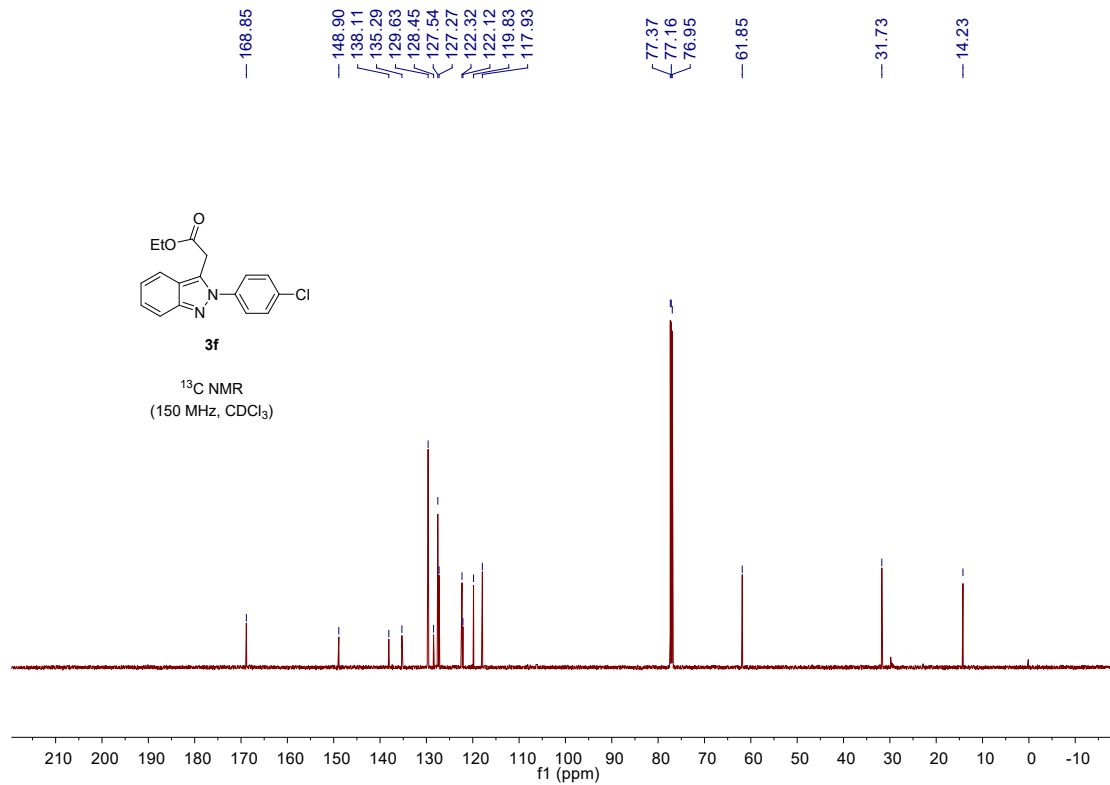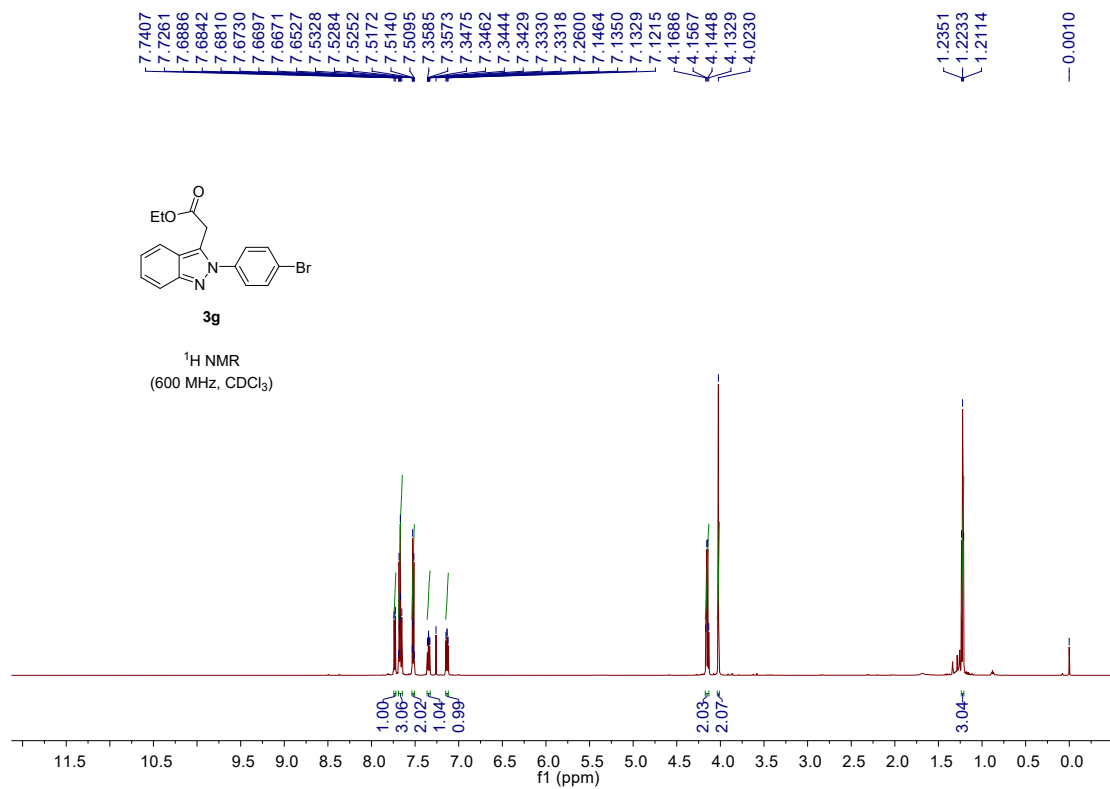



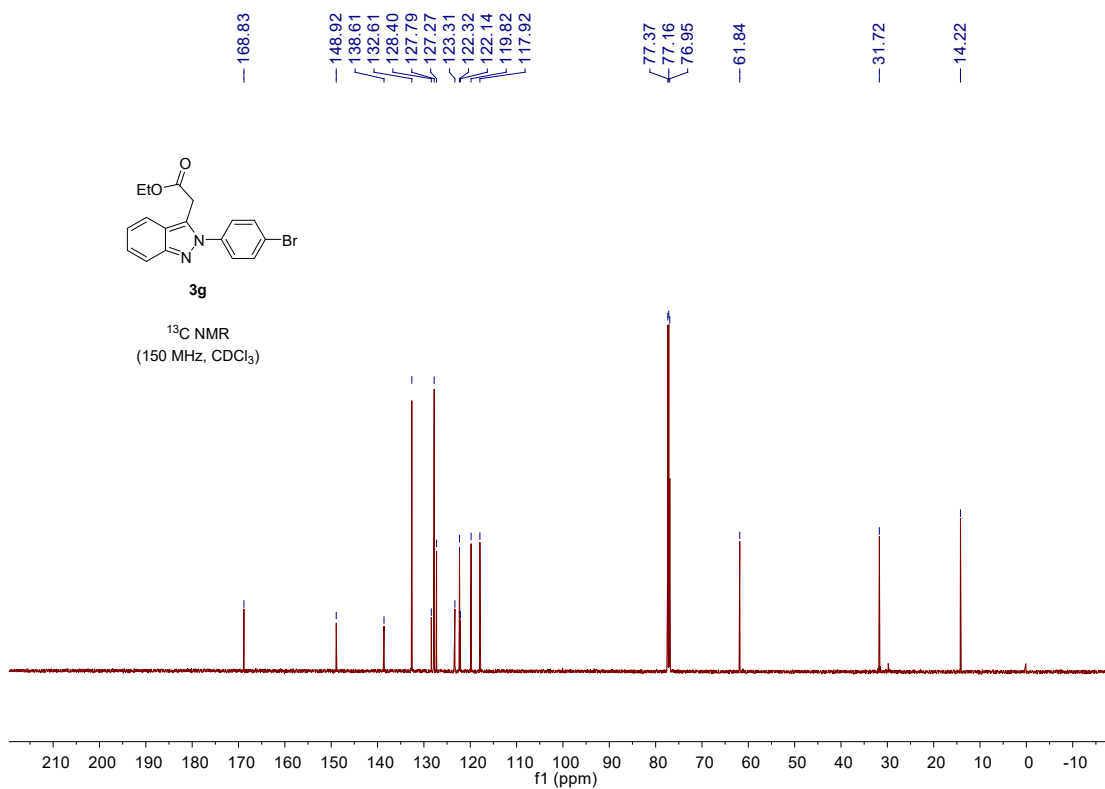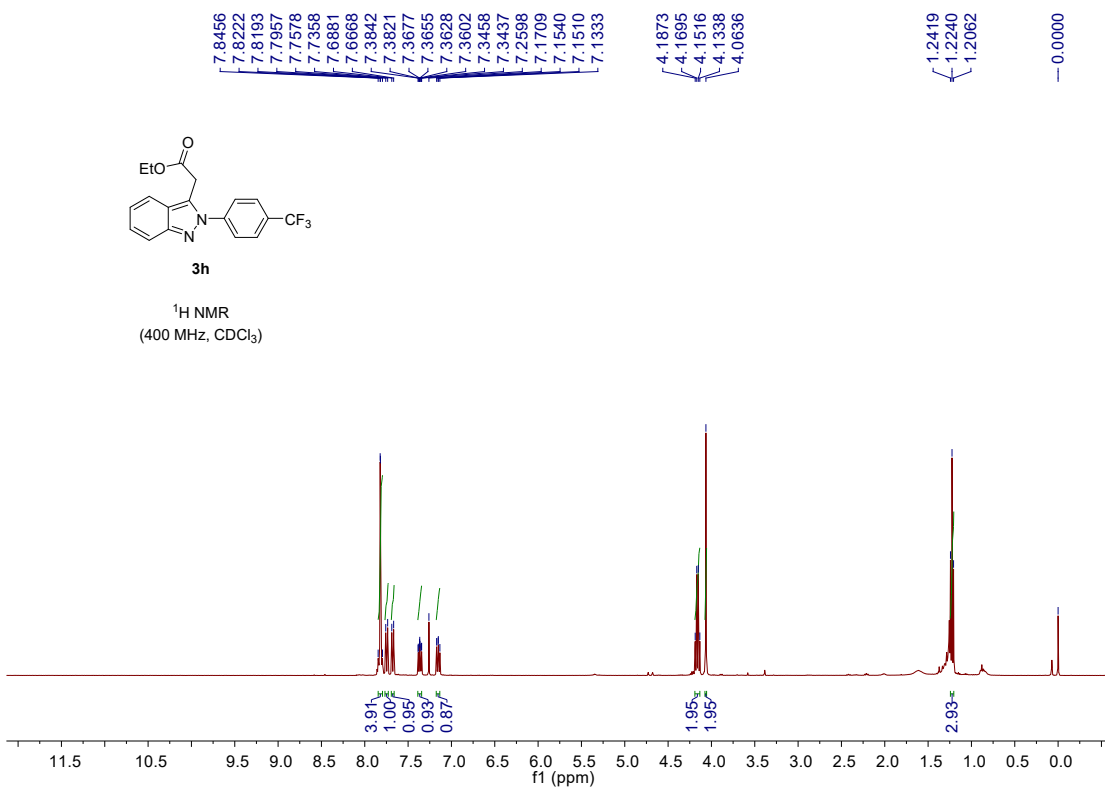

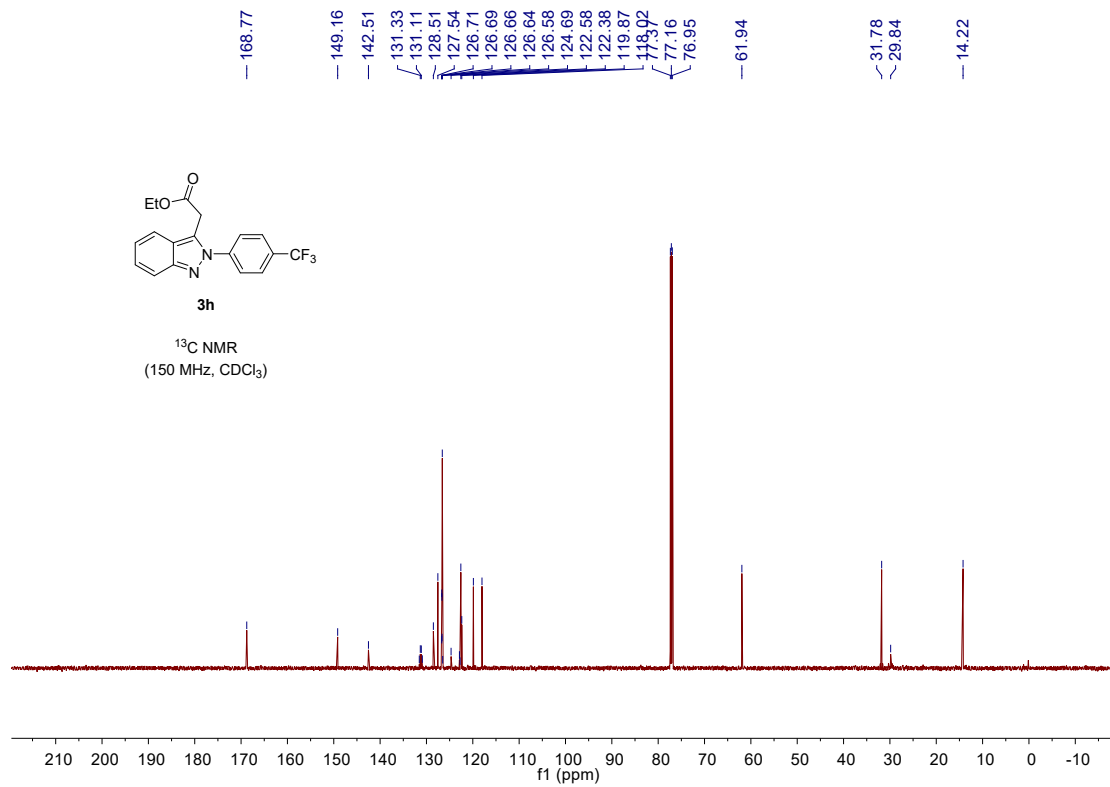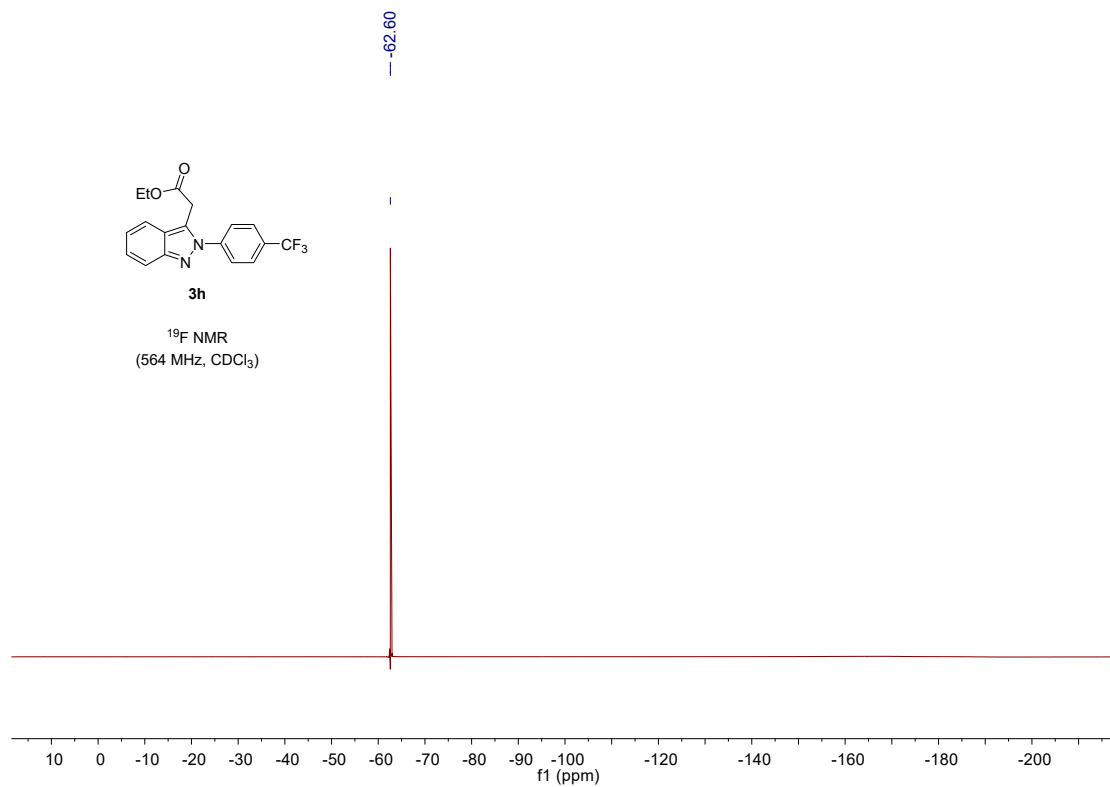

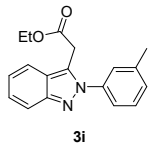

<sup>1</sup>H NMR  
(600 MHz, CDCl<sub>3</sub>)

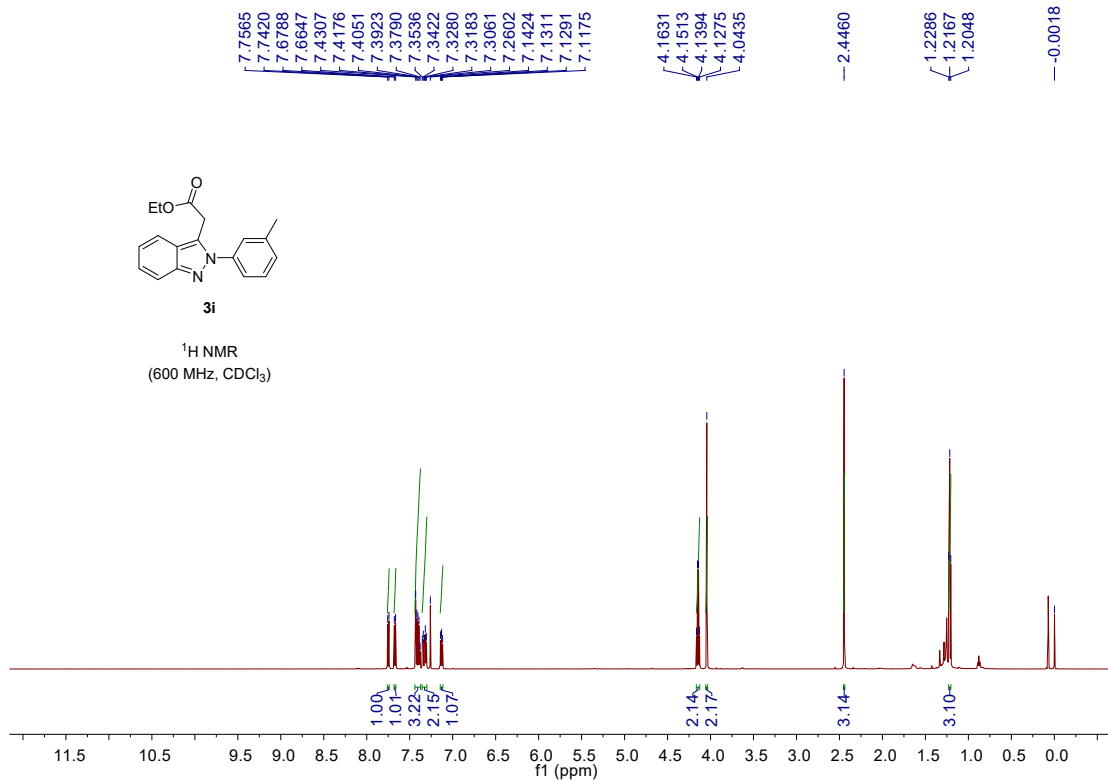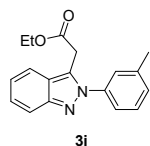

<sup>13</sup>C NMR  
(150 MHz, CDCl<sub>3</sub>)

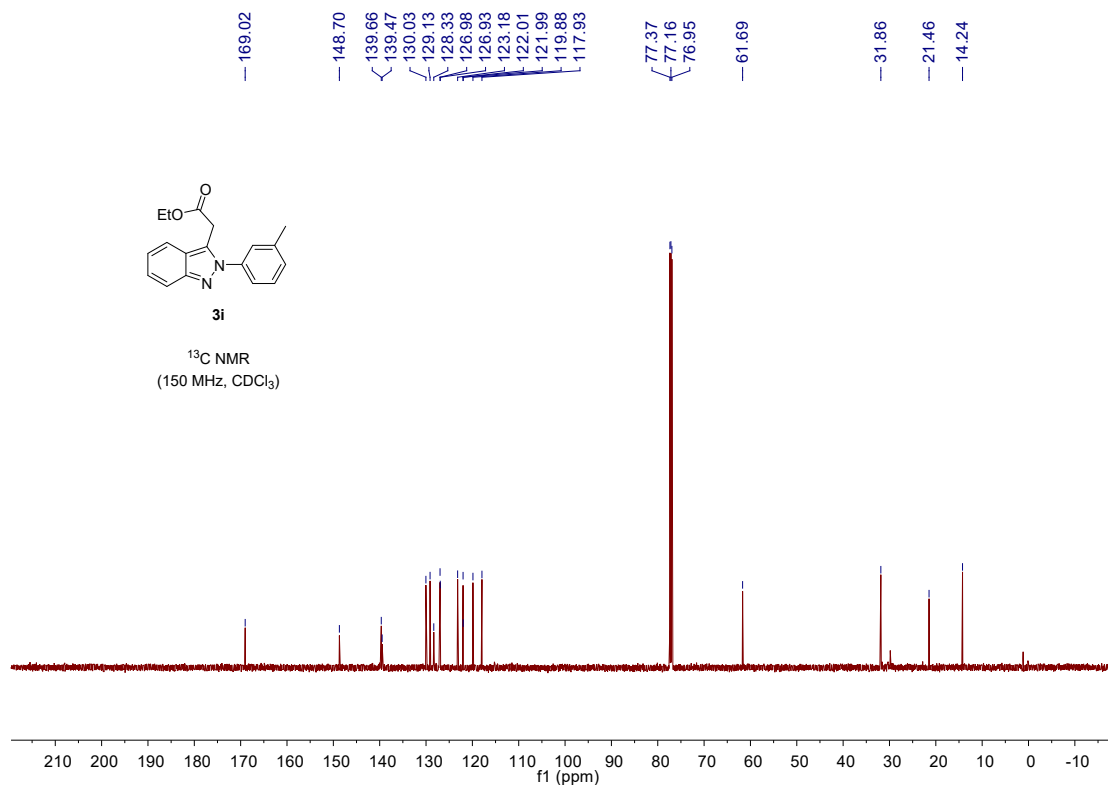

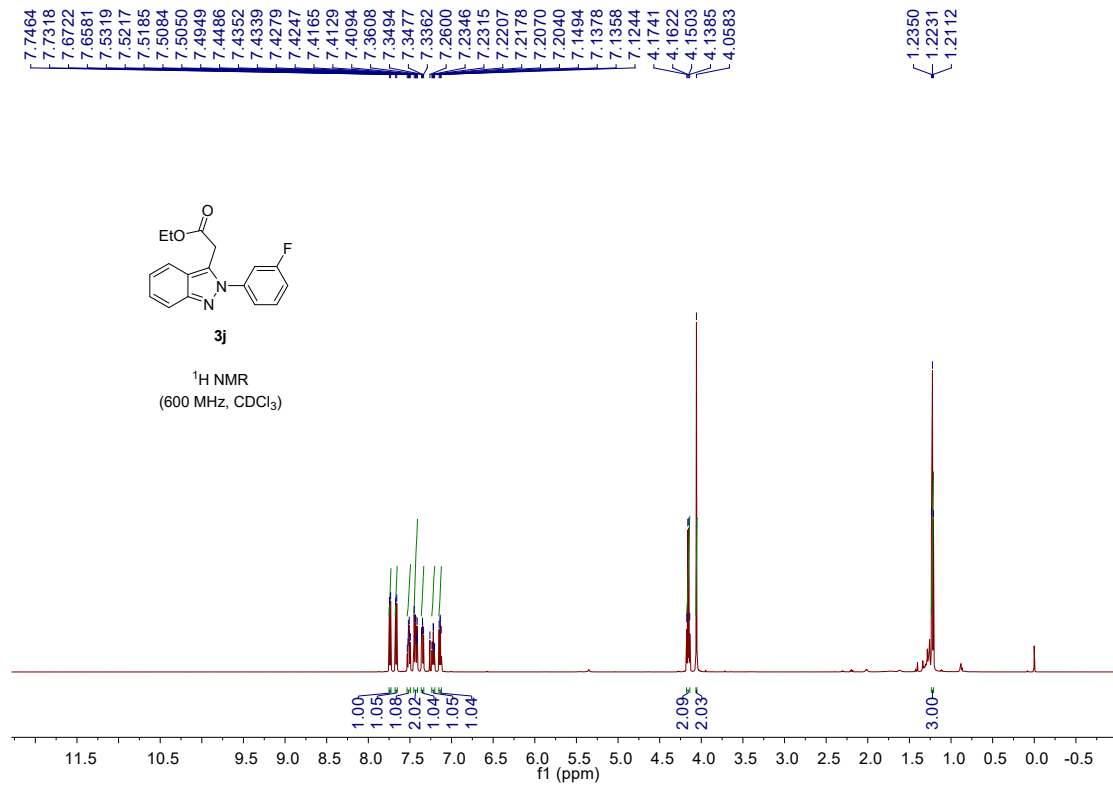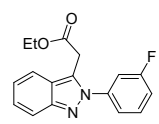

3j

<sup>1</sup>H NMR  
 (600 MHz, CDCl<sub>3</sub>)

- 168.81
- 163.60
- 161.95
- 148.91
- 140.93
- 140.86
- 130.74
- 130.68
- 127.33
- 122.38
- 122.16
- 121.92
- 121.90
- 119.85
- 117.97
- 116.41
- 114.13
- 113.96
- 77.16
- 76.95
- 61.85
- 31.75
- 14.20

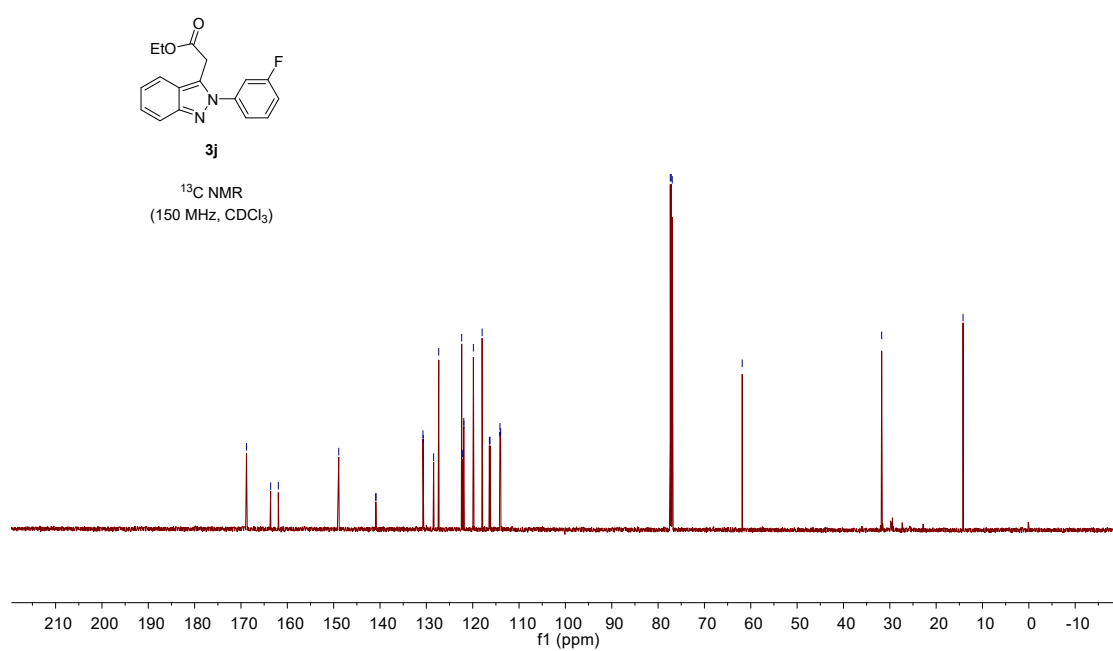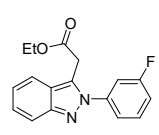

3j

<sup>13</sup>C NMR  
 (150 MHz, CDCl<sub>3</sub>)

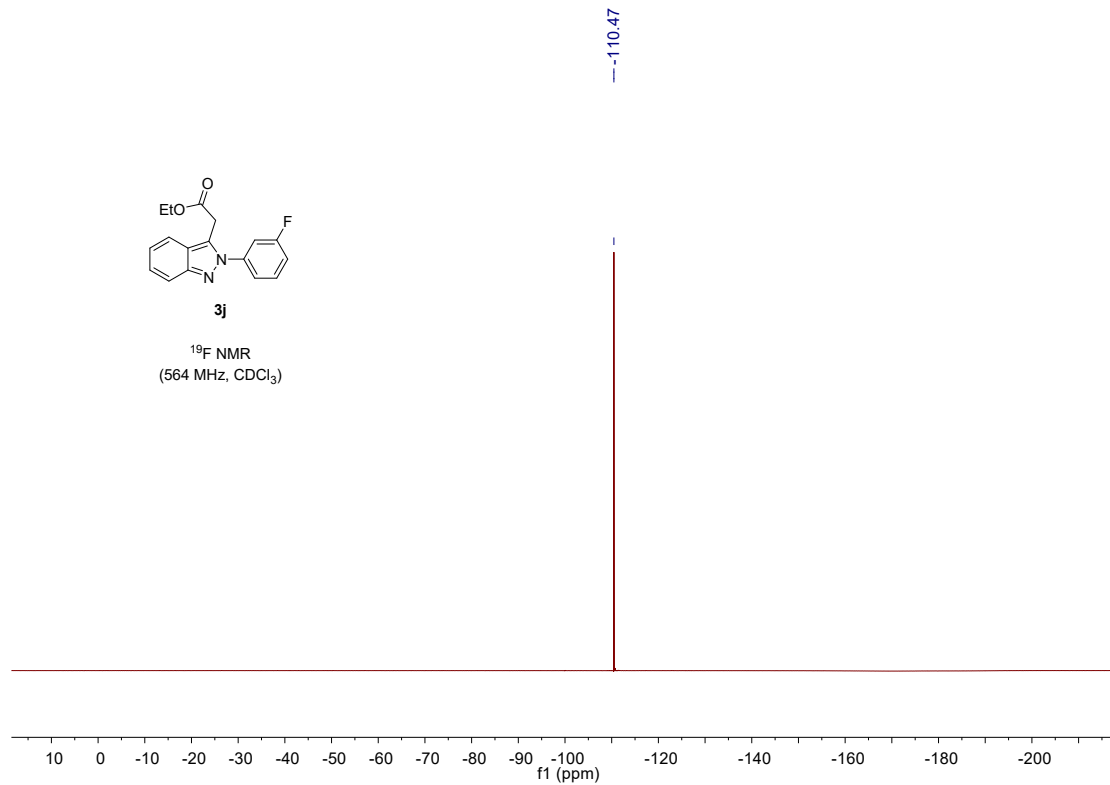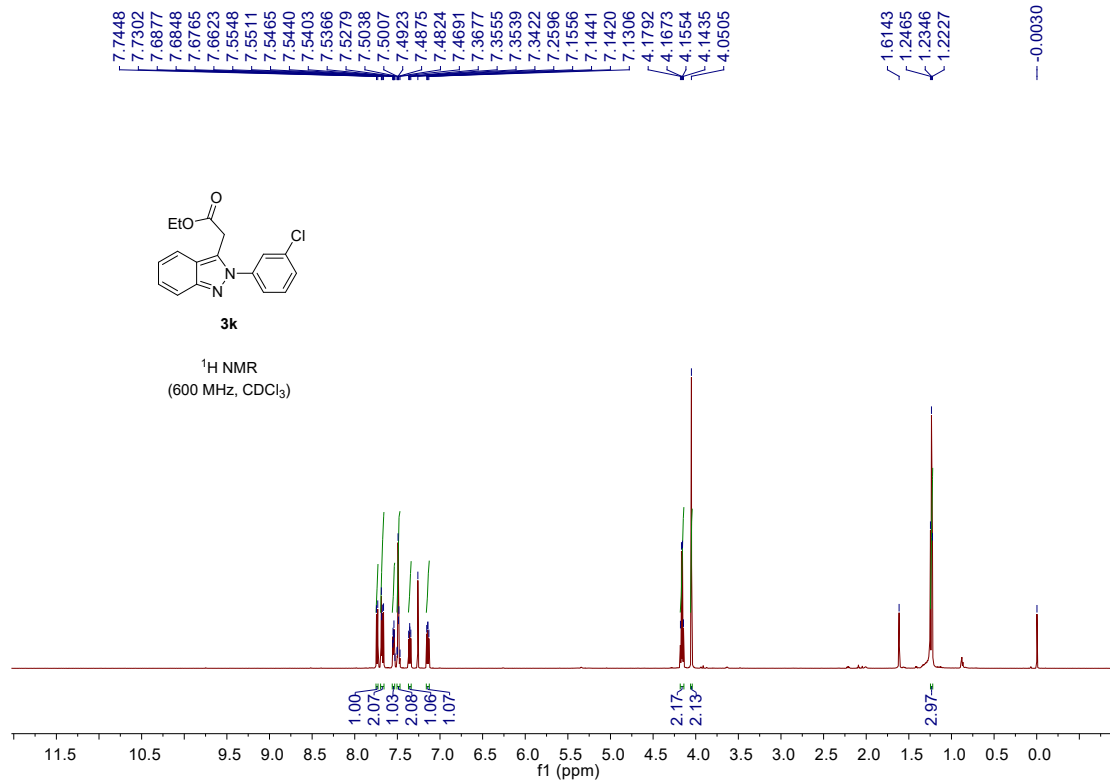

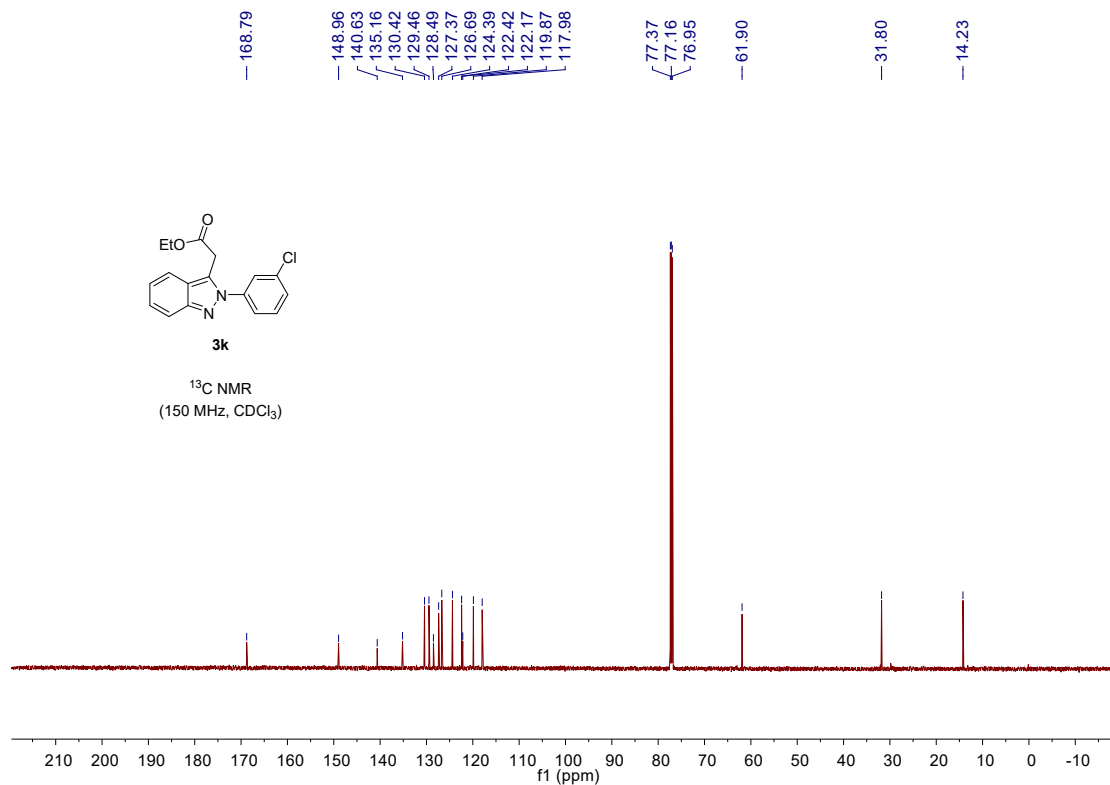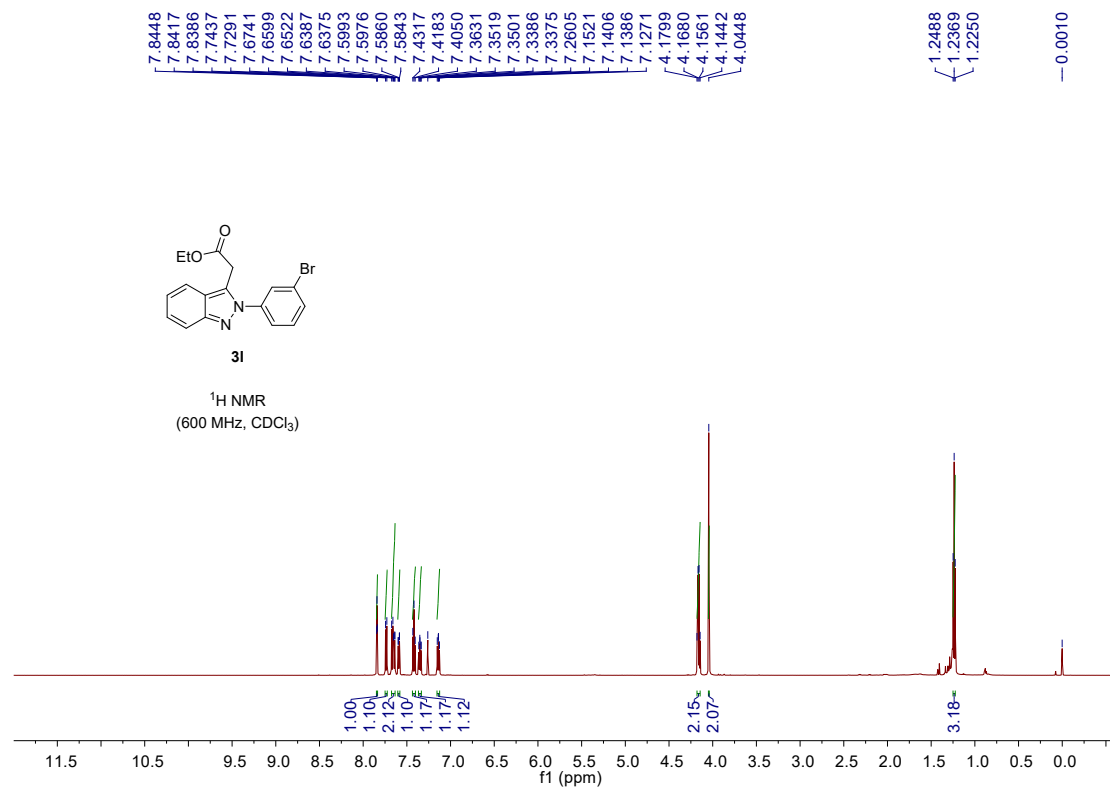

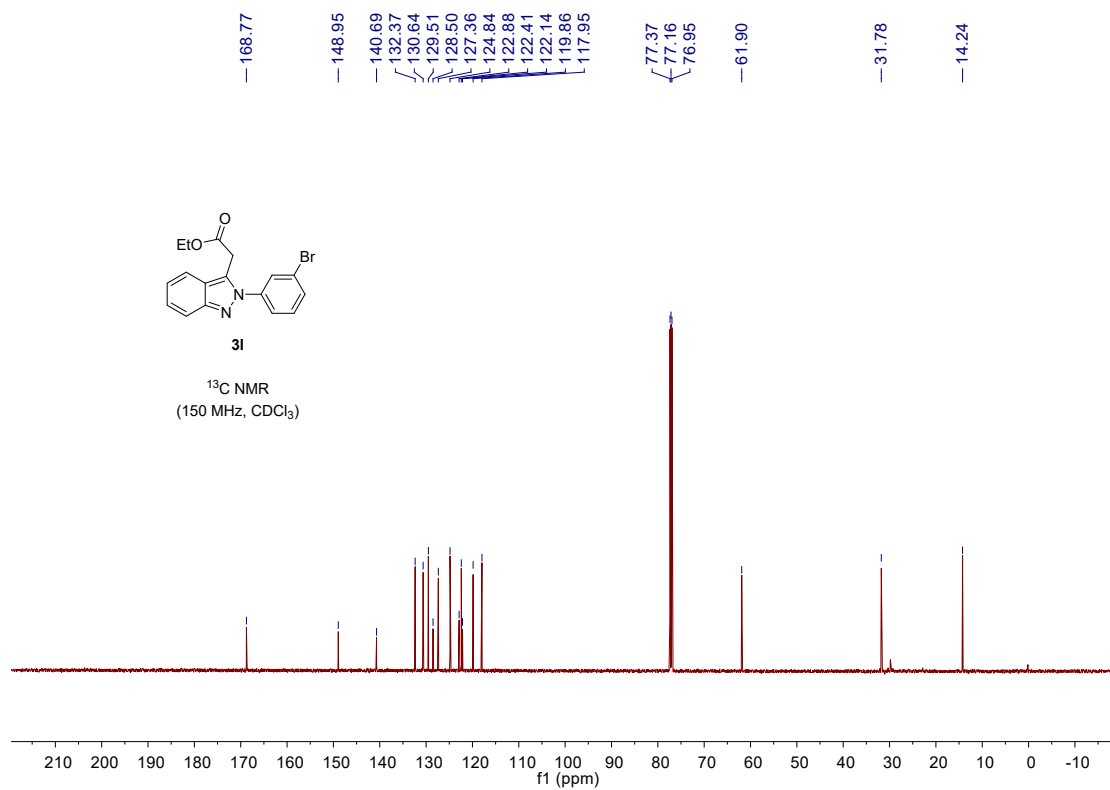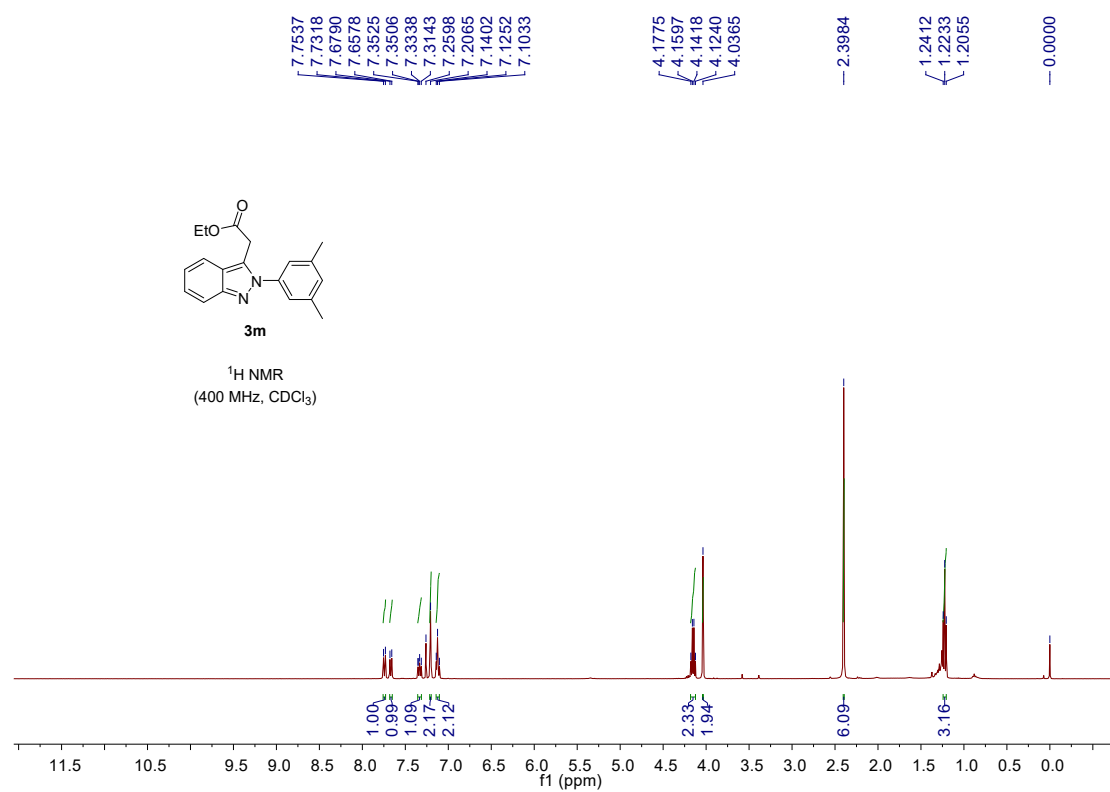

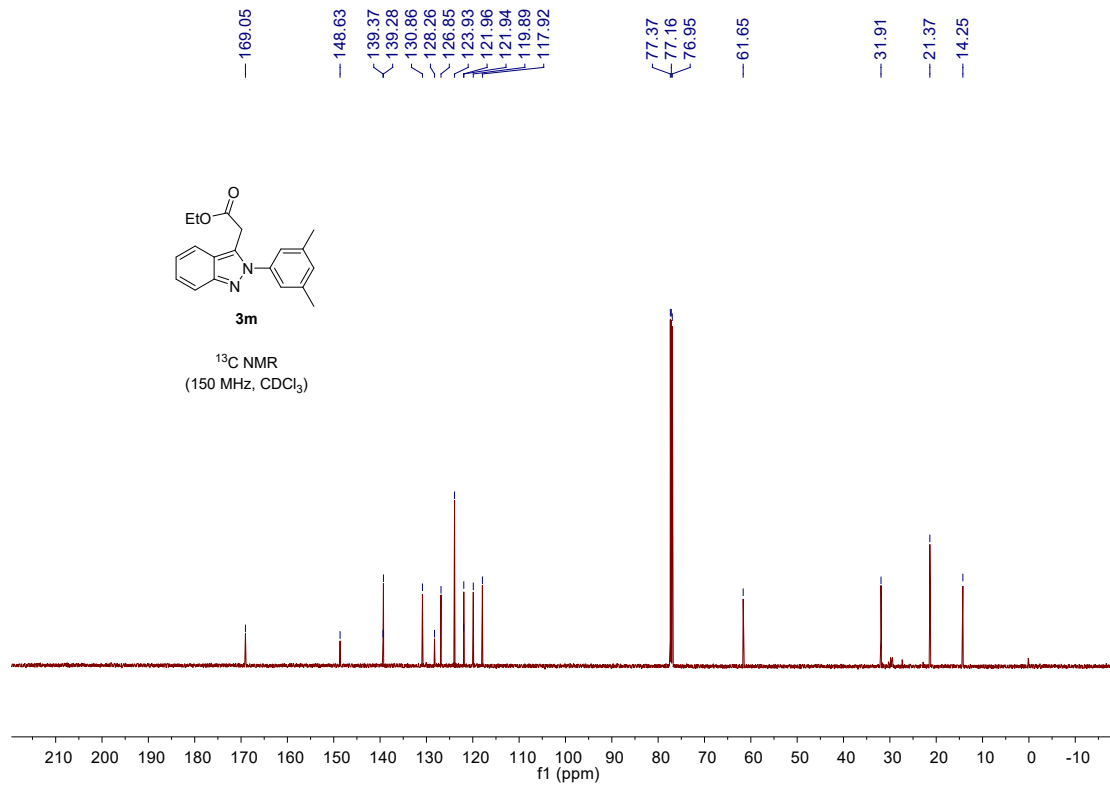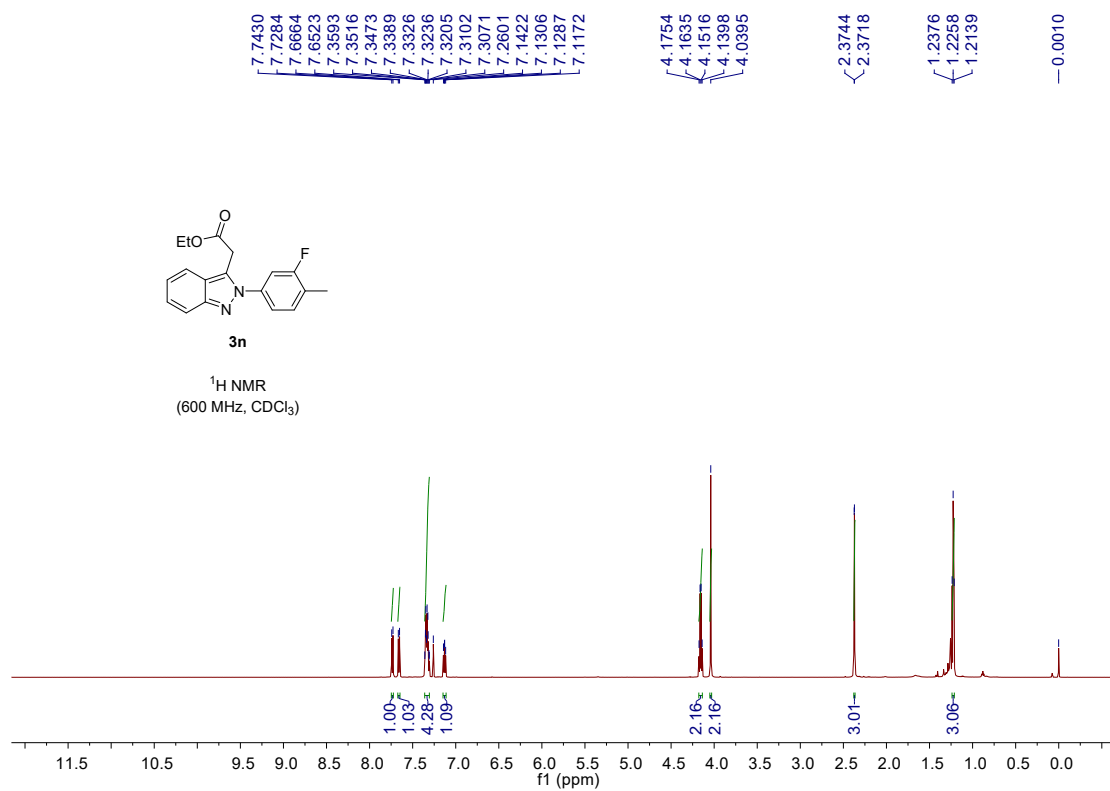



168.88  
 161.85  
 160.21  
 148.78  
 138.42  
 131.95  
 131.91  
 128.39  
 127.17  
 126.42  
 126.31  
 122.24  
 122.05  
 121.60  
 121.57  
 119.84  
 117.94  
 113.61  
 113.45  
 77.16  
 76.95  
 61.81  
 31.77  
 14.62  
 14.59  
 14.21

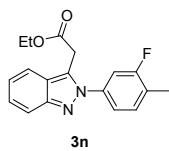

<sup>13</sup>C NMR  
(150 MHz, CDCl<sub>3</sub>)

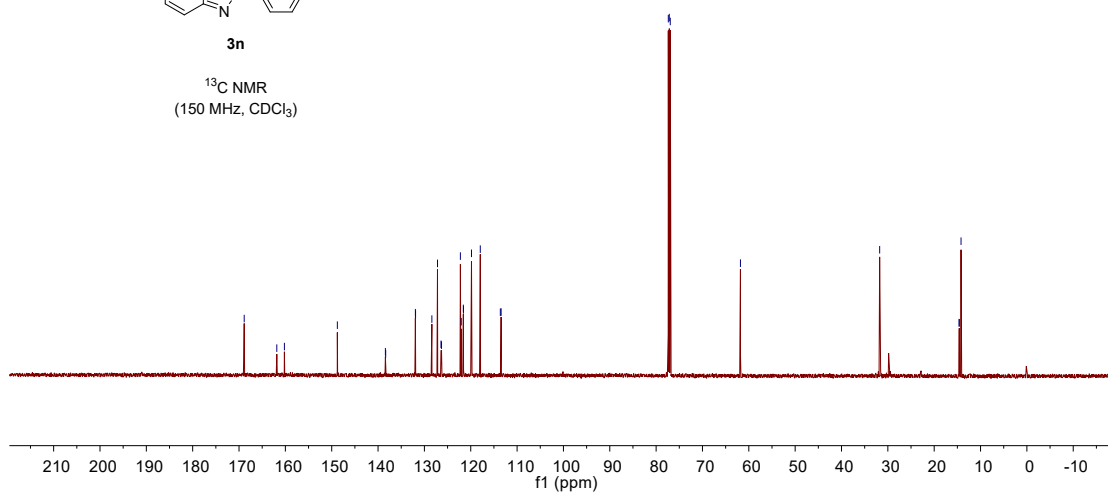

-114.42

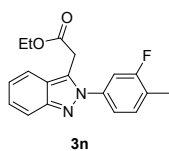

<sup>19</sup>F NMR  
(564 MHz, CDCl<sub>3</sub>)

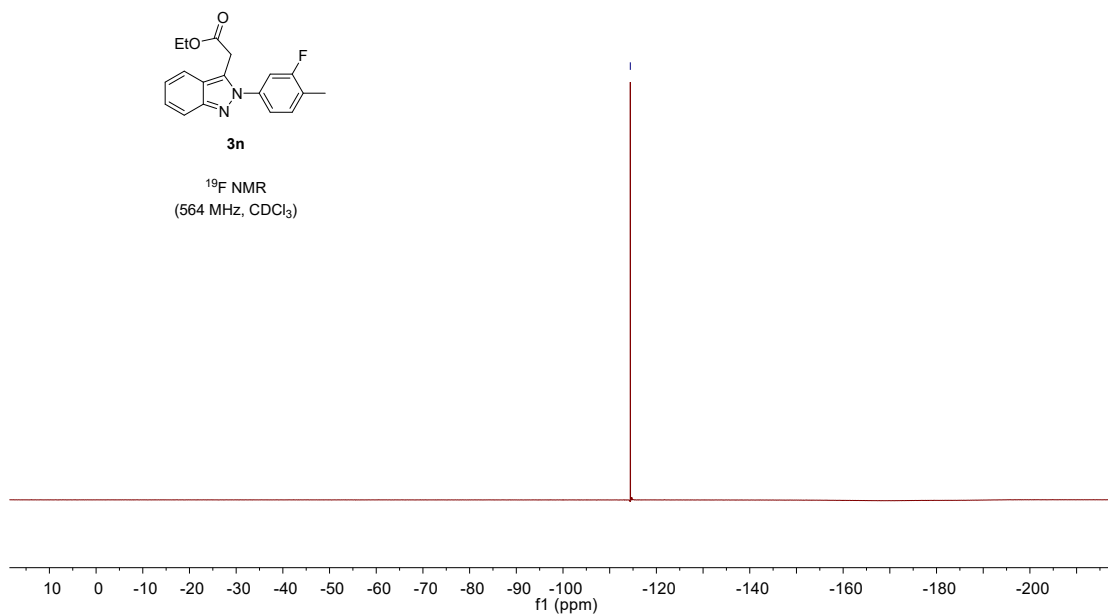

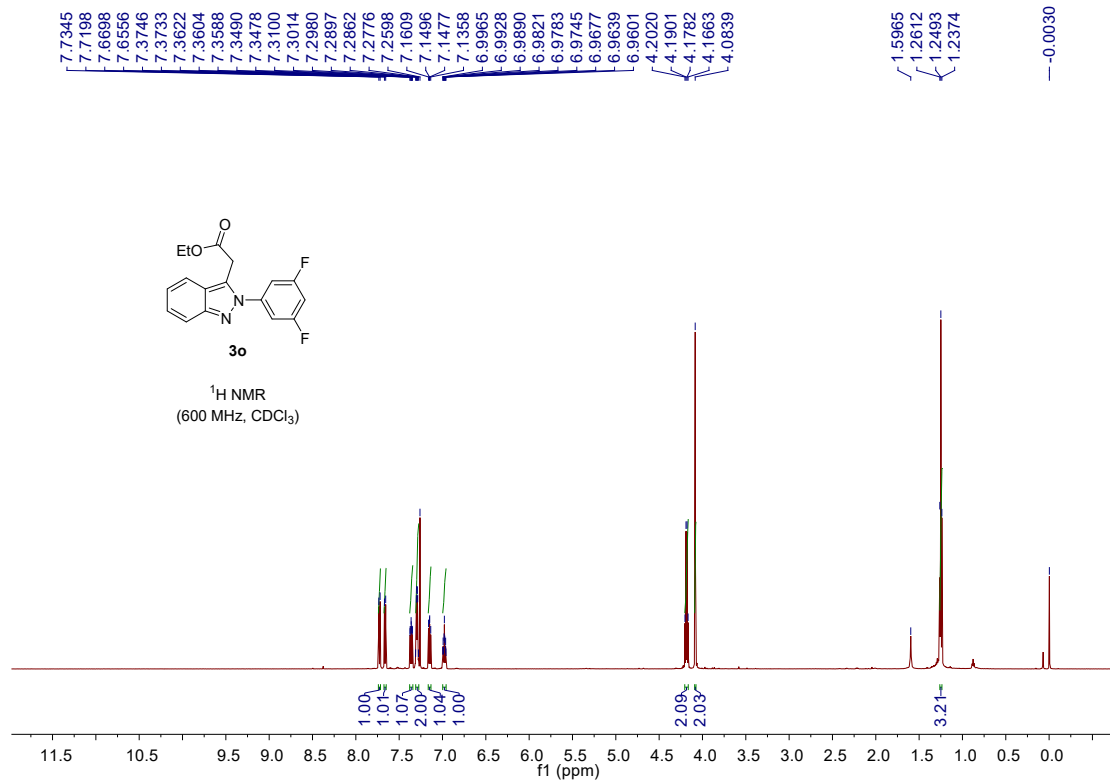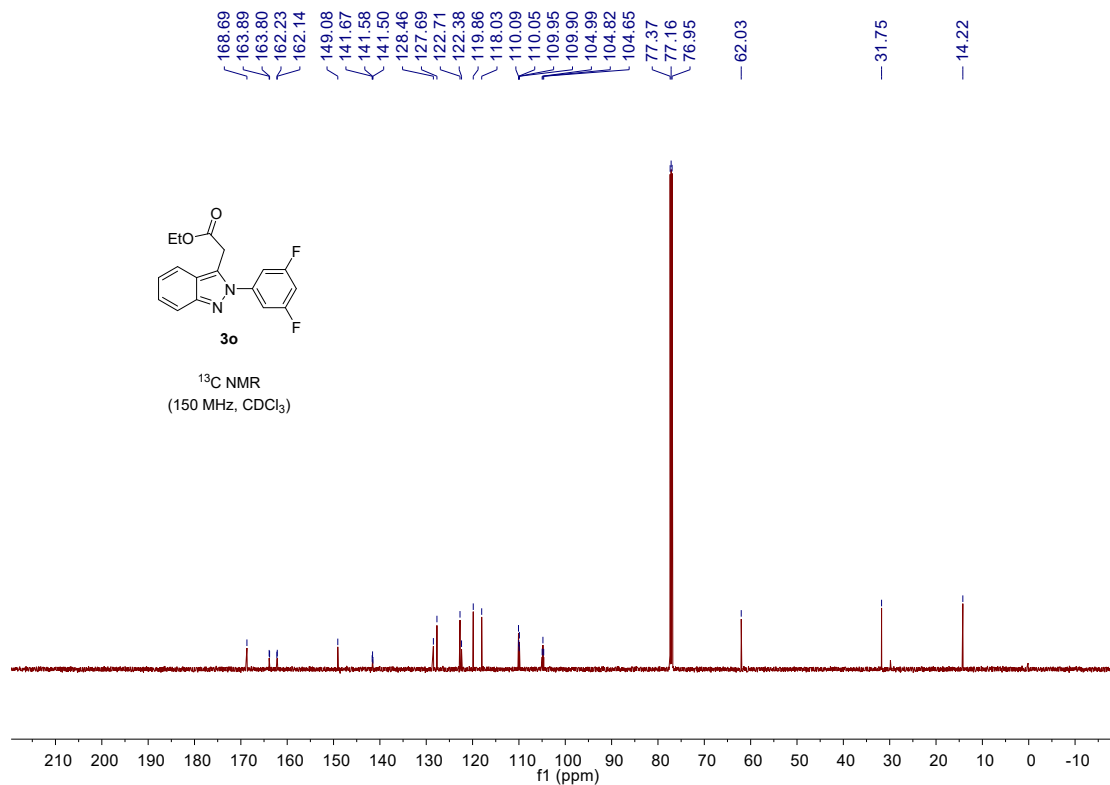

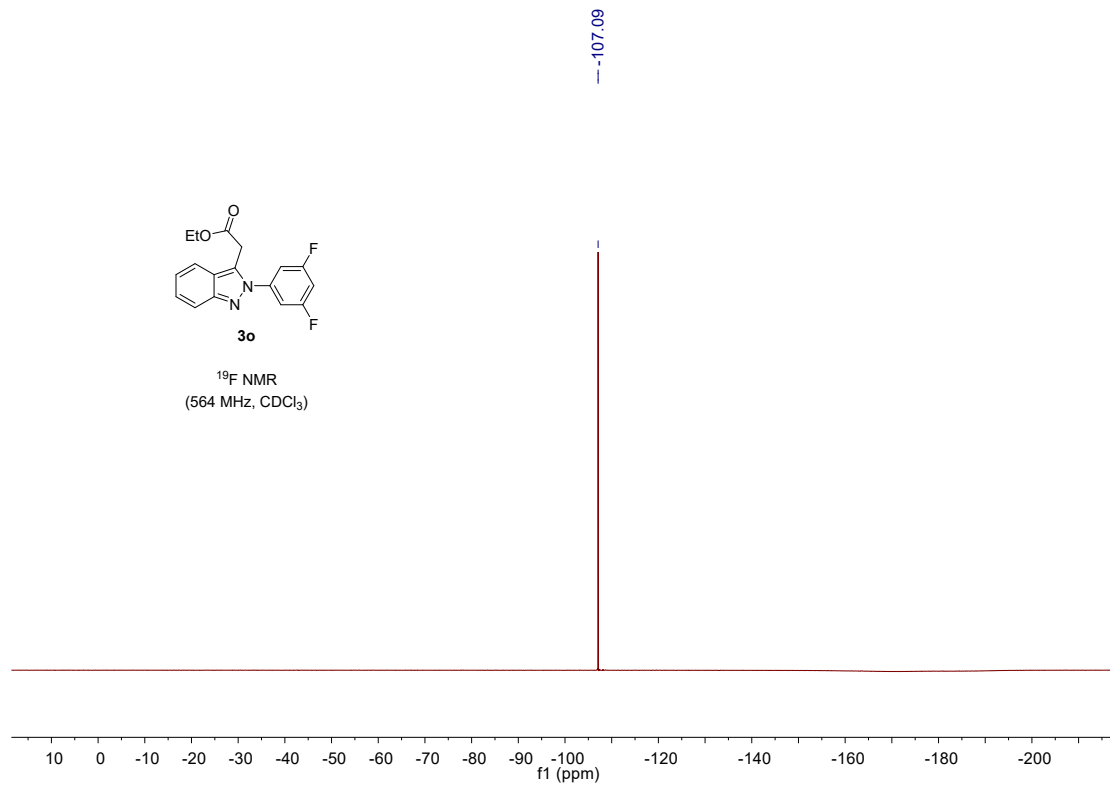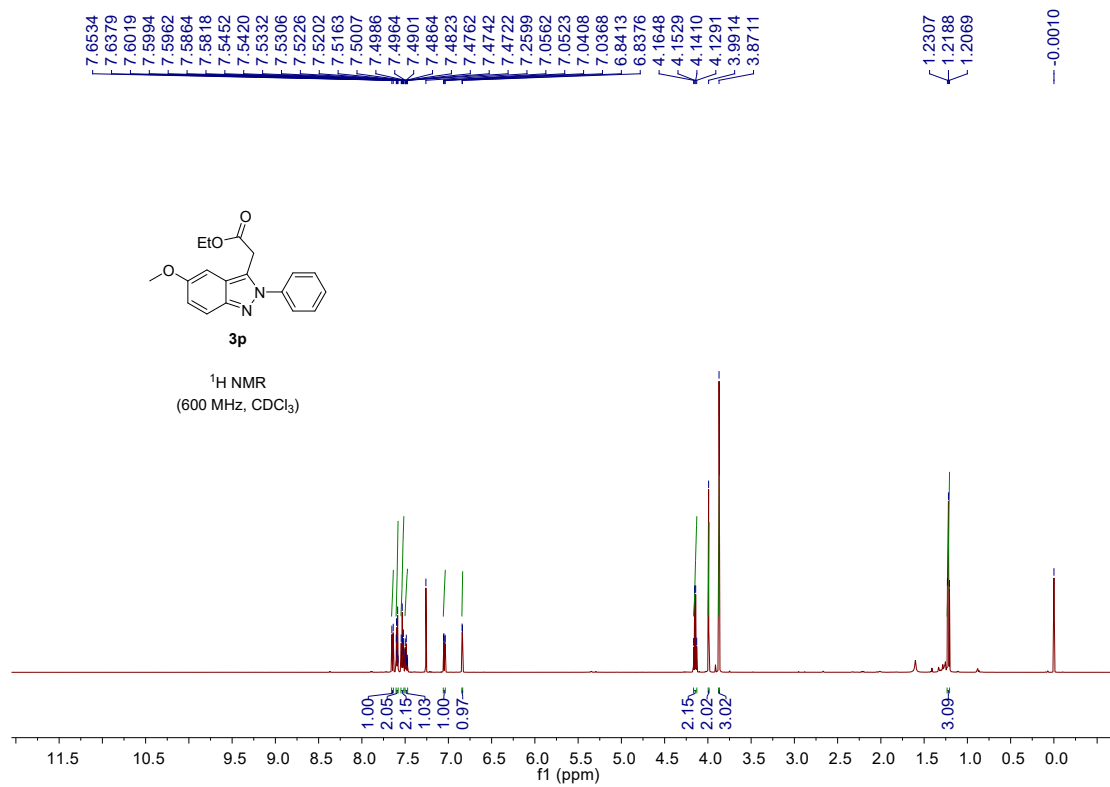

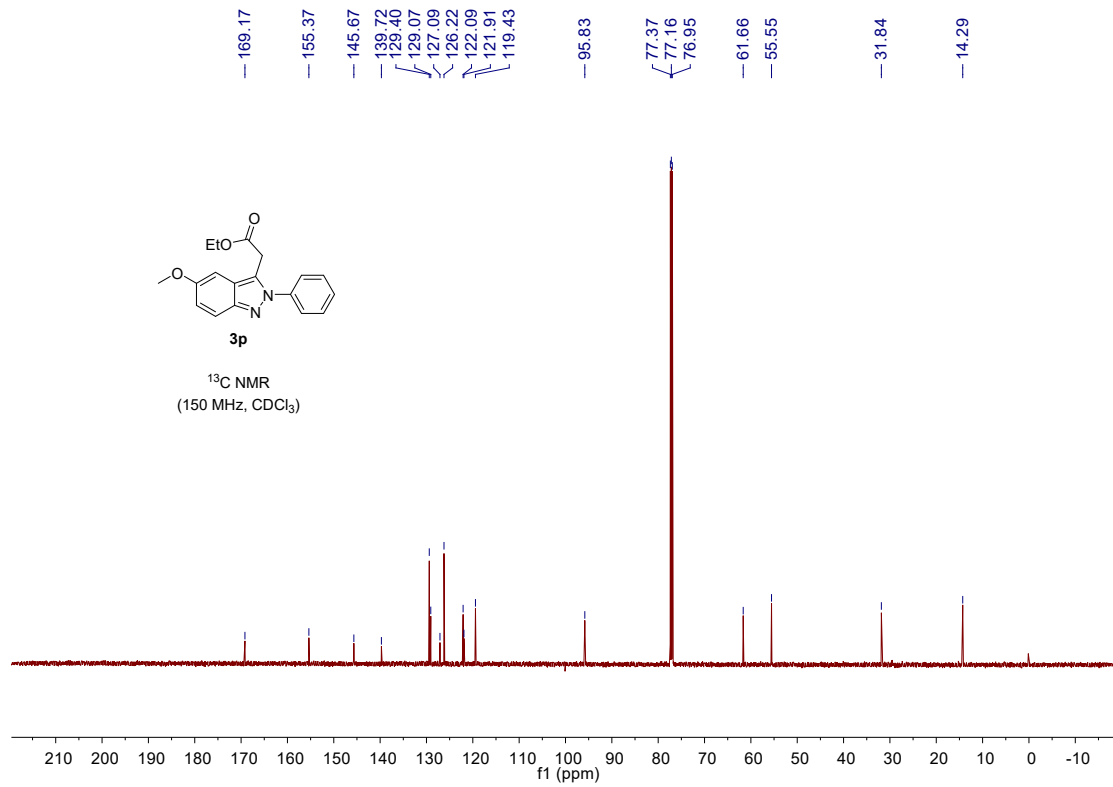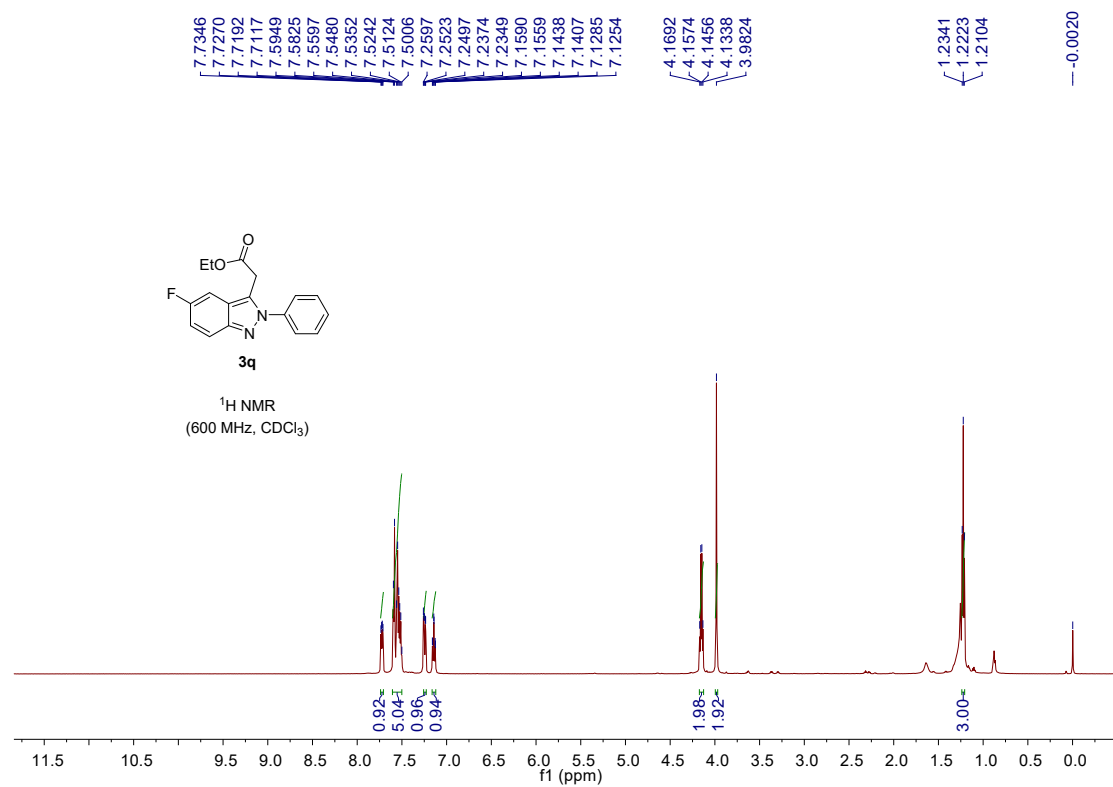

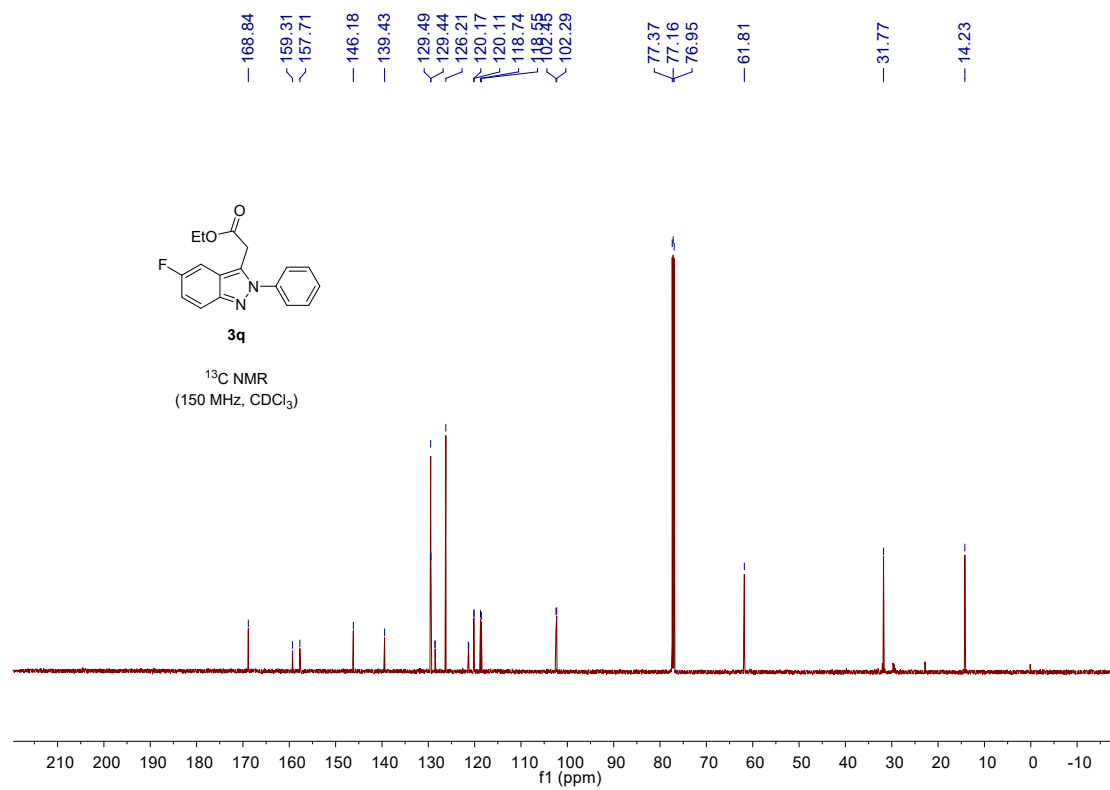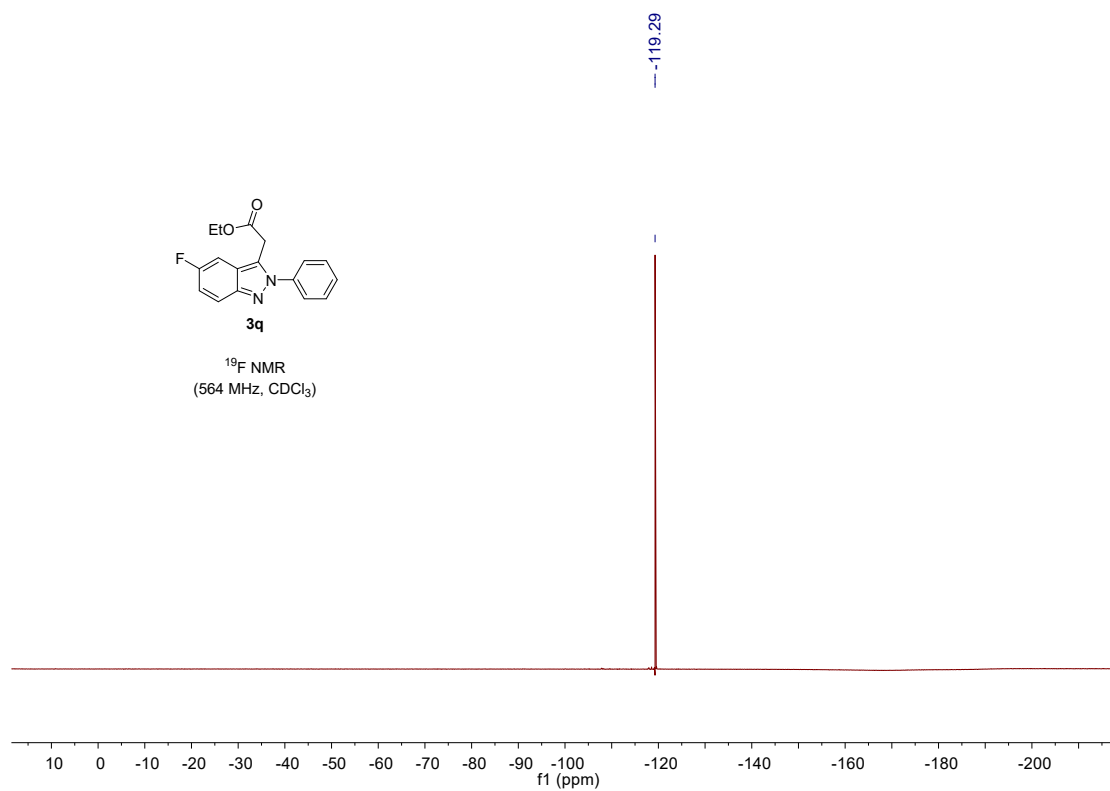

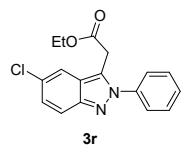

<sup>1</sup>H NMR  
(600 MHz, CDCl<sub>3</sub>)

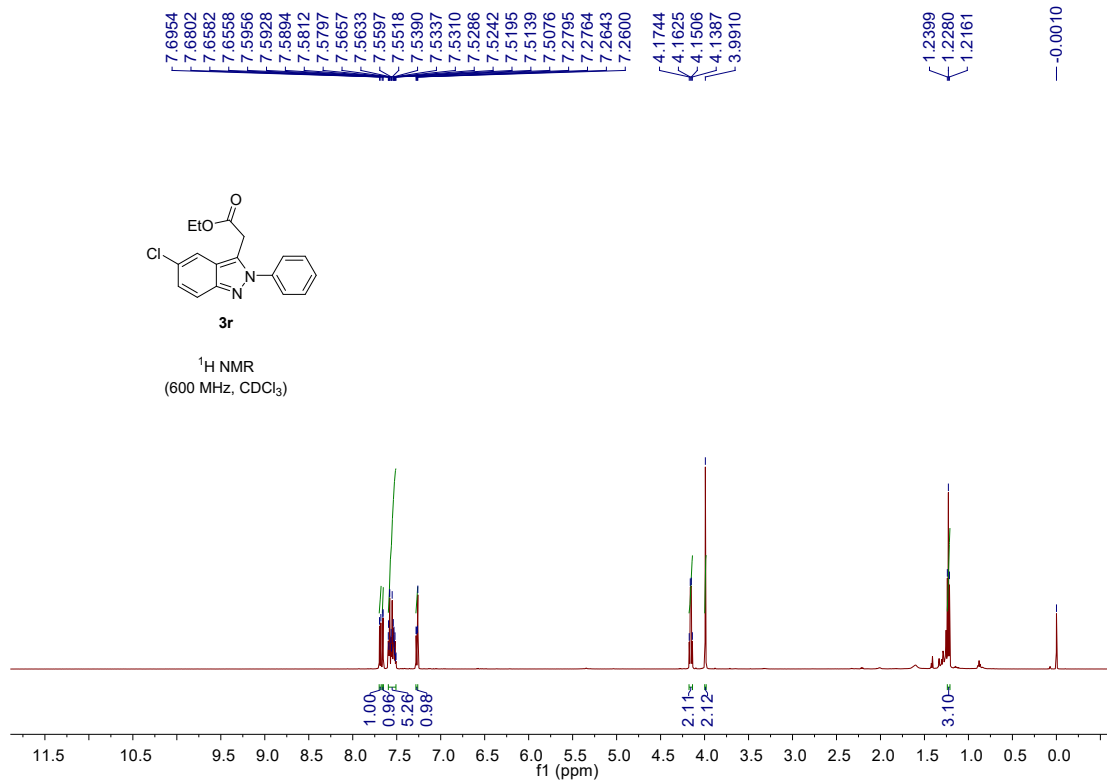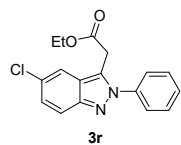

<sup>13</sup>C NMR  
(150 MHz, CDCl<sub>3</sub>)

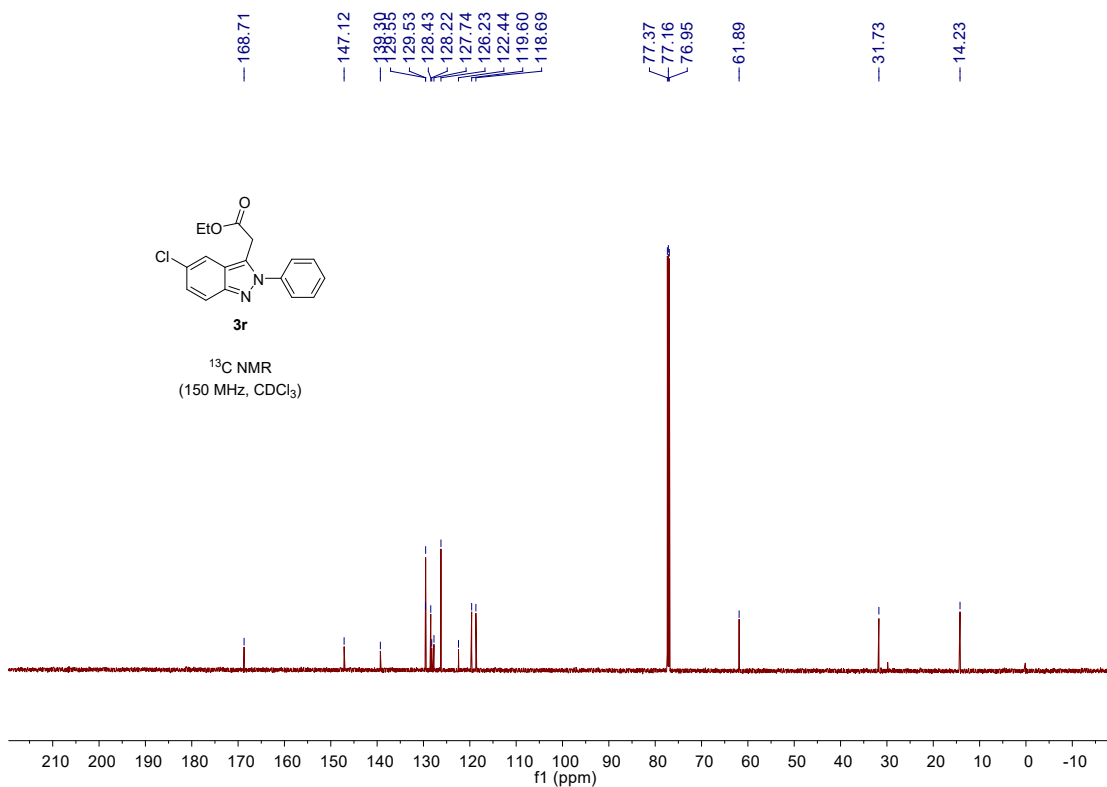

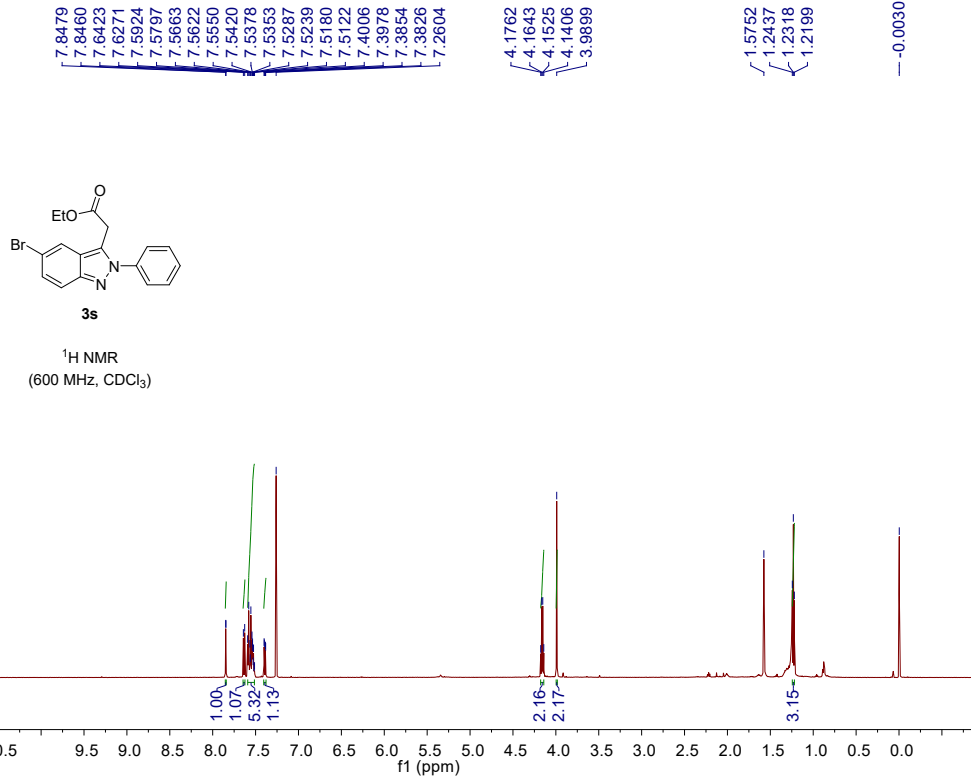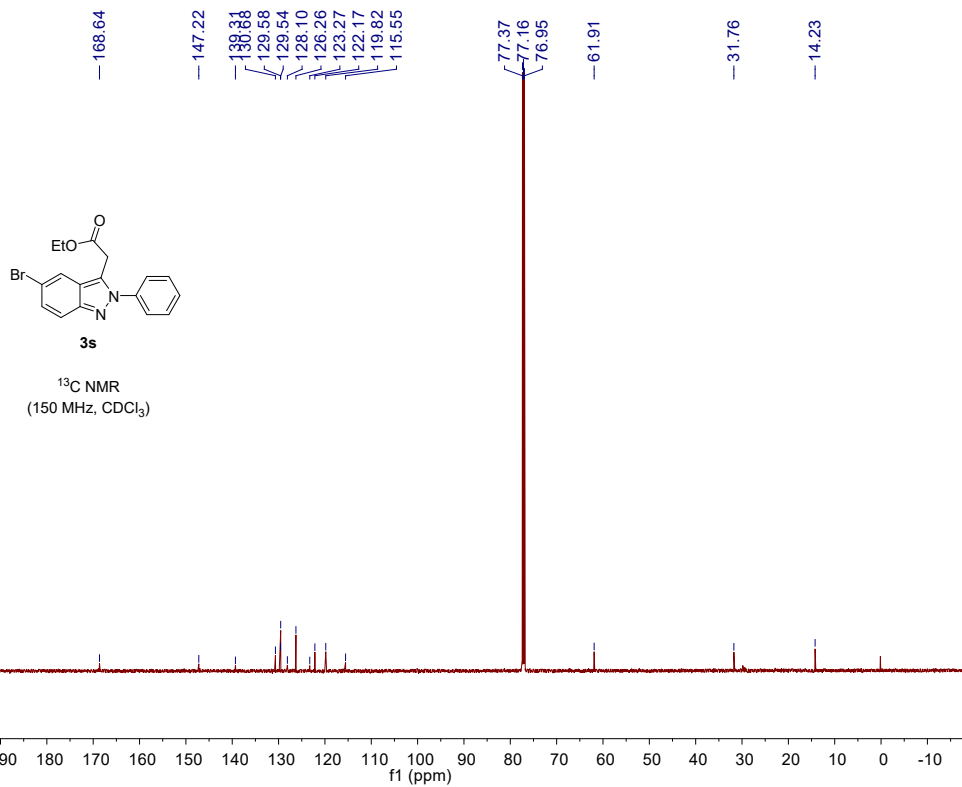

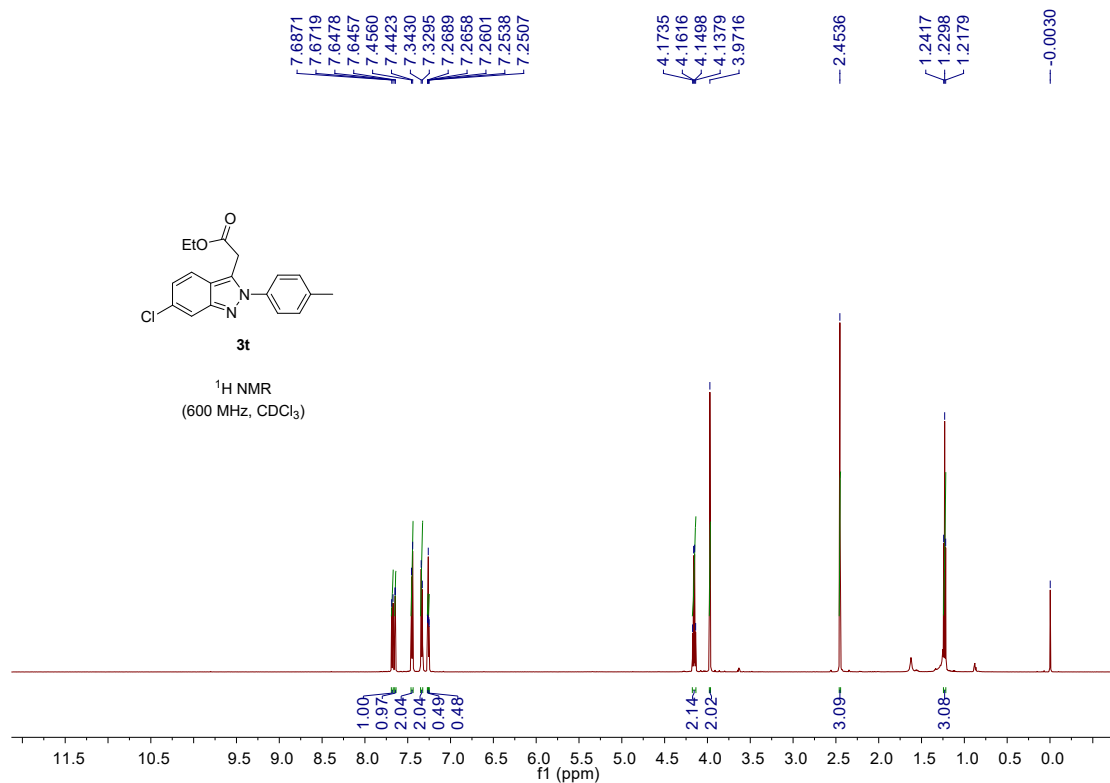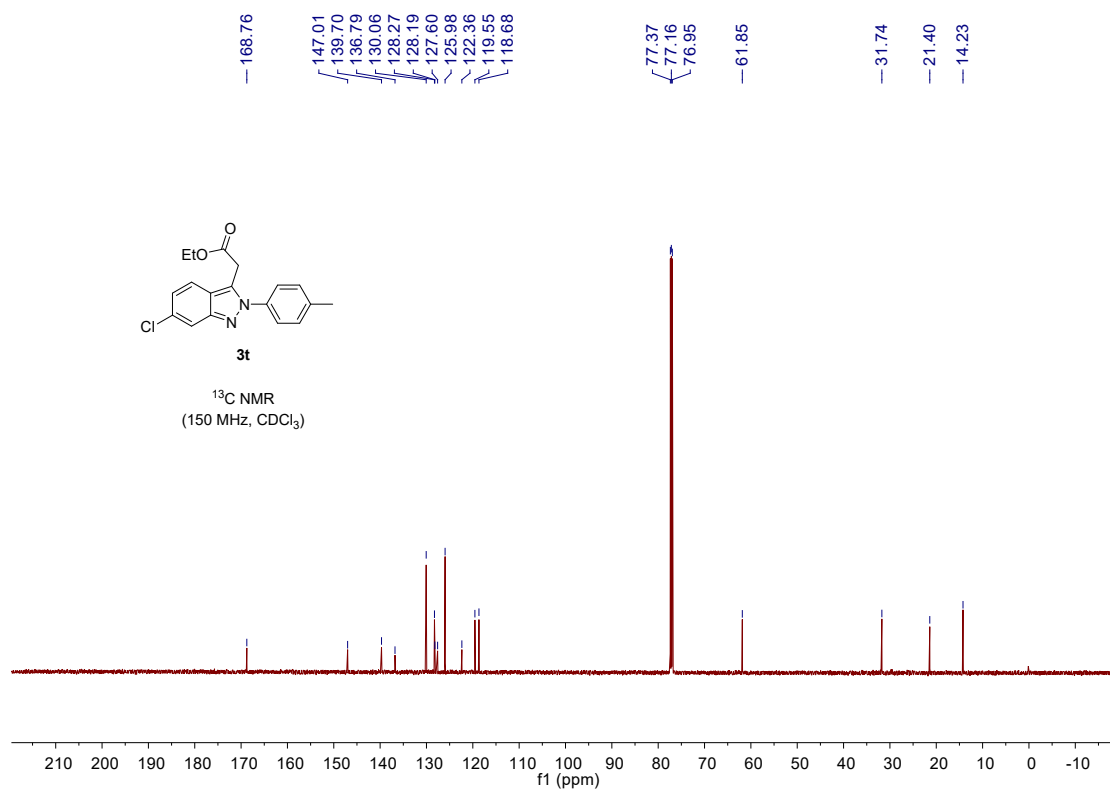



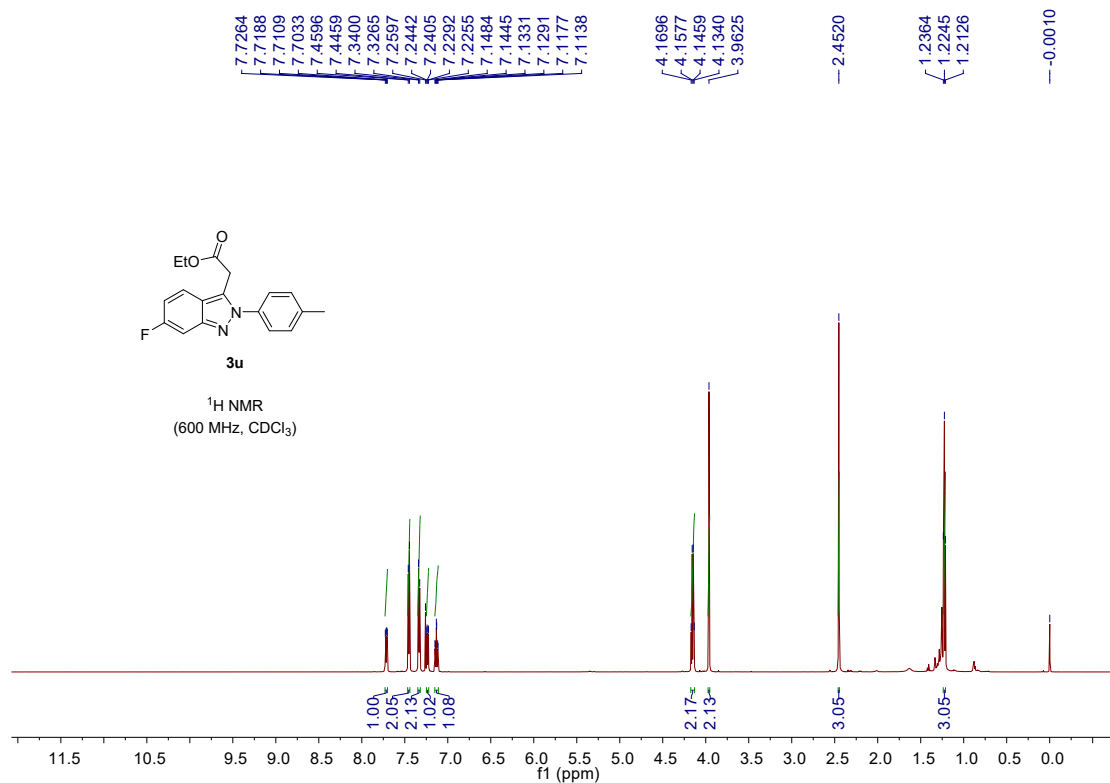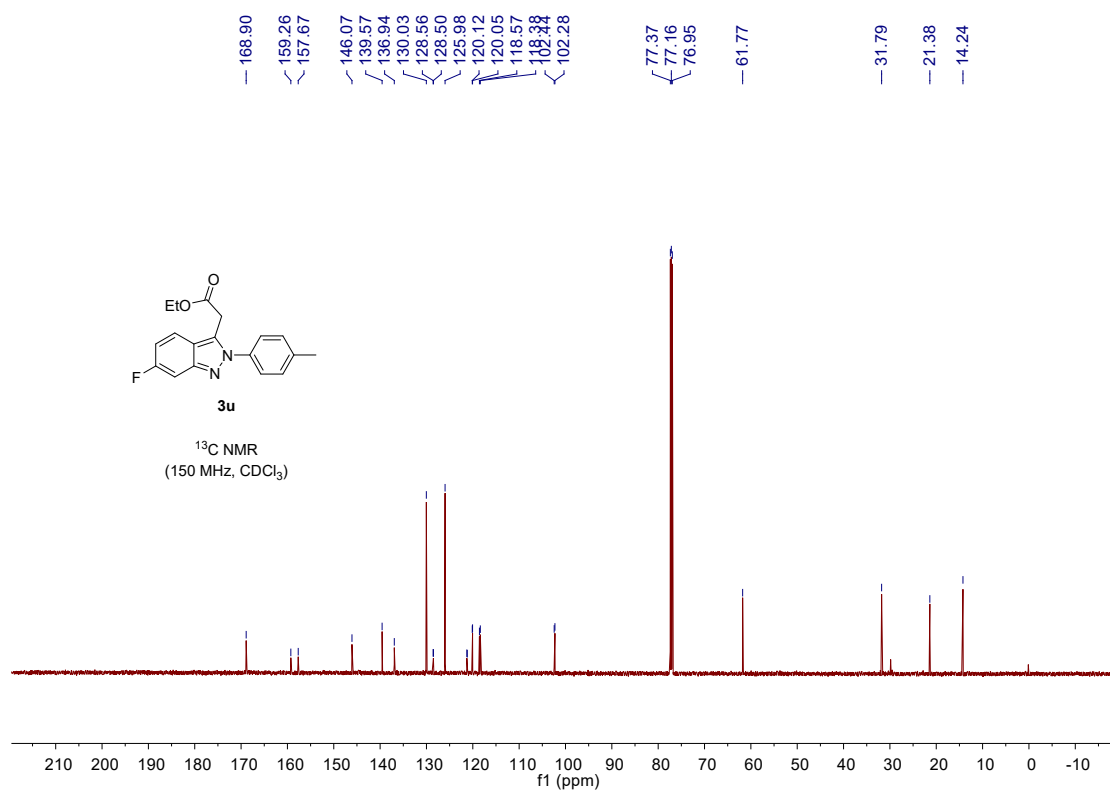

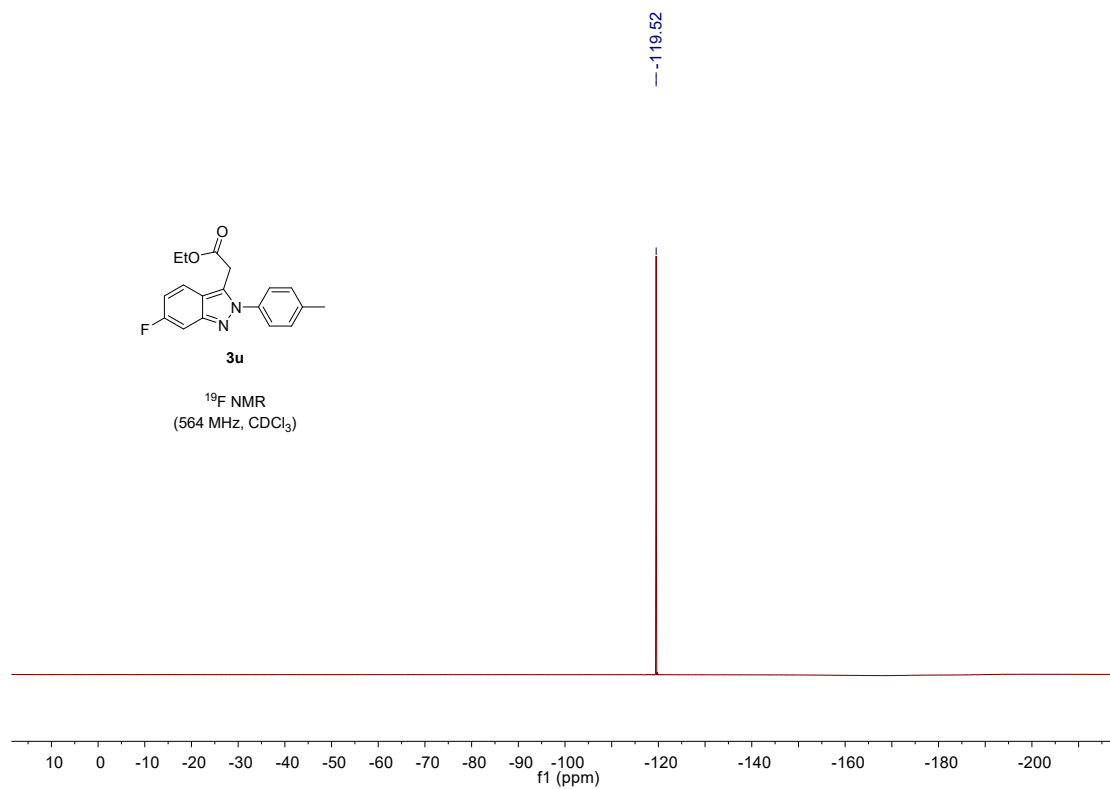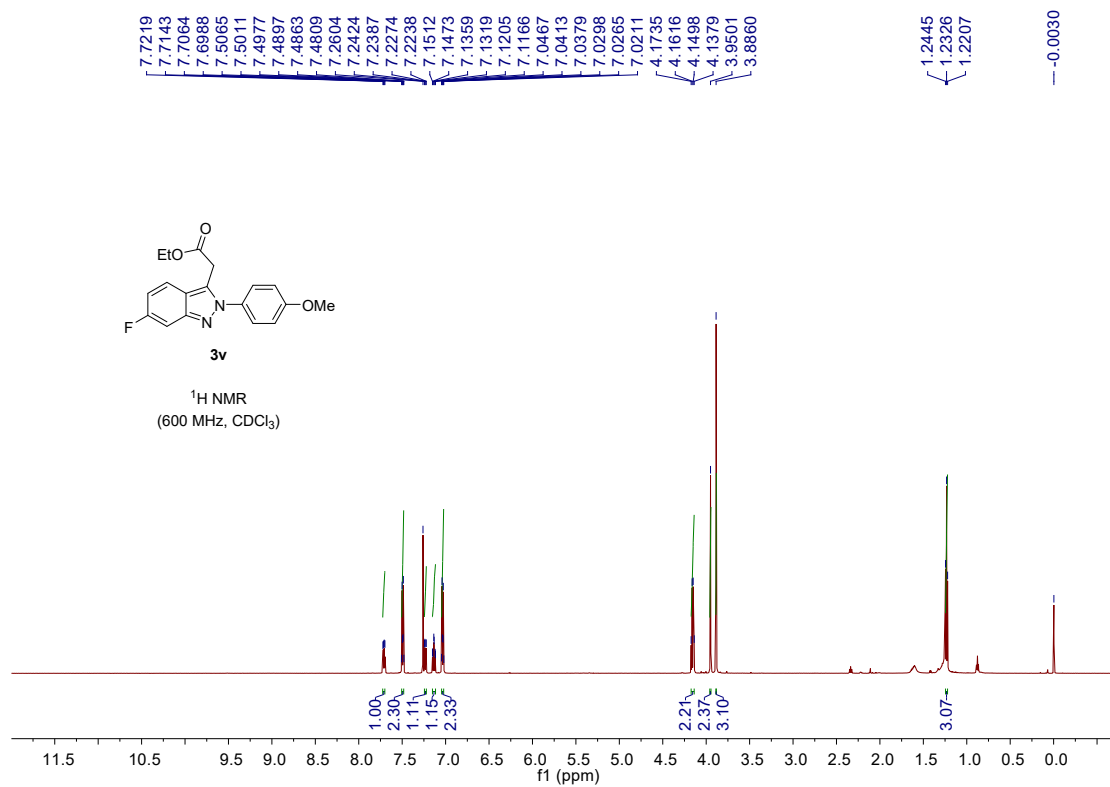

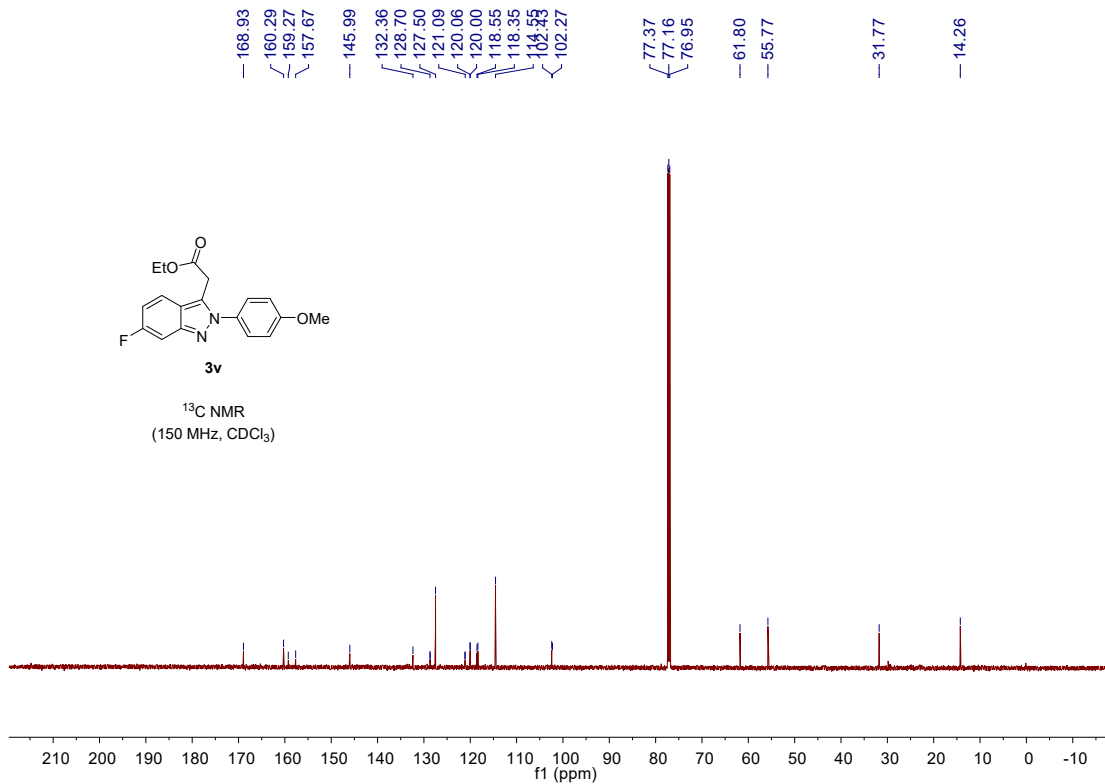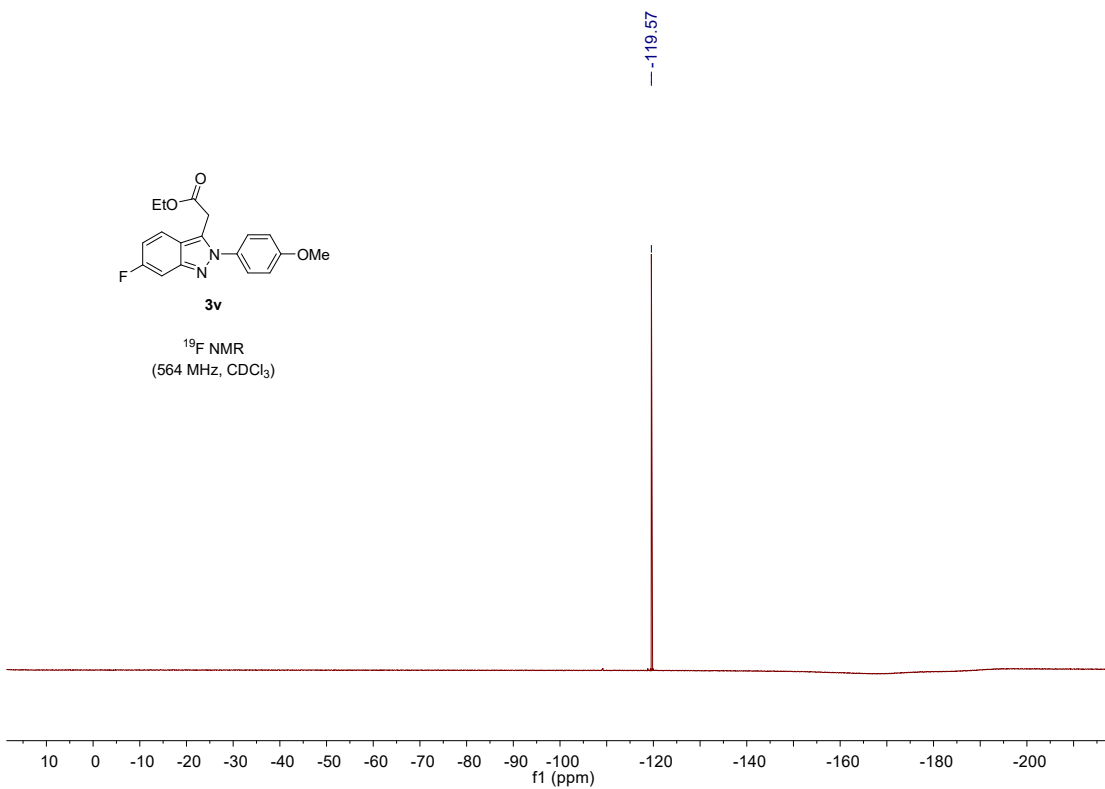

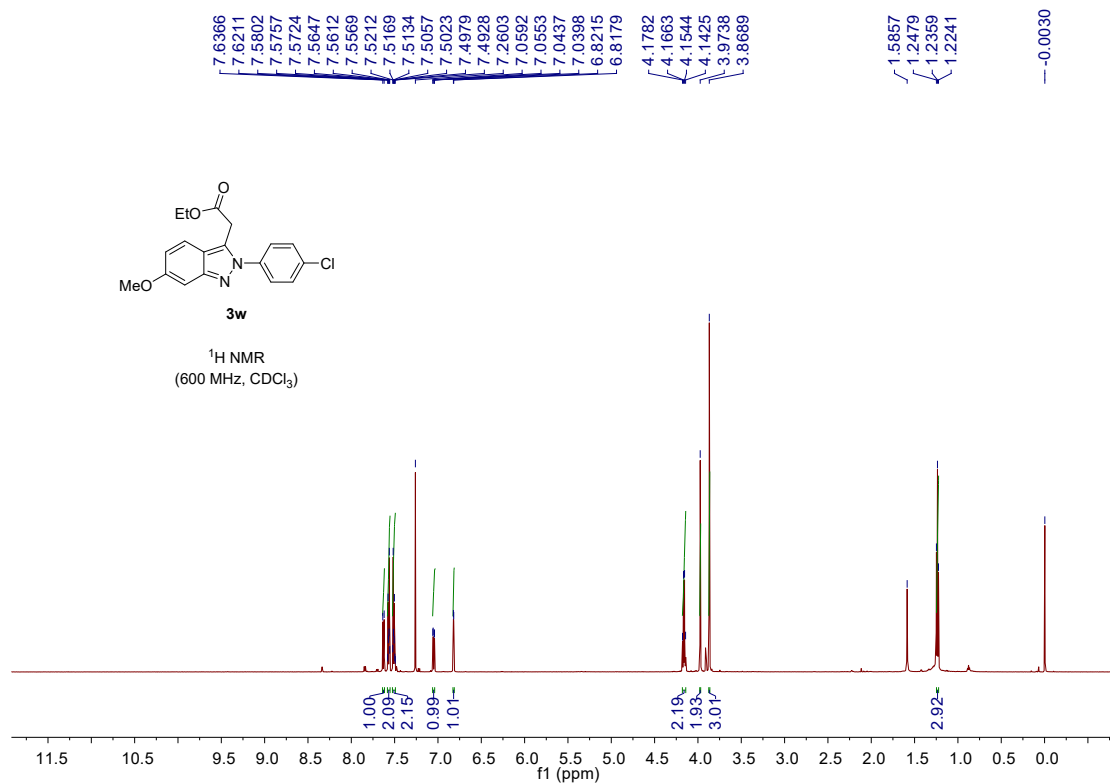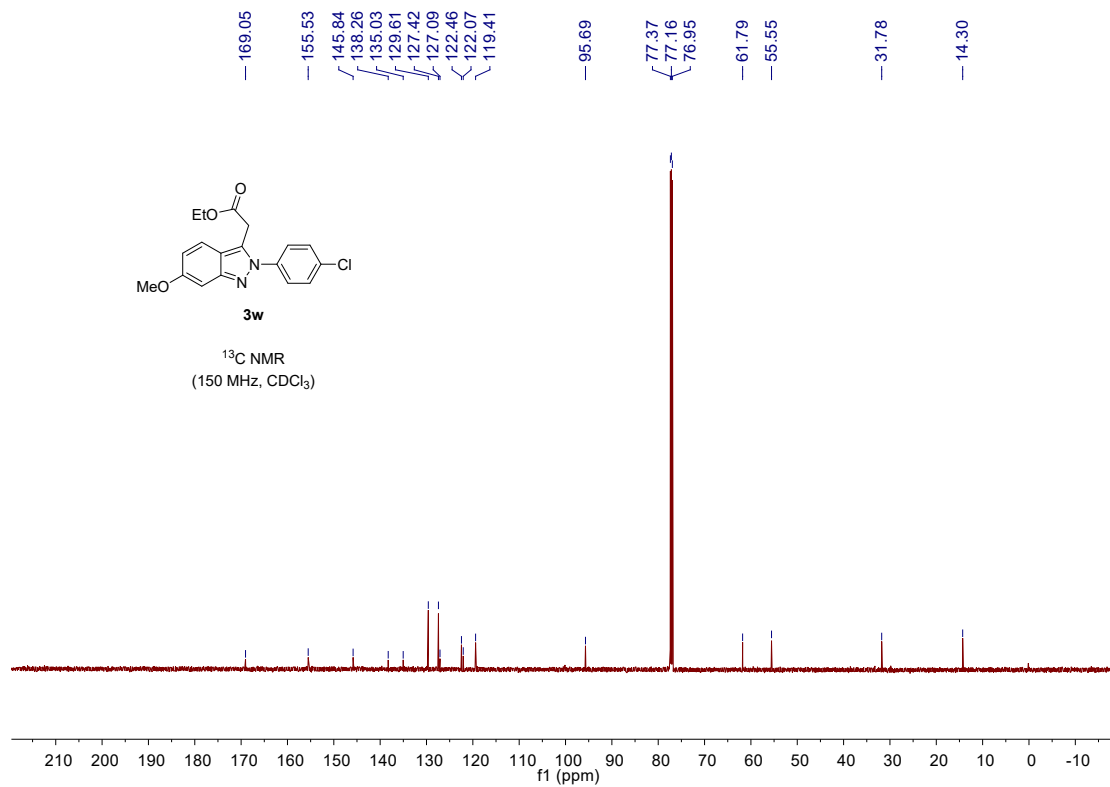

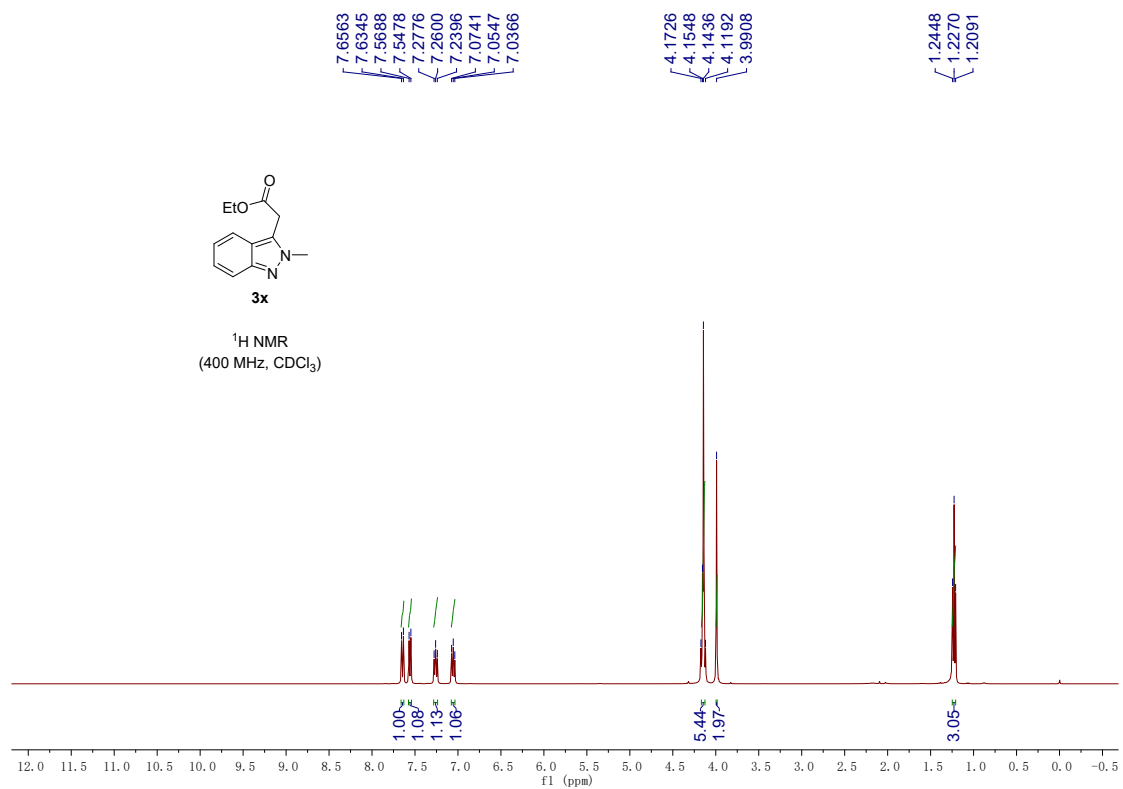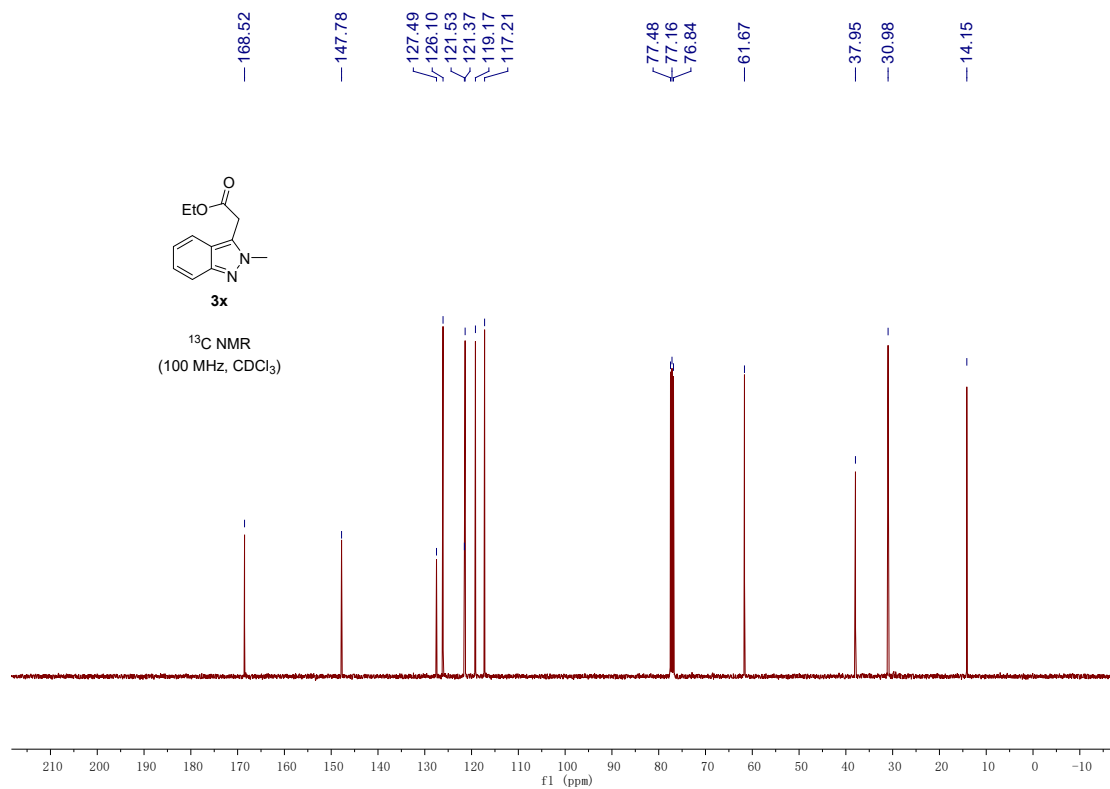

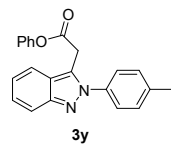

<sup>1</sup>H NMR  
(400 MHz, CDCl<sub>3</sub>)

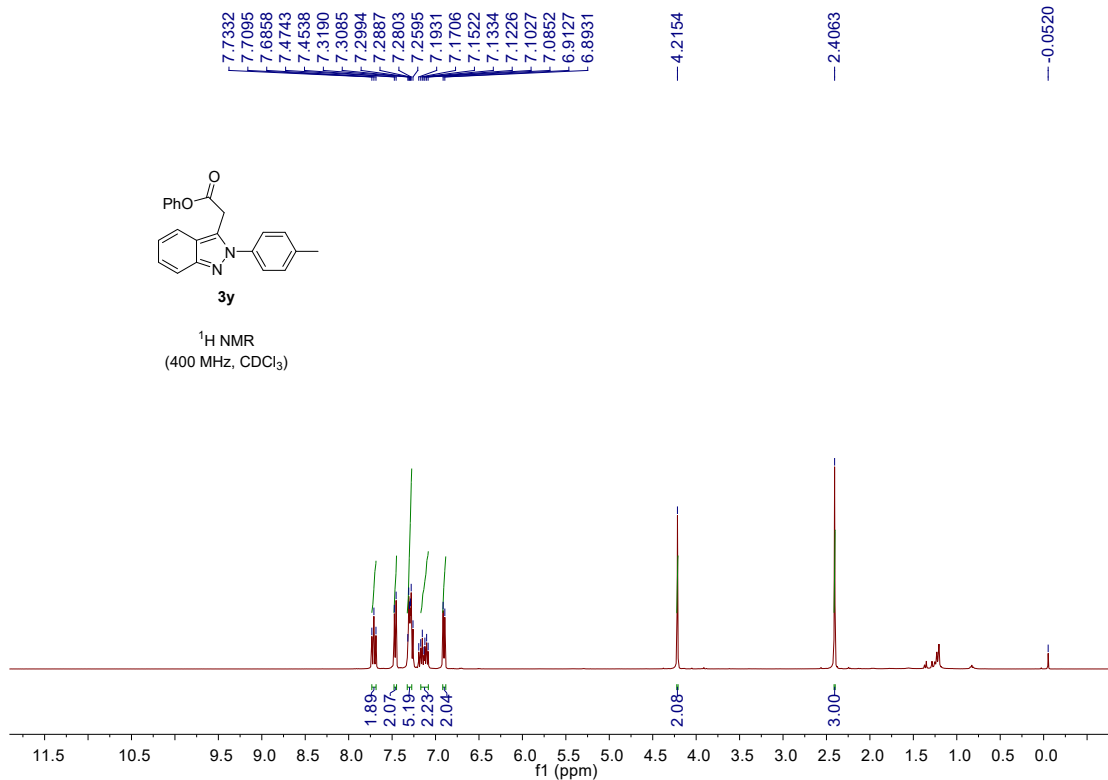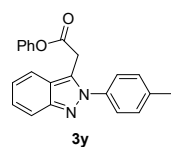

<sup>13</sup>C NMR  
(150 MHz, CDCl<sub>3</sub>)

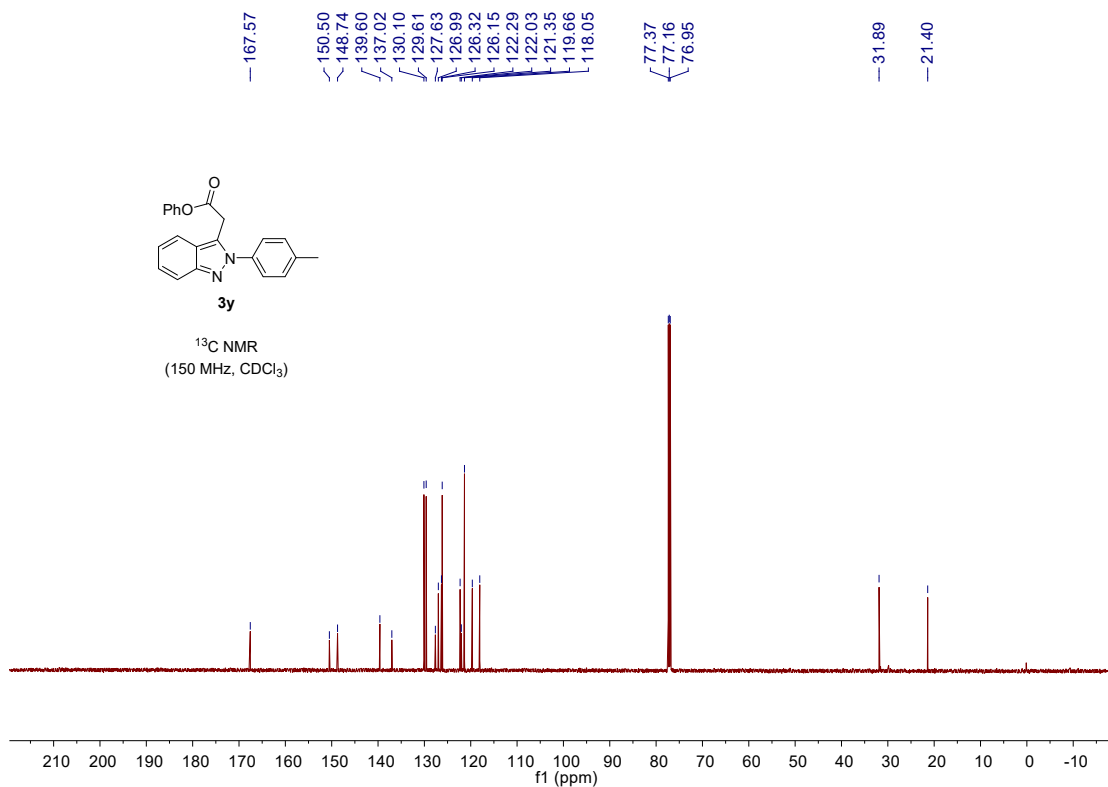

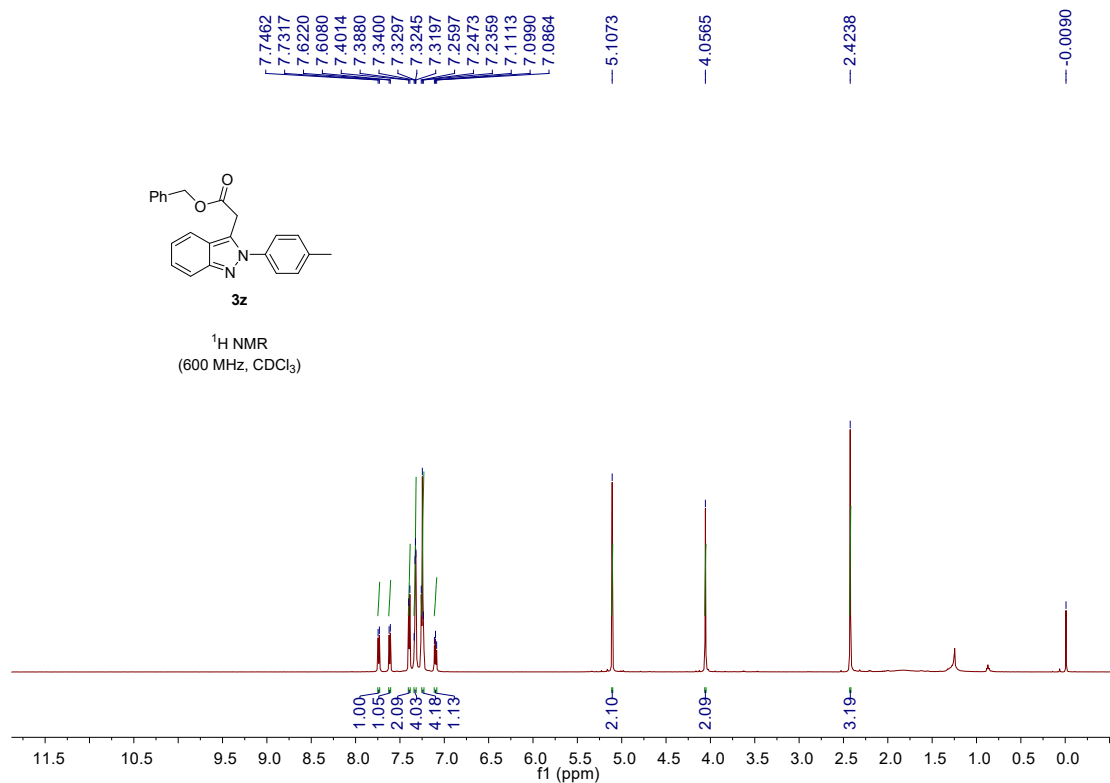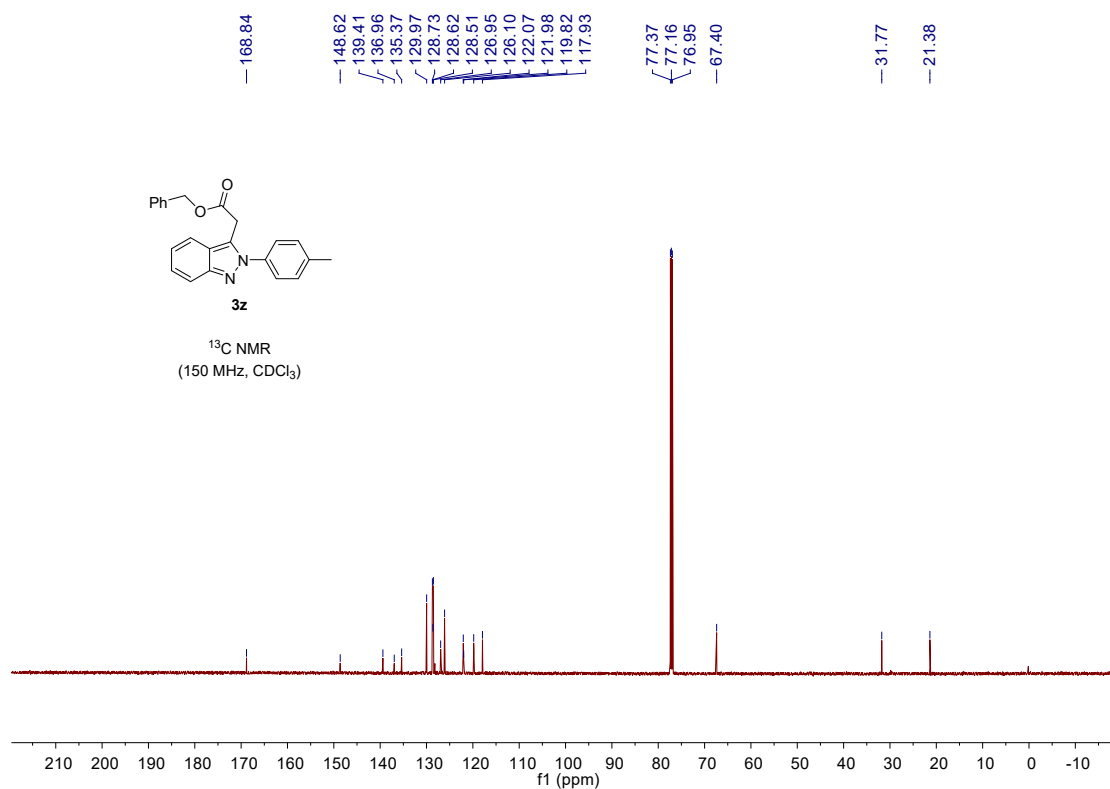

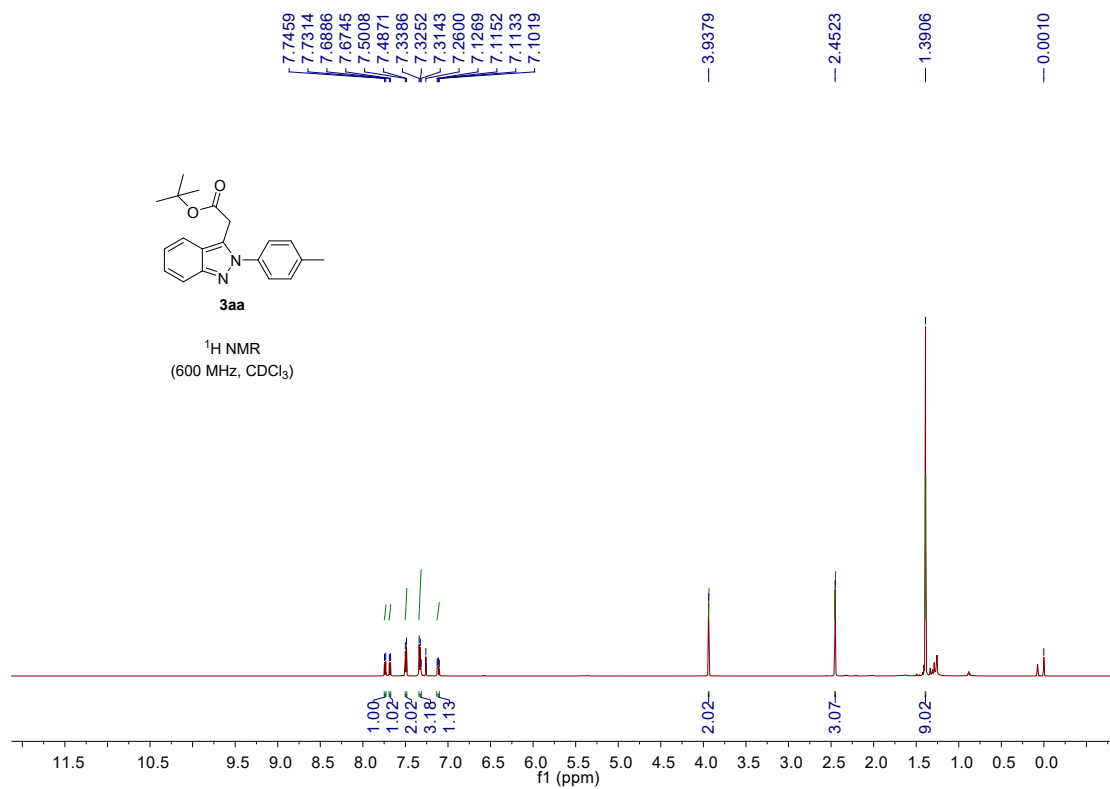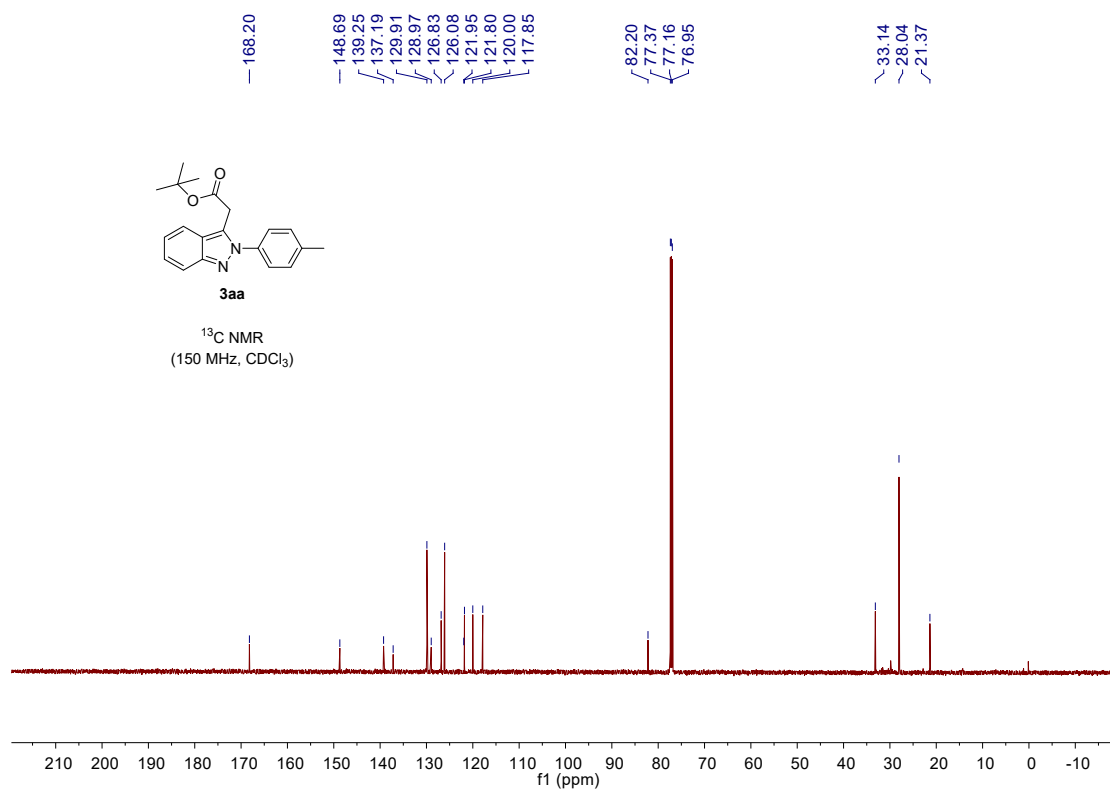



7.8105  
7.7959  
7.7029  
7.6888  
7.4442  
7.4306  
7.4018  
7.3903  
7.3763  
7.3467  
7.3331  
7.3196  
7.2904  
7.2778  
7.2638  
7.2598  
7.2067  
7.1937  
7.1815  
7.1727  
7.1179  
7.1057  
7.0936

4.1290  
2.4478  
1.5763  
0.0000

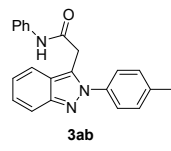

<sup>1</sup>H NMR  
(600 MHz, CDCl<sub>3</sub>)

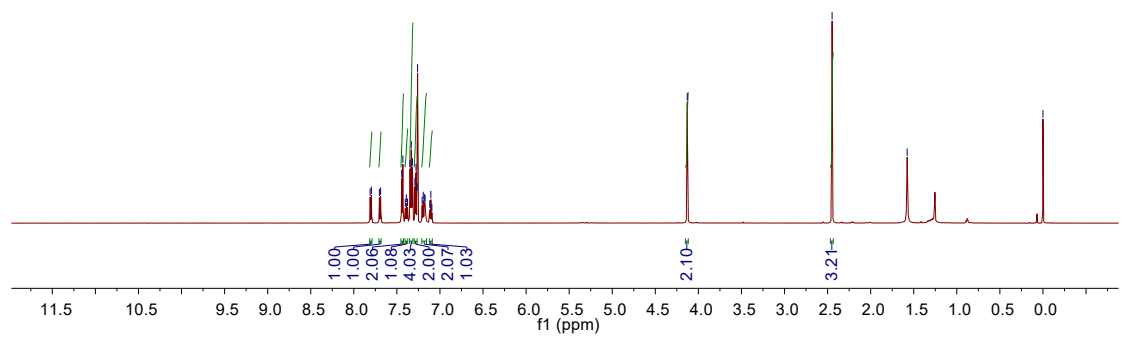

165.97  
148.94  
139.84  
137.19  
136.79  
130.30  
129.18  
128.36  
127.31  
125.83  
125.08  
122.99  
122.03  
120.25  
119.16  
118.38  
77.37  
77.16  
76.95  
34.67  
21.39

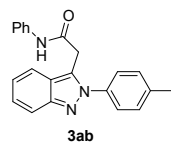

<sup>13</sup>C NMR  
(150 MHz, CDCl<sub>3</sub>)

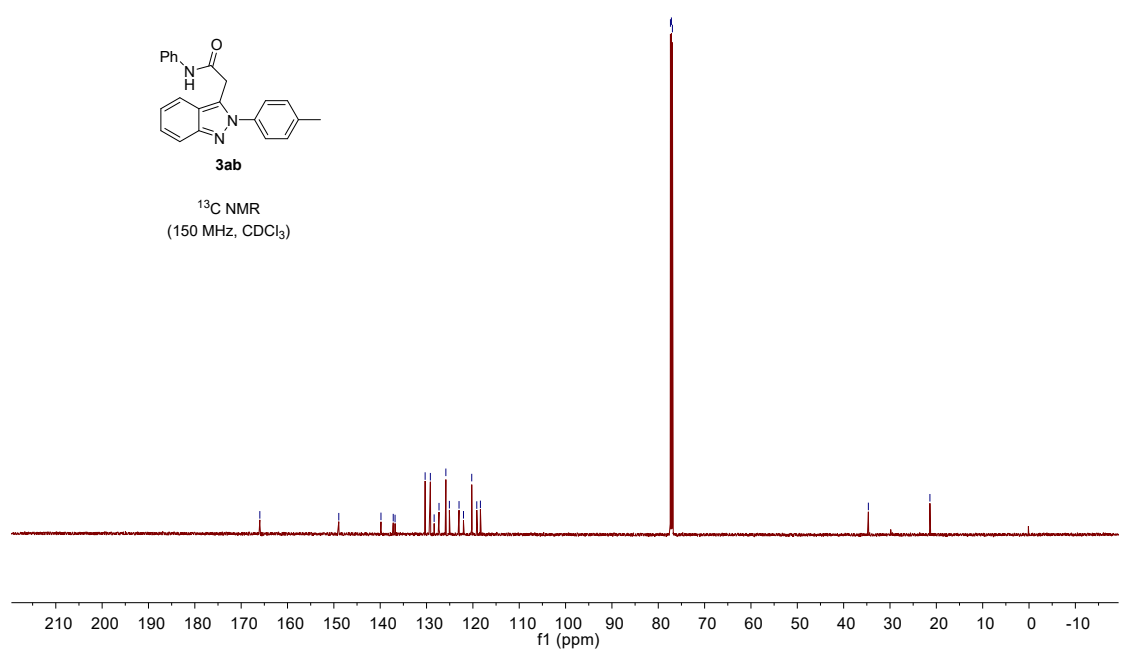

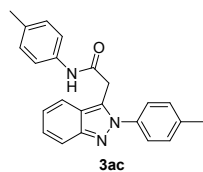

<sup>1</sup>H NMR  
(600 MHz, CDCl<sub>3</sub>)

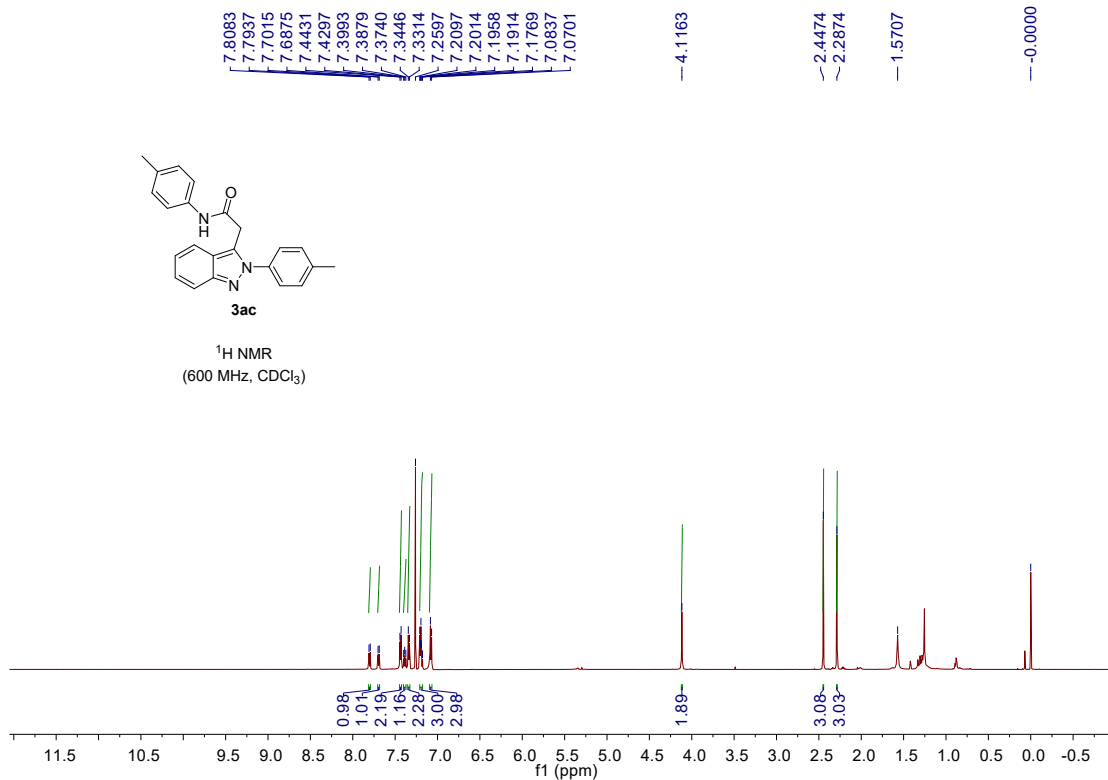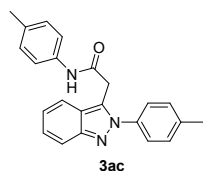

<sup>13</sup>C NMR  
(100 MHz, CDCl<sub>3</sub>)

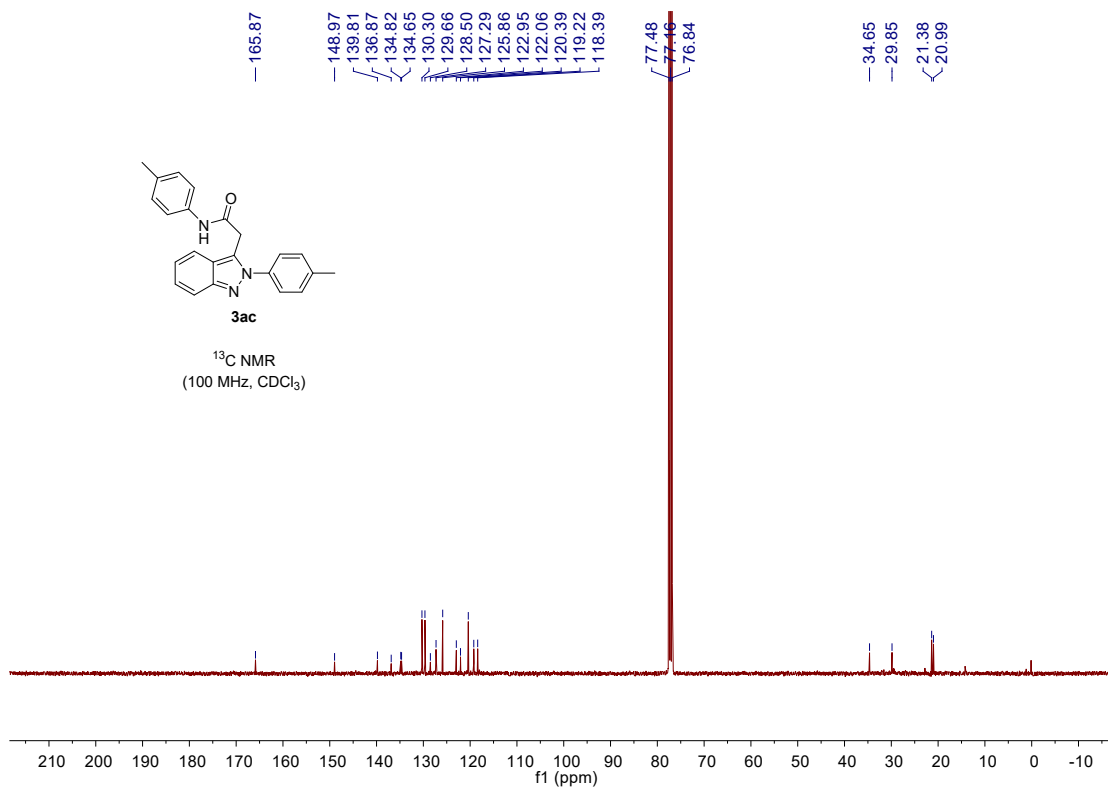

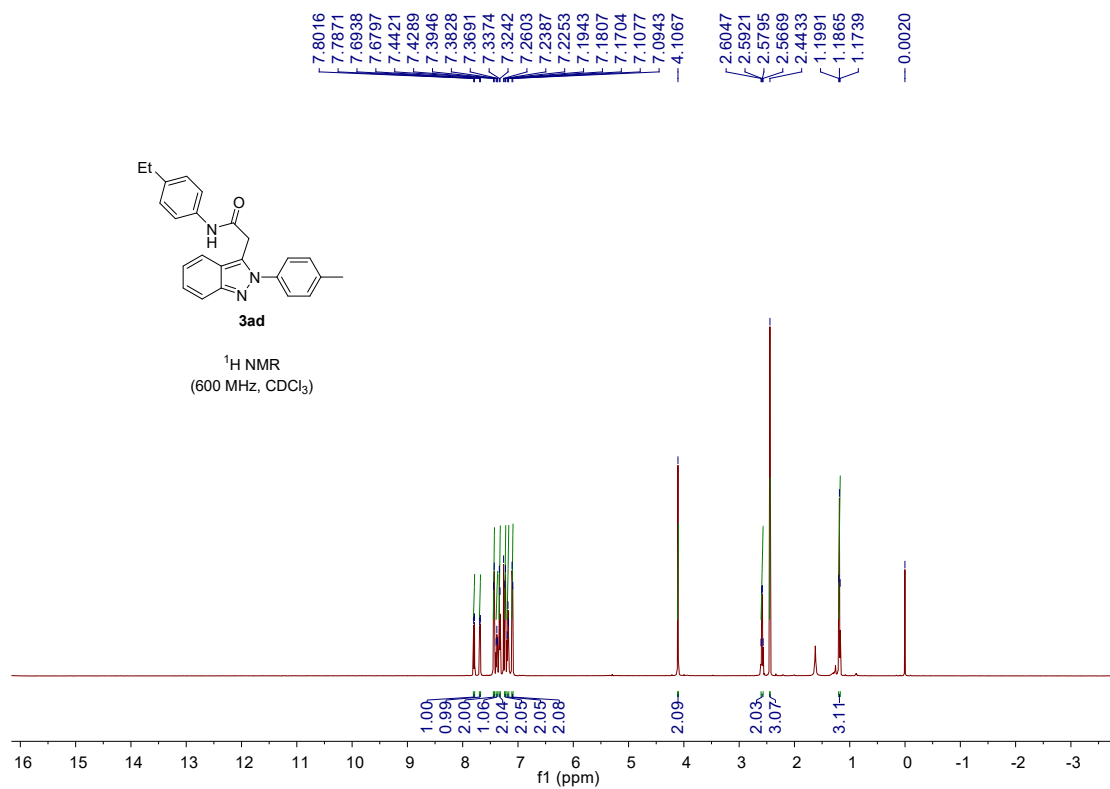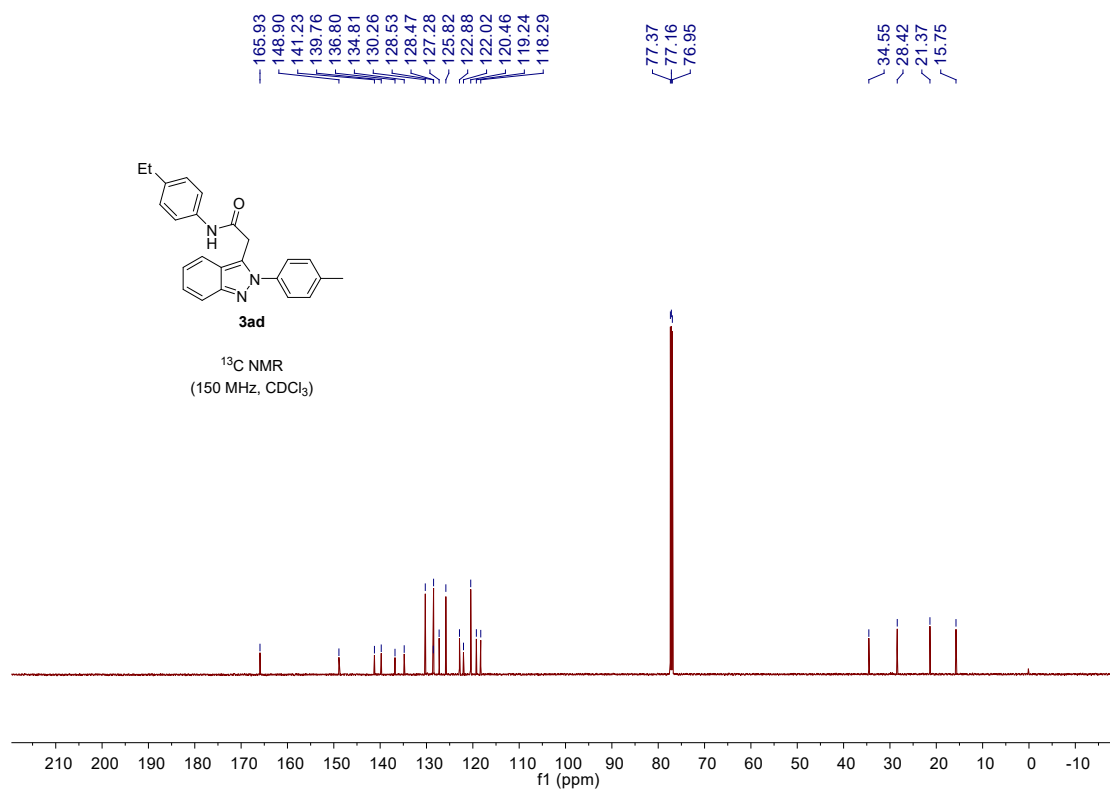

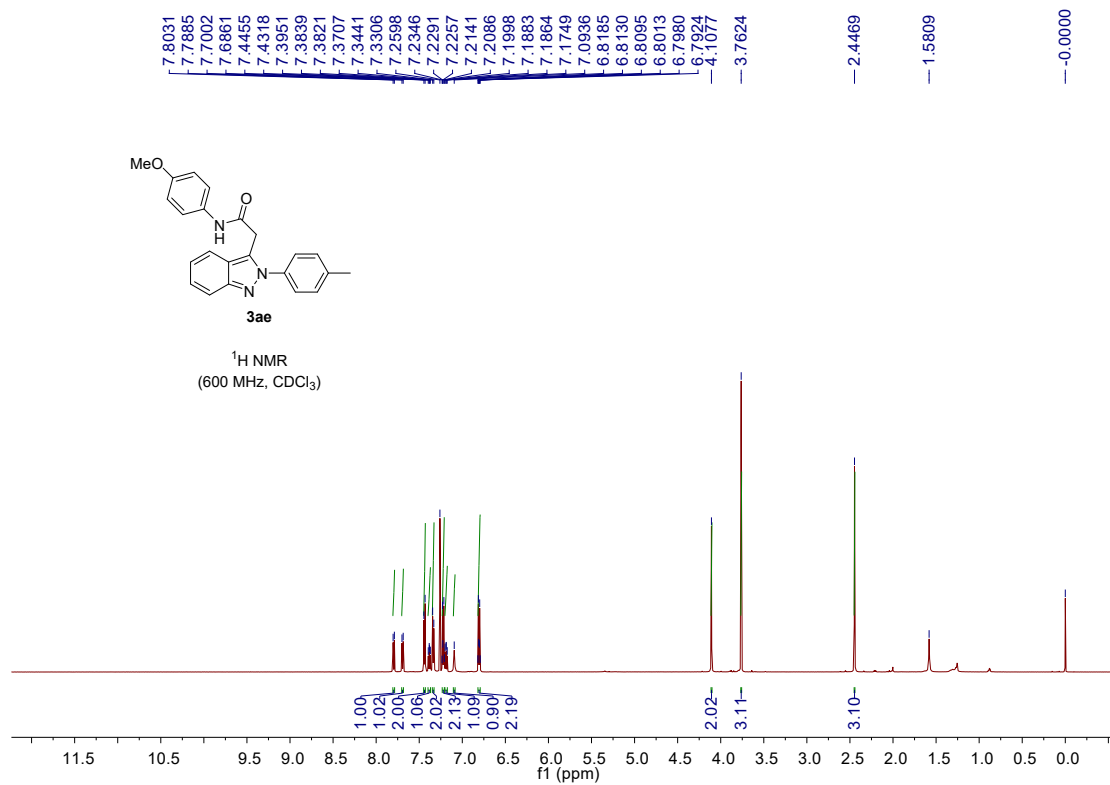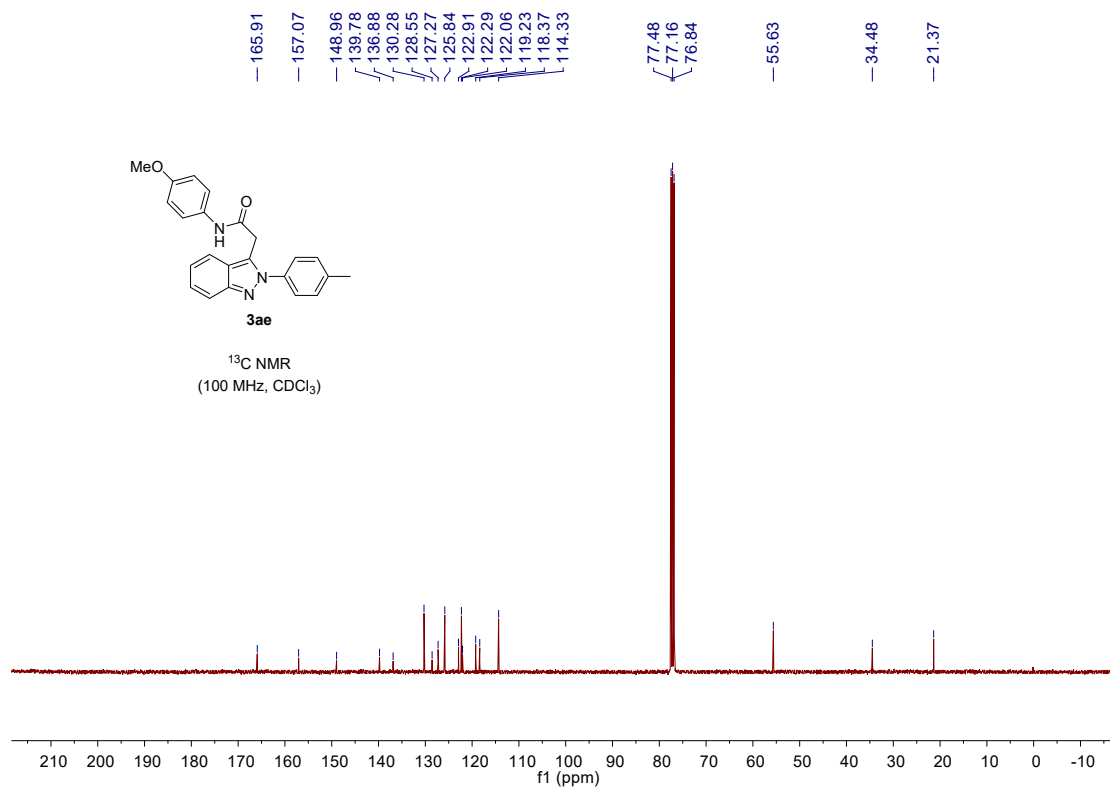

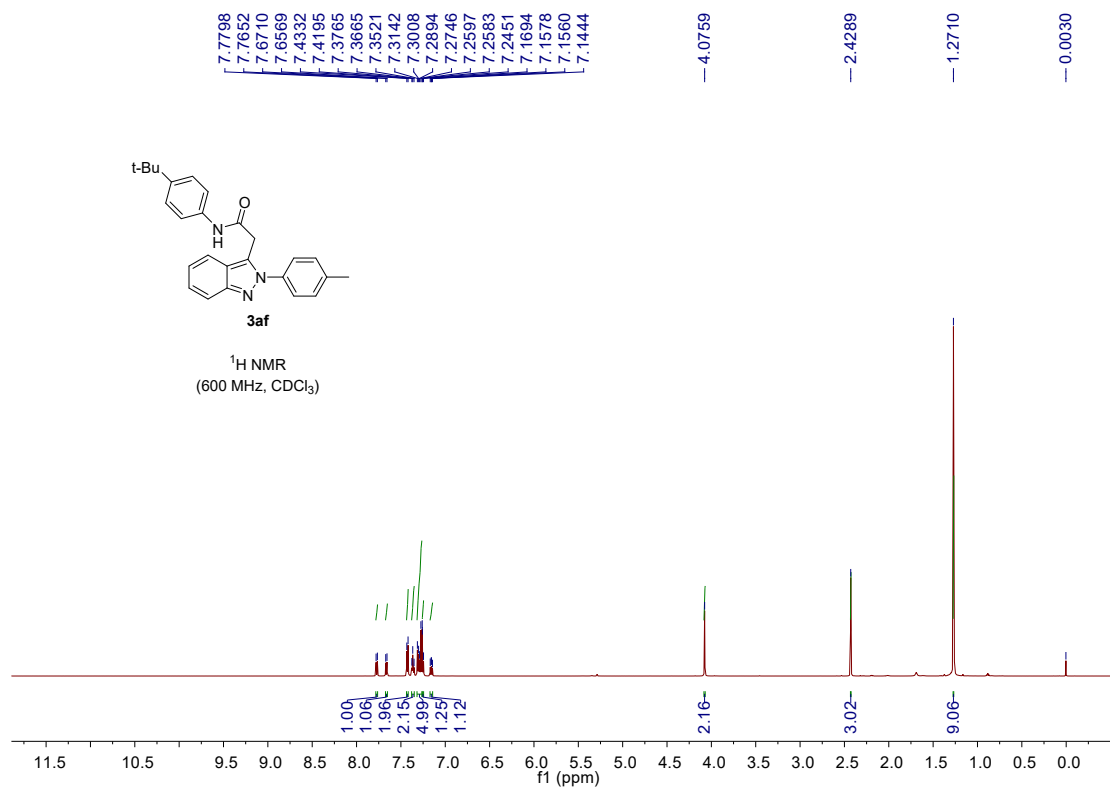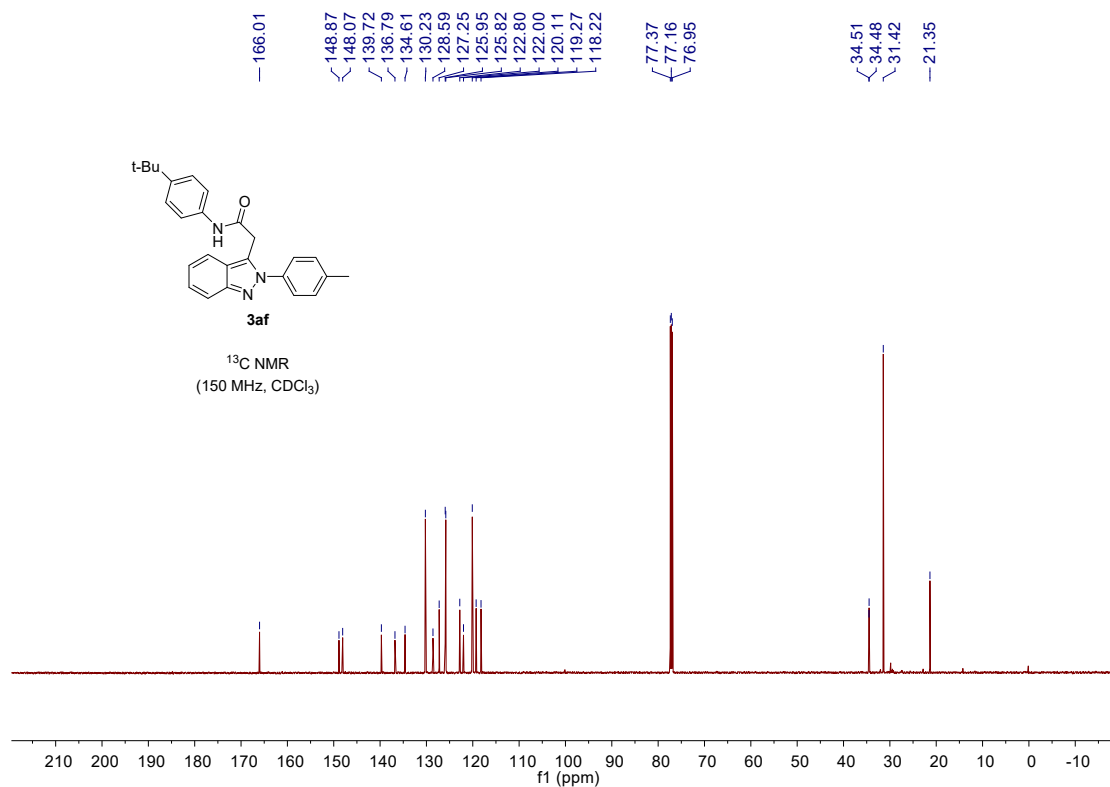

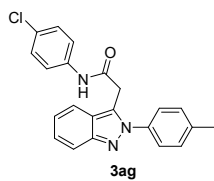

<sup>1</sup>H NMR  
(600 MHz, CDCl<sub>3</sub>)

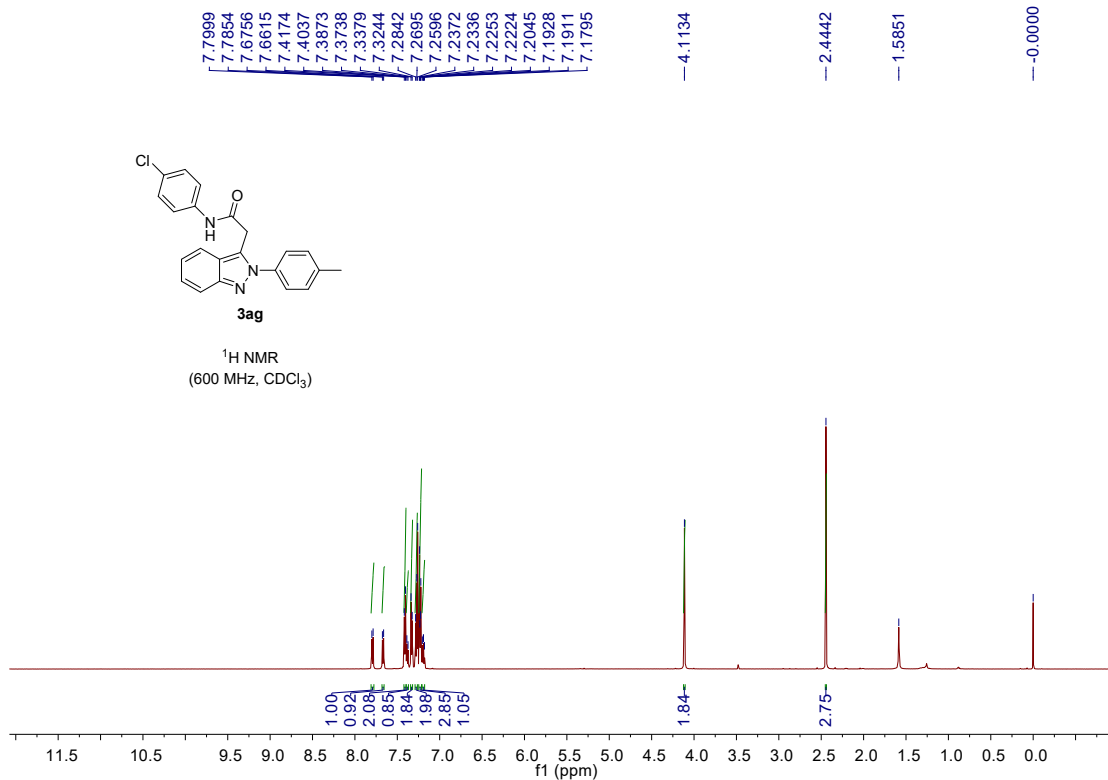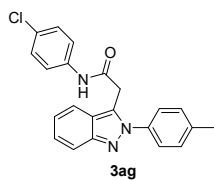

<sup>13</sup>C NMR  
(100 MHz, CDCl<sub>3</sub>)

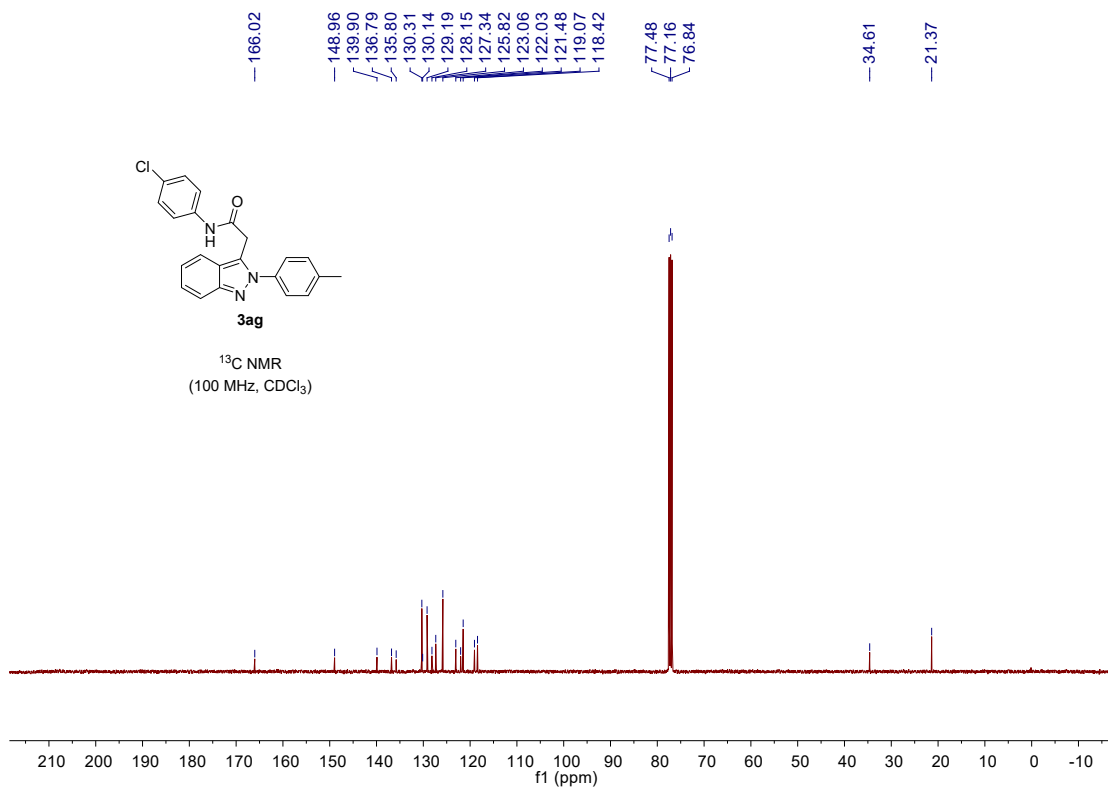

7.8117  
7.7971  
7.6810  
7.6669  
7.6357  
7.5213  
7.4657  
7.4515  
7.4190  
7.4087  
7.4052  
7.3996  
7.3980  
7.3961  
7.3945  
7.3849  
7.3834  
7.3448  
7.3313  
7.2599  
7.2172  
7.2164  
7.2051  
7.2033  
7.1921  
7.1913  
-4.1500  
-2.4474  
-1.5736  
-0.0000

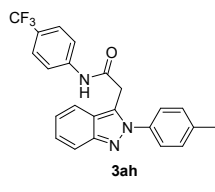

<sup>1</sup>H NMR  
(600 MHz, CDCl<sub>3</sub>)

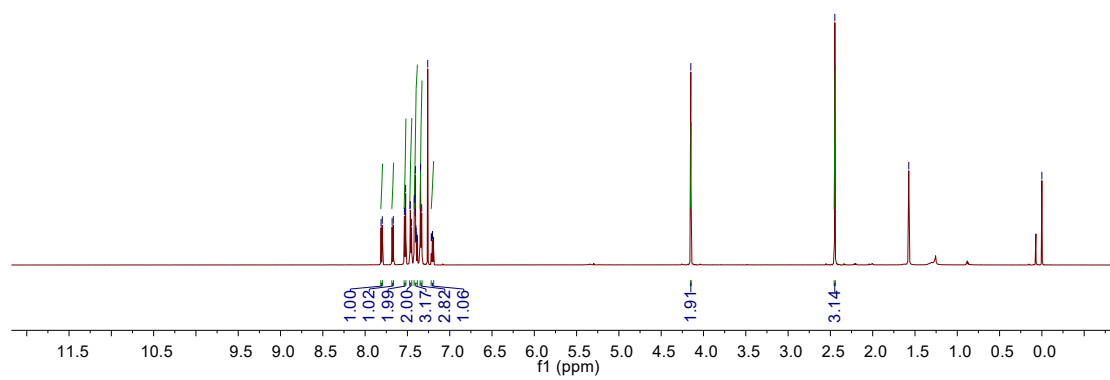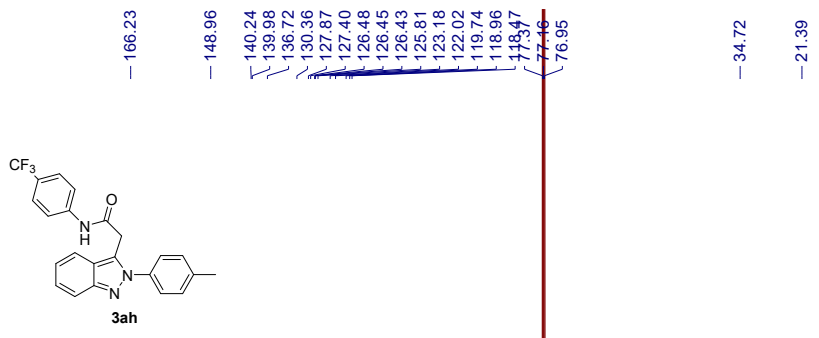

<sup>13</sup>C NMR  
(150 MHz, CDCl<sub>3</sub>)

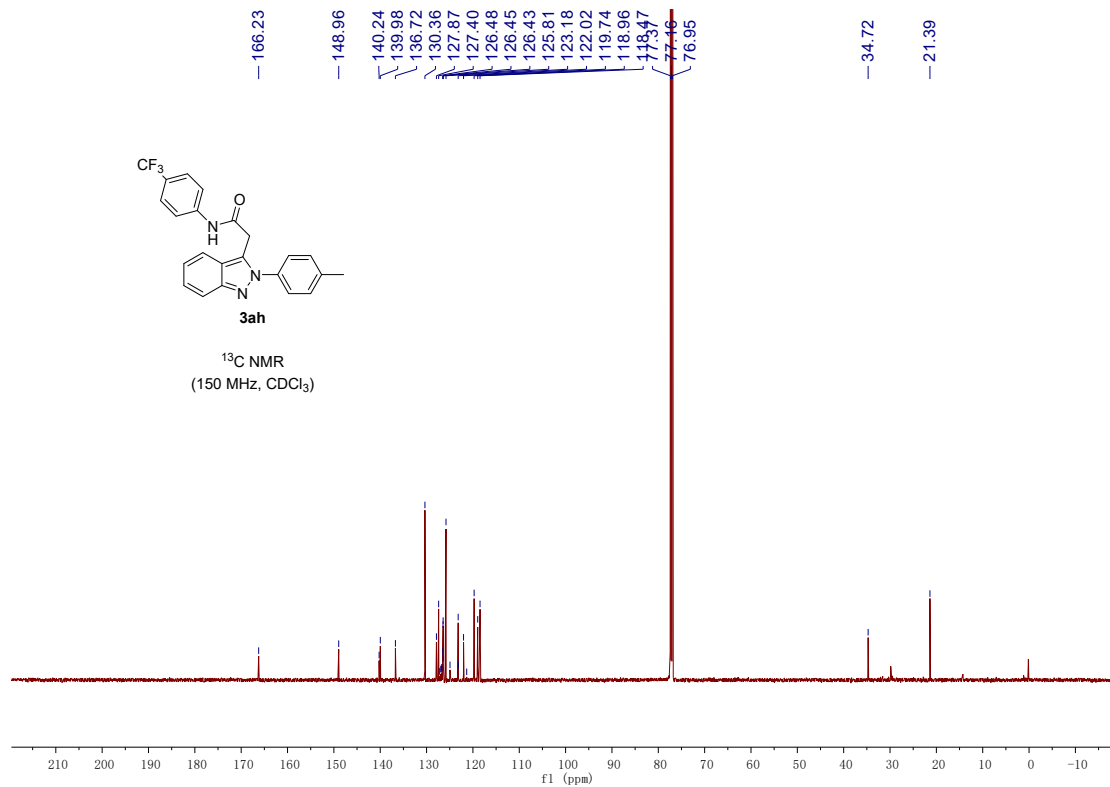

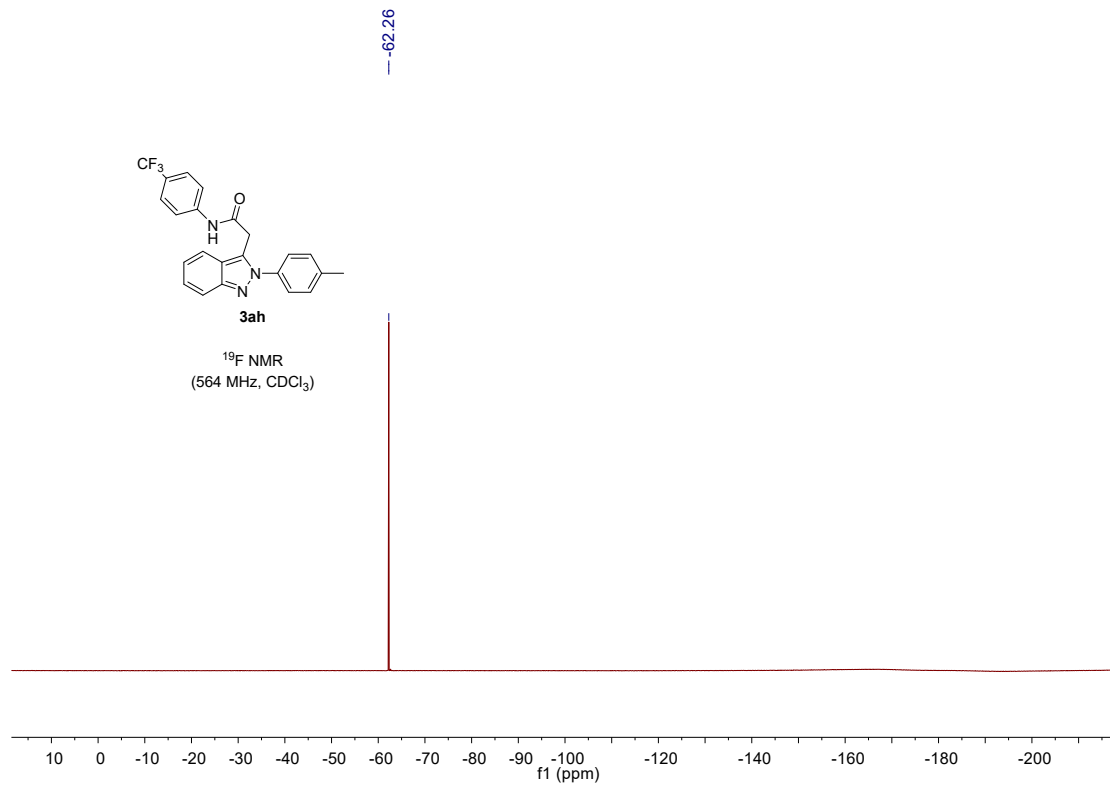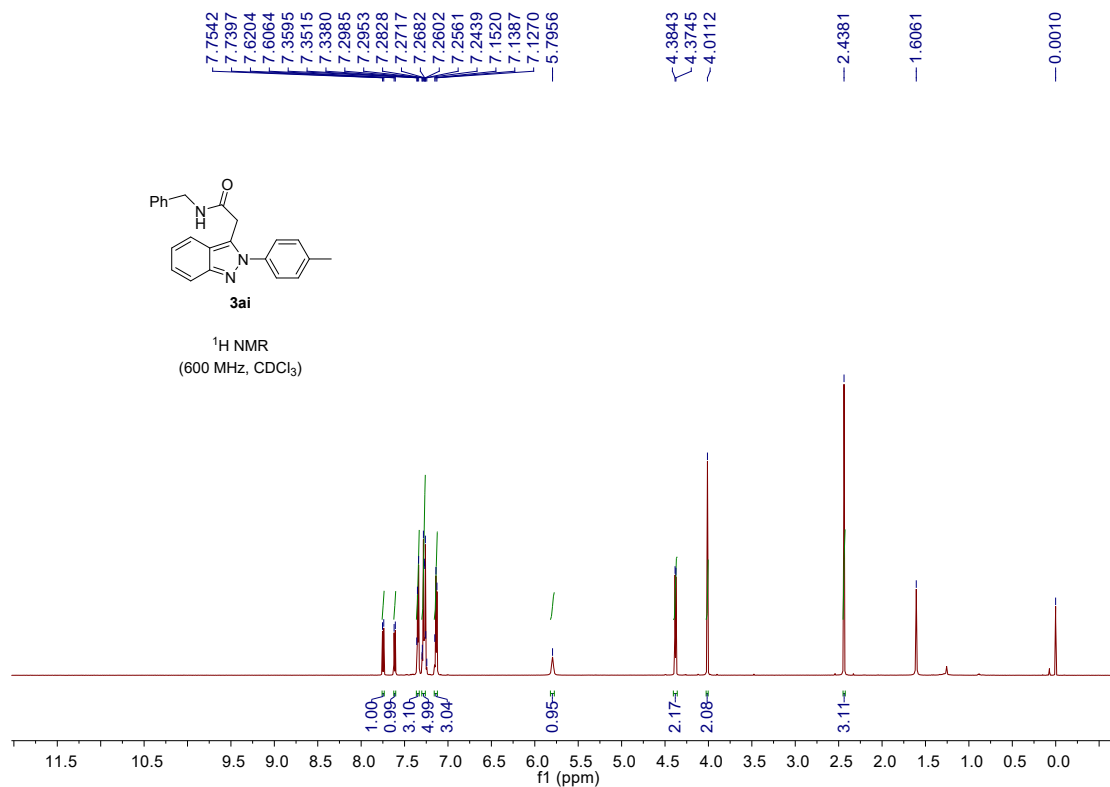



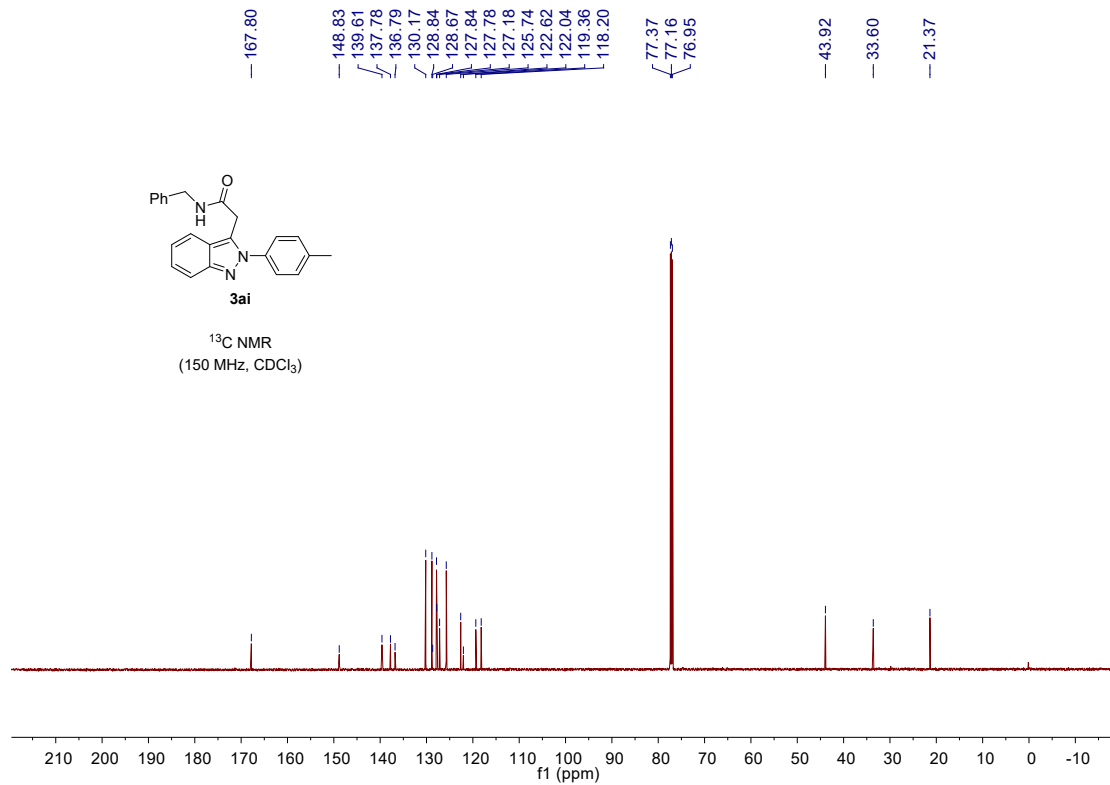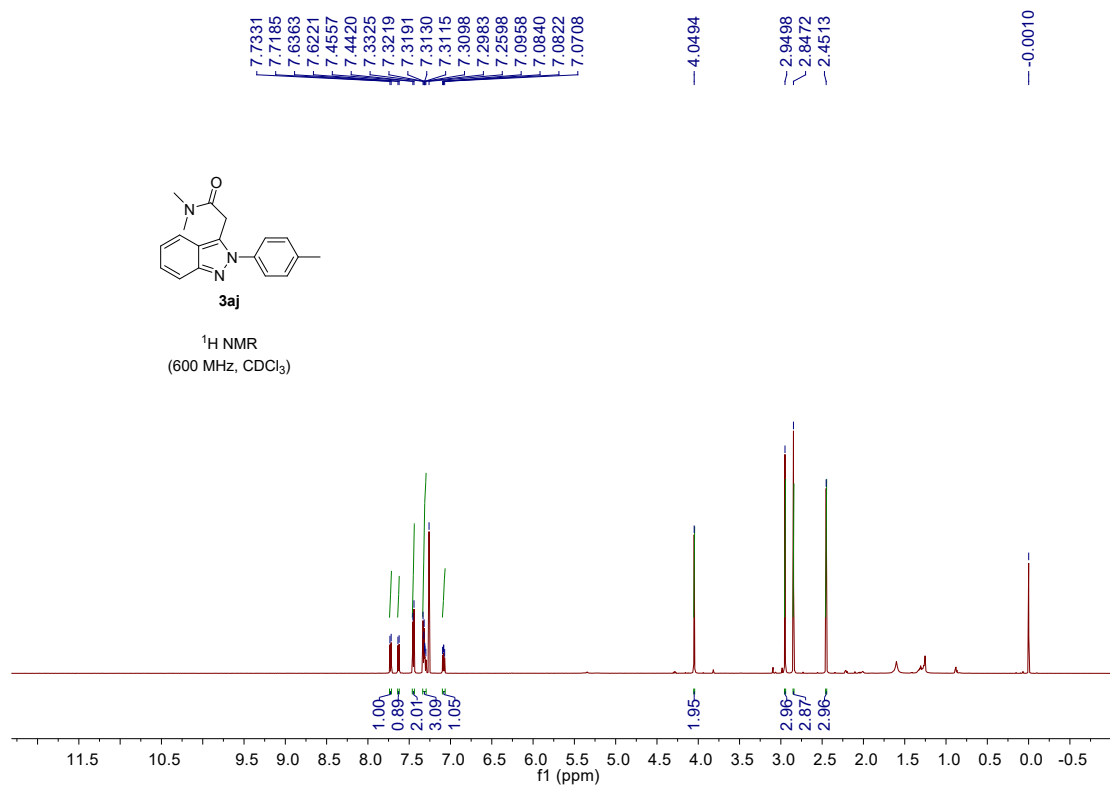

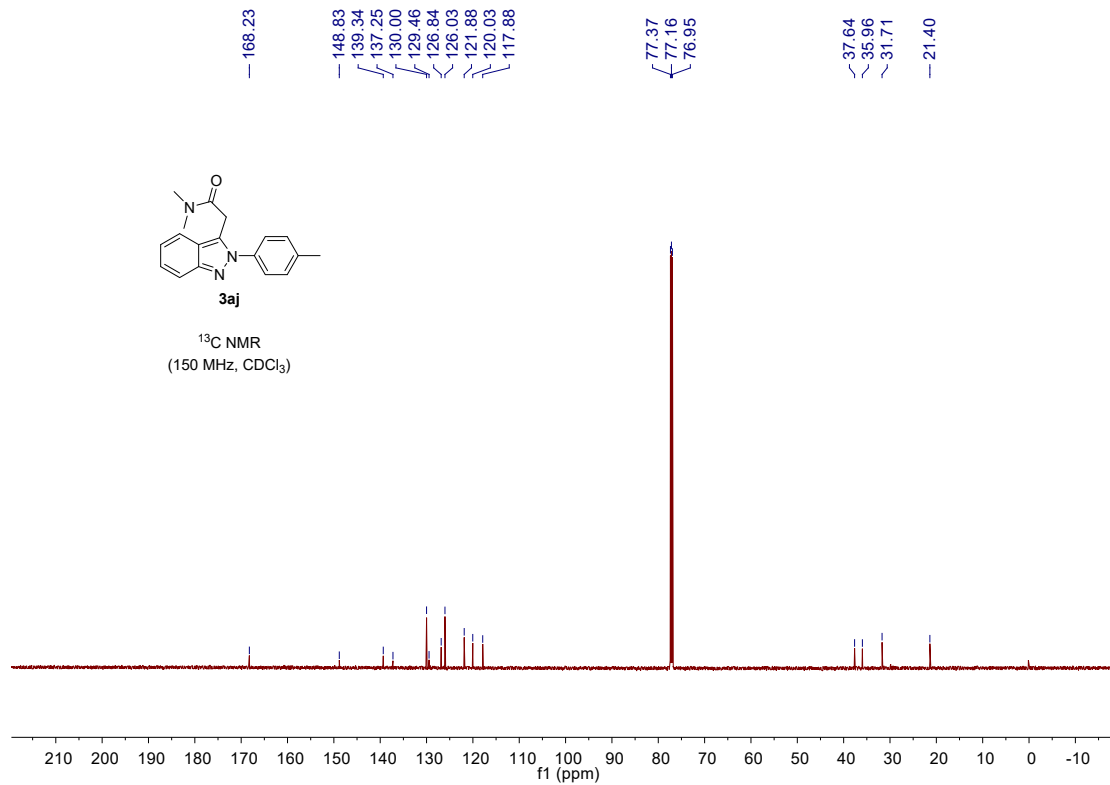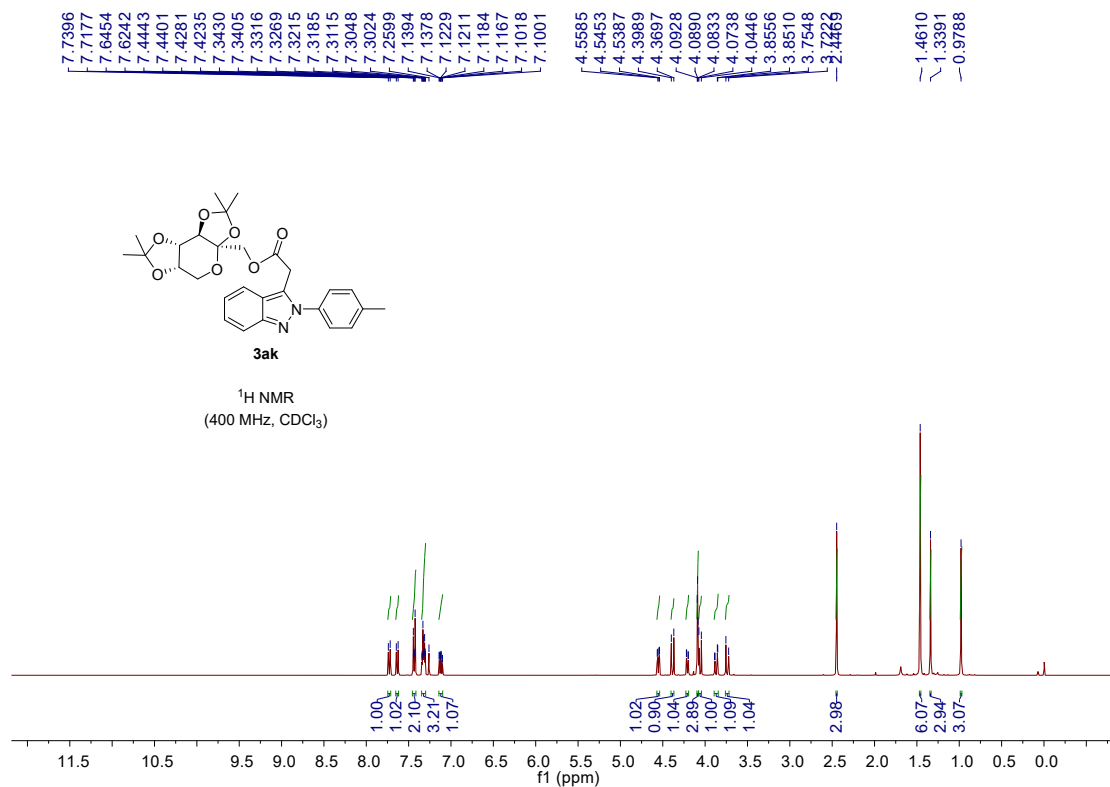

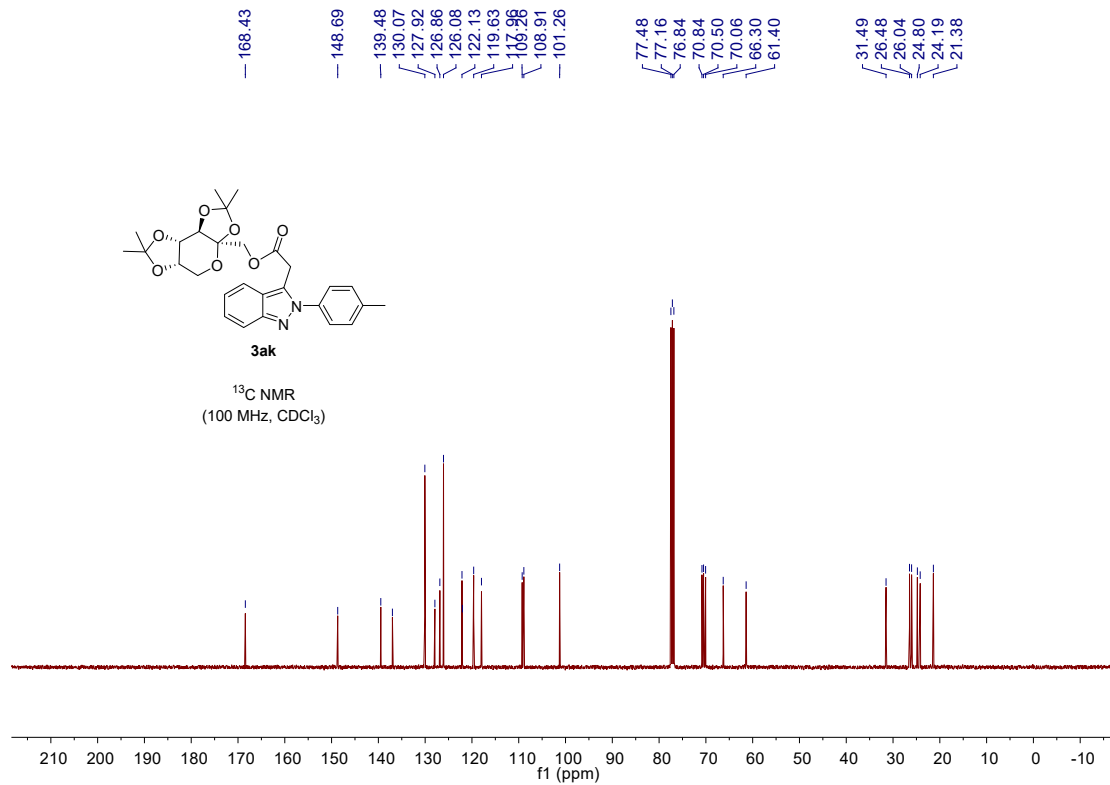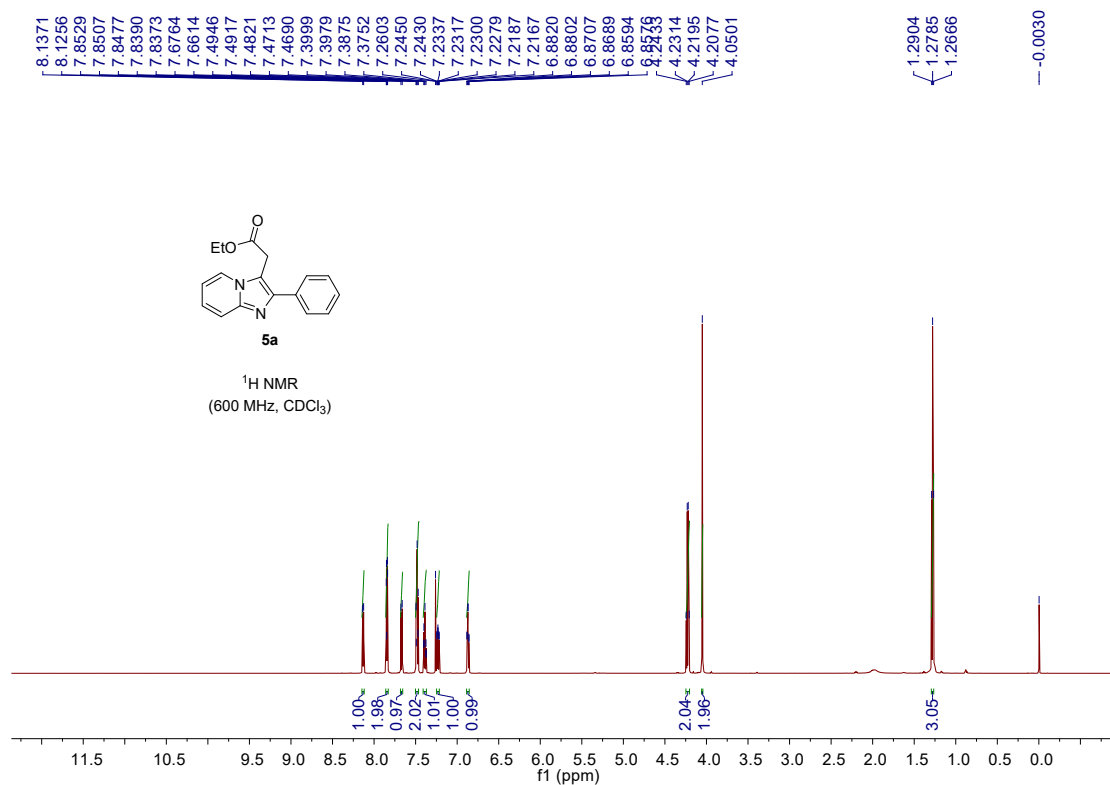

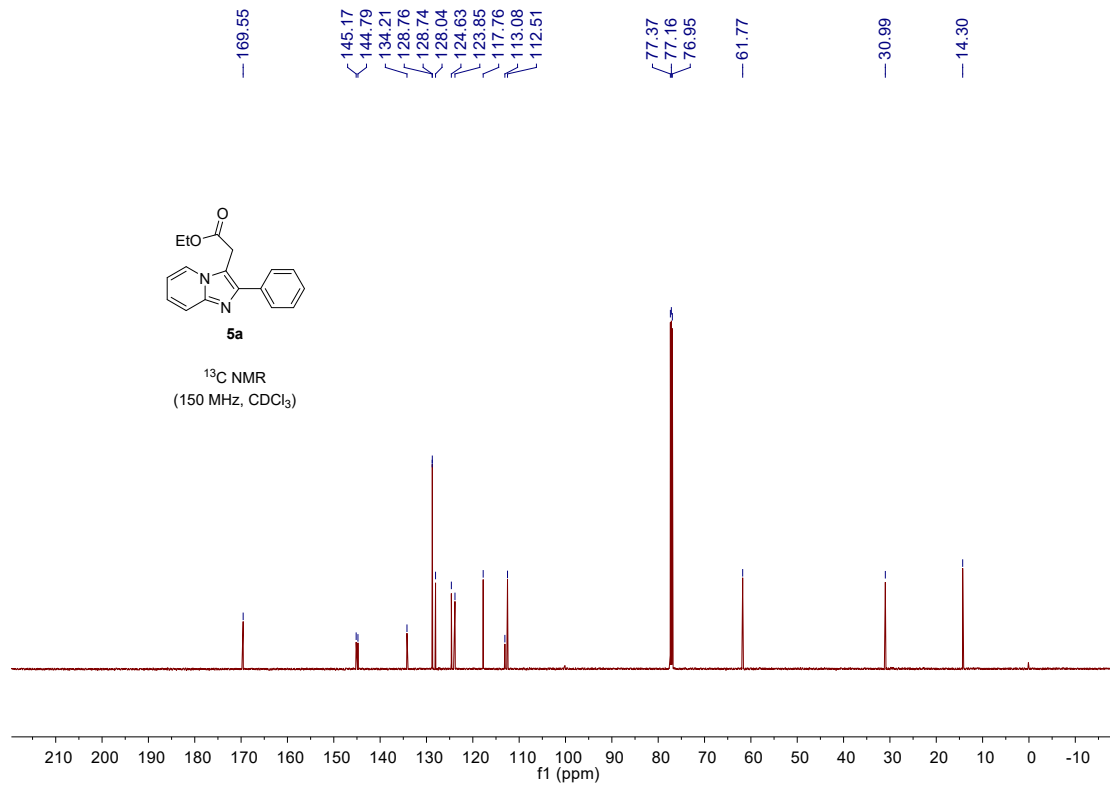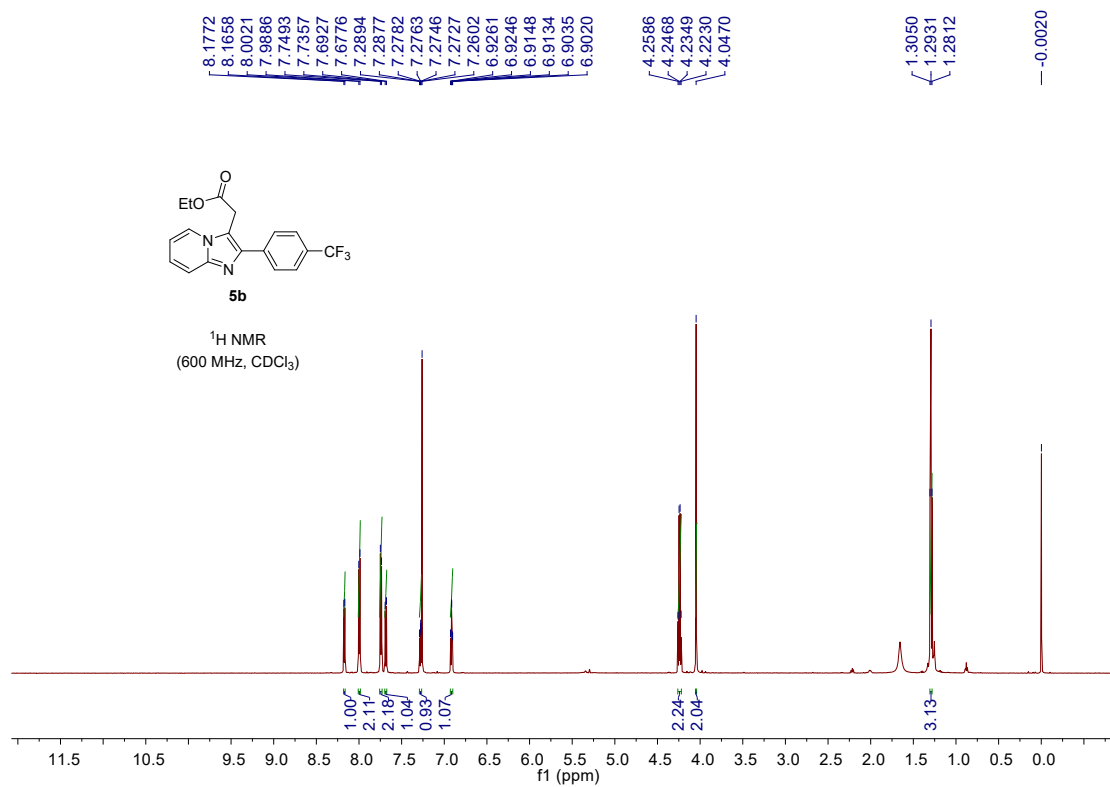

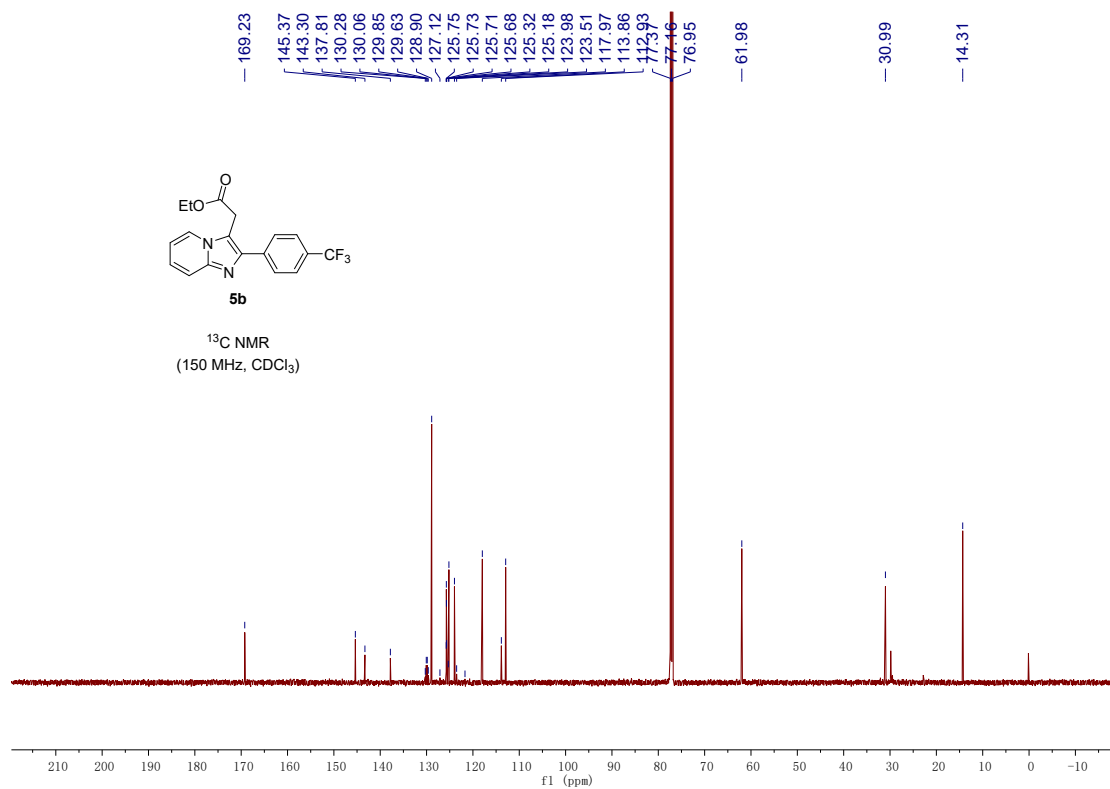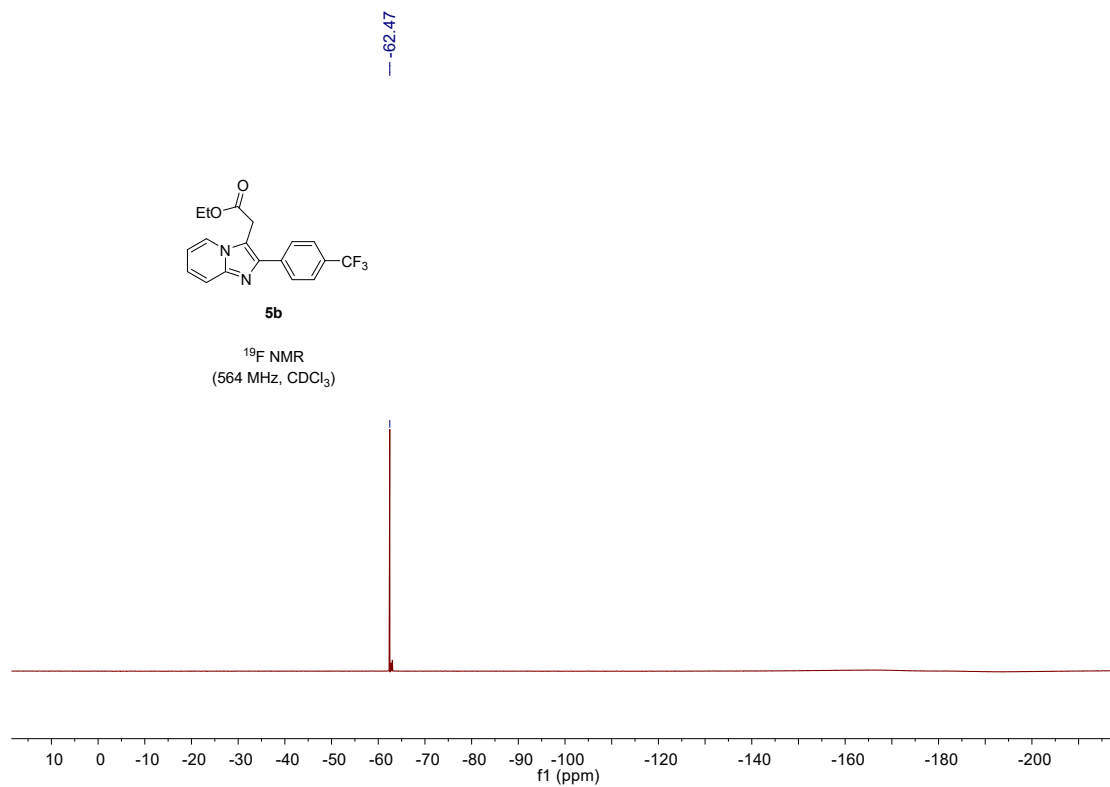

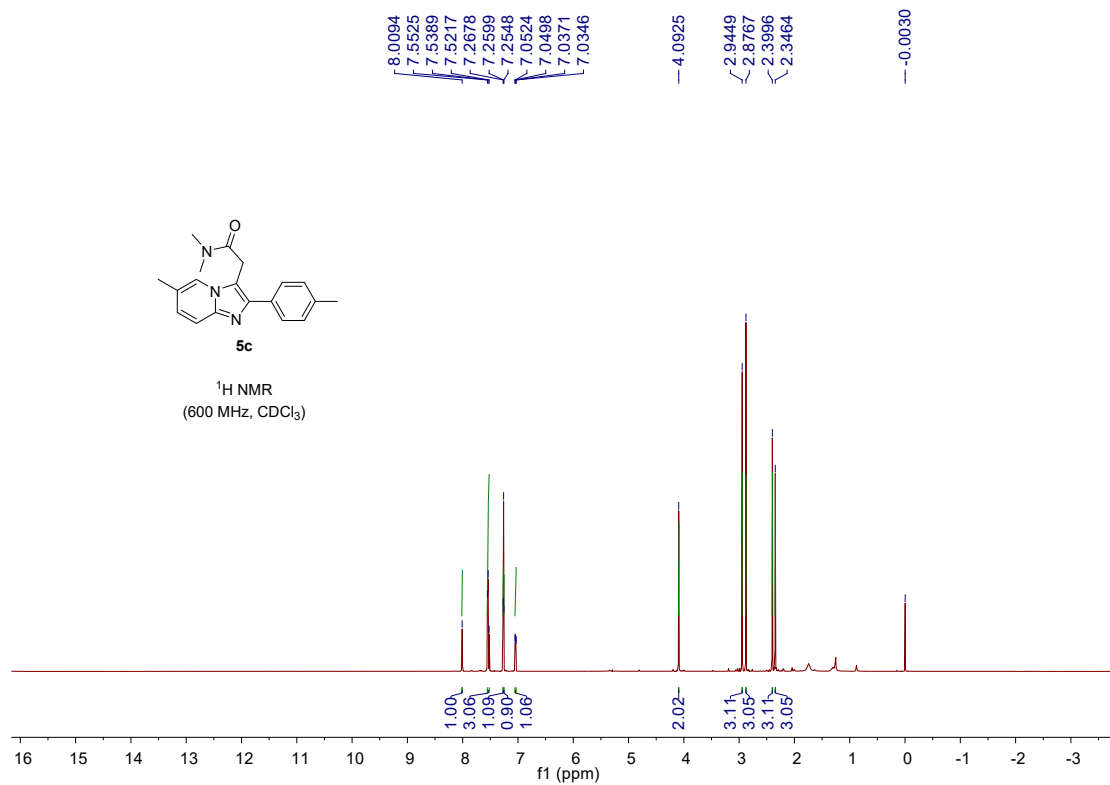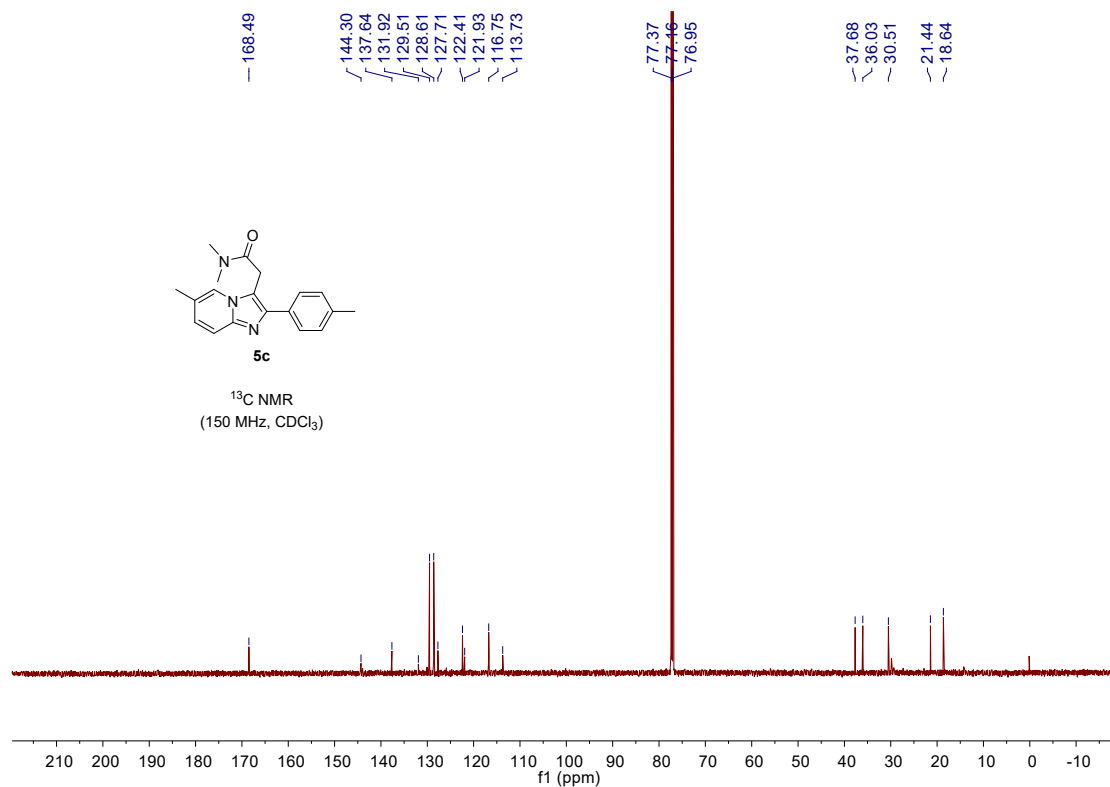

## References

- [1] Chanjuan, Cai, Shangjun, et al. Substrate-Controlled Transformation of Azobenzenes to Indazoles and Indoles via Rh(III)-Catalysis[J]. *The Journal of Organic Chemistry*, 2017, 82(1):512-520.
- [2] Kozikowski A, Gaysina I, et al. Inhibitors of Glycogen Synthase Kinase 3. WO 2007008514 A2.
- [3] Bhattacharjee S, Laru S, Samanta S, et al. Visible light-induced photocatalytic C–H ethoxycarbonylmethylation of imidazoheterocycles with ethyl diazoacetate[J]. *RSC Advances*, 2020, 10(47):27984-27988.
- [4] Wang Y, Zhang B, et al. Practical and scalable preparation of Minodronic acid and Zolpidem from 2-chloroimidazole[1,2-a]pyridines[J]. *Tetrahedron*, 2019, 75(8):1064-1071.
